# Supplementary material for: Genetic evidence for imported malaria and local transmission in Richard Toll, Senegal
Source: Malar J. 2020 Aug 3;19:276. doi: 10.1186/s12936-020-03346-x (PMC7397603; doi:10.1186/s12936-020-03346-x)
Supplement: Supplementary file 3 — Additional file 3. Richard toll parasite genotyping data. [file 12936_2020_3346_MOESM3_ESM.xlsx]

## Sheet: Sheet1
Sample Name	Year	A1	B1	A2	B2	A3	B3	A4	B4	A5	B5	A6	B6	A7	B7	A8	B8	A9	B9	A10	B10	A11	B11	A12	B12	MIXED	MISSING	P/F	M/P		TALLY
SEN_RT_001.2014	2014	T	A	C	T	C	C	A	G	T	C	T	A	C	C	C	A	T	T	C	G	C	T	T	G	0	0	P	M		PASS_MONO	473
SEN_RT_006.2014	2014	T	A	C	T	G	G	G	G	T	C	C	A	C	C	C	C	C	T	A	G	C	T	T	G	0	0	P	M		PASS_POLY	176
SEN_RT_008.2014	2014	T	A	C	T	C	C	G	G	A	T	C	A	C	C	A	C	C	T	A	G	A	T	T	G	0	0	P	M		PASS_TOTAL	649
SEN_RT_015.2014	2014	T	A	C	T	C	G	A	G	A	C	T	G	C	C	C	C	T	T	A	G	C	C	T	G	0	0	P	M		FAIL	110
SEN_RT_016.2014	2014	C	A	C	T	G	G	A	G	A	C	T	A	C	A	A	C	T	T	C	G	A	T	T	G	0	0	P	M		TOTAL	759
SEN_RT_017.2014	2014	T	A	C	T	C	G	A	G	T	T	C	G	C	C	A	C	T	T	A	G	A	T	T	G	0	0	P	M
SEN_RT_026.2014	2014	T	A	T	C	G	C	A	G	T	C	T	G	T	C	C	C	C	T	A	G	A	T	T	G	0	0	P	M		MONO + MISSING 0,1	426
SEN_RT_029.2015	2015	C	A	T	T	C	C	A	G	A	C	T	G	C	A	C	A	C	A	A	G	C	T	T	G	0	0	P	M
SEN_RT_030.2015	2015	T	A	C	C	C	G	G	G	T	C	C	G	T	A	A	C	C	A	A	G	A	C	T	G	0	0	P	M
SEN_RT_032.2014	2014	C	A	C	C	G	G	A	G	T	C	T	G	C	A	C	C	C	T	A	G	C	C	T	G	0	0	P	M
SEN_RT_038.2015	2015	T	A	C	T	C	C	A	G	T	C	T	A	C	C	C	C	C	T	A	G	C	C	T	G	0	0	P	M
SEN_RT_039.2015	2015	T	A	C	T	C	C	A	G	T	C	T	A	C	A	C	A	C	A	C	G	C	T	T	G	0	0	P	M
SEN_RT_043.2015	2015	T	A	T	T	G	C	A	G	A	T	T	G	C	A	C	A	T	A	A	G	C	T	T	G	0	0	P	M
SEN_RT_044.2015	2015	T	A	T	C	G	G	A	G	T	T	T	A	C	A	A	C	T	T	C	A	A	C	T	G	0	0	P	M
SEN_RT_045.2015	2015	C	A	T	T	C	C	A	A	A	T	C	G	T	A	C	C	C	A	C	G	A	T	T	G	0	0	P	M
SEN_RT_052.2013	2013	T	G	C	T	C	G	G	G	A	C	T	G	T	A	A	A	T	A	A	G	C	C	T	G	0	0	P	M
SEN_RT_055.2013	2013	T	A	C	T	G	G	A	G	A	C	C	G	T	A	A	C	T	T	A	G	C	T	T	G	0	0	P	M
SEN_RT_056.2013	2013	C	A	C	T	C	C	A	G	A	C	T	G	C	A	C	A	C	A	C	G	C	T	T	G	0	0	P	M
SEN_RT_060.2013	2013	T	A	T	T	C	G	A	G	A	T	C	G	C	A	C	C	C	T	A	A	C	T	T	G	0	0	P	M
SEN_RT_061.2013	2013	T	A	C	T	G	C	A	G	A	T	T	A	C	A	C	A	C	A	A	G	C	T	T	G	0	0	P	M
SEN_RT_064.2013	2013	T	A	T	T	G	G	A	G	T	T	C	G	C	A	C	A	C	T	C	A	C	T	T	G	0	0	P	M
SEN_RT_067.2013	2013	C	A	T	T	C	G	A	G	A	T	C	G	C	C	C	C	T	T	C	G	A	T	T	G	0	0	P	M
SEN_RT_068.2013	2013	C	A	C	T	G	C	A	G	T	T	C	A	C	A	C	A	C	A	A	G	A	C	T	G	0	0	P	M
SEN_RT_071.2013	2013	T	A	C	T	C	C	A	A	T	T	T	A	T	C	A	C	T	T	A	G	C	C	T	G	0	0	P	M
SEN_RT_072.2013	2013	T	A	T	T	G	C	G	G	A	C	T	G	C	A	A	A	T	T	C	G	A	C	T	G	0	0	P	M
SEN_RT_077.2013	2013	T	A	T	T	C	G	G	G	A	T	C	G	C	C	A	C	T	A	A	G	A	C	T	G	0	0	P	M
SEN_RT_078.2013	2013	T	A	T	T	G	C	A	G	A	T	T	G	C	A	C	A	T	A	A	G	C	T	T	G	0	0	P	M
SEN_RT_079.2013	2013	T	A	C	T	C	C	A	G	A	T	C	A	C	A	A	C	T	A	A	G	C	T	T	G	0	0	P	M
SEN_RT_081.2012	2012	T	A	C	C	G	C	G	G	A	C	C	A	C	A	A	A	T	A	A	G	C	T	T	G	0	0	P	M
SEN_RT_082.2012	2012	T	A	C	T	C	G	A	G	T	C	T	A	C	A	C	A	C	A	A	G	A	T	T	G	0	0	P	M
SEN_RT_084.2012	2012	T	A	C	T	G	C	A	G	T	C	T	A	T	C	C	C	T	A	A	G	A	T	T	G	0	0	P	M
SEN_RT_090.2012	2012	C	A	T	T	C	C	G	G	T	T	T	G	T	A	A	C	C	T	A	A	A	C	T	G	0	0	P	M
SEN_RT_094.2012	2012	T	A	C	T	G	C	A	A	A	C	T	G	C	A	A	C	T	A	A	G	A	T	T	G	0	0	P	M
SEN_RT_097.2012	2012	C	A	C	T	G	C	A	G	T	C	C	G	C	A	A	A	T	A	C	G	C	T	T	G	0	0	P	M
SEN_RT_098.2012	2012	C	A	C	T	C	G	A	G	T	T	T	G	C	A	C	C	T	A	C	G	C	T	T	G	0	0	P	M
SEN_RT_100.2012	2012	T	A	C	T	C	G	A	G	T	T	T	A	T	A	C	C	C	T	C	G	C	T	T	G	0	0	P	M
SEN_RT_110.2012	2012	T	A	C	T	C	G	A	G	T	C	C	G	T	C	A	A	T	A	C	G	A	T	T	G	0	0	P	M
SEN_RT_113.2012	2012	T	A	C	T	C	G	A	G	T	T	T	A	T	A	C	C	T	T	A	G	A	C	T	G	0	0	P	M
SEN_RT_119.2012	2012	C	A	T	T	C	G	A	G	T	T	C	G	T	A	C	C	C	A	A	G	C	C	T	G	0	0	P	M
SEN_RT_121.2012	2012	T	A	T	T	C	C	G	G	A	T	C	G	T	A	C	A	C	A	A	G	C	C	T	G	0	0	P	M
SEN_RT_123.2012	2012	T	A	T	T	G	G	G	G	A	T	C	G	C	A	A	C	C	T	A	G	A	T	T	G	0	0	P	M
SEN_RT_125.2012	2012	T	A	C	T	C	C	G	G	A	C	C	G	C	A	C	C	T	T	A	G	A	T	T	G	0	0	P	M
SEN_RT_126.2012	2012	C	A	T	T	C	C	A	G	T	T	C	G	C	C	A	C	C	T	A	A	C	T	T	G	0	0	P	M
SEN_RT_127.2012	2012	T	A	T	T	C	C	G	A	A	T	T	A	C	A	A	C	T	A	A	G	A	C	T	G	0	0	P	M
SEN_RT_130.2013	2013	T	A	C	C	C	C	G	G	A	T	C	G	T	C	C	A	T	A	A	G	A	C	T	G	0	0	P	M
SEN_RT_132.2013	2013	C	A	T	T	C	G	A	G	T	T	C	G	T	A	C	C	C	A	C	G	C	C	T	G	0	0	P	M
SEN_RT_134.2013	2013	C	A	C	C	C	C	A	G	A	T	T	A	C	A	C	C	T	T	A	G	A	C	T	G	0	0	P	M
SEN_RT_136.2013	2013	T	A	C	T	G	C	A	G	T	C	C	G	T	A	A	C	C	A	A	G	A	T	T	G	0	0	P	M
SEN_RT_137.2013	2013	T	A	T	T	G	C	A	G	T	T	T	A	T	A	C	C	T	T	A	A	A	T	T	G	0	0	P	M
SEN_RT_140.2013	2013	C	A	T	T	C	C	G	G	A	T	T	A	C	C	C	C	C	A	A	G	C	C	T	G	0	0	P	M
SEN_RT_144.2014	2014	C	A	C	T	C	C	G	G	A	T	C	A	C	A	A	A	C	A	C	G	A	T	T	G	0	0	P	M
SEN_RT_145.2013	2013	T	A	C	T	C	G	A	G	A	T	C	G	C	A	C	A	C	A	C	G	C	T	T	G	0	0	P	M
SEN_RT_146.2013	2013	C	A	C	T	G	C	A	G	T	C	T	A	T	C	A	C	C	A	C	A	C	C	T	G	0	0	P	M
SEN_RT_147.2013	2013	C	A	T	T	C	G	A	G	T	T	T	A	C	A	A	C	T	A	A	G	A	T	T	G	0	0	P	M
SEN_RT_149.2013	2013	T	G	C	T	C	G	A	G	T	T	T	G	T	C	A	A	C	T	C	G	C	C	T	G	0	0	P	M
SEN_RT_152.2013	2013	T	A	C	T	C	G	G	G	T	T	T	A	T	A	C	C	C	T	A	G	C	T	T	G	0	0	P	M
SEN_RT_156.2013	2013	C	A	C	C	C	C	G	G	T	C	C	A	C	C	A	A	T	T	A	G	A	C	T	G	0	0	P	M
SEN_RT_157.2013	2013	C	A	C	T	C	C	A	G	T	C	T	A	C	A	C	A	C	T	A	G	C	C	T	G	0	0	P	M
SEN_RT_161.2015	2015	T	A	C	T	G	C	A	G	T	C	T	A	C	C	C	C	C	A	A	G	C	C	T	G	0	0	P	M
SEN_RT_162.2015	2015	C	A	T	T	C	C	A	G	A	C	T	G	C	A	C	A	C	A	A	G	C	T	T	G	0	0	P	M
SEN_RT_163.2015	2015	T	A	T	T	G	C	A	G	A	T	T	G	C	A	C	A	T	A	A	G	C	T	T	G	0	0	P	M
SEN_RT_164.2015	2015	T	A	T	T	G	C	A	G	A	T	T	G	C	A	C	A	T	A	A	G	C	T	T	G	0	0	P	M
SEN_RT_172.2015	2015	T	A	C	T	C	C	A	G	T	C	T	A	C	C	C	C	C	T	A	G	C	C	T	G	0	0	P	M
SEN_RT_175.2013	2013	T	G	C	C	G	C	A	G	A	C	C	G	T	A	C	C	T	T	C	G	A	T	T	G	0	0	P	M
SEN_RT_181.2013	2013	T	A	C	T	G	C	A	A	A	C	C	A	C	C	C	A	C	A	C	G	A	C	T	G	0	0	P	M
SEN_RT_185.2013	2013	C	A	T	T	C	G	A	G	A	T	C	G	C	A	C	A	C	T	A	G	C	T	T	G	0	0	P	M
SEN_RT_186.2013	2013	T	A	T	T	C	C	A	G	T	T	T	G	T	A	A	C	T	T	C	A	A	C	T	G	0	0	P	M
SEN_RT_188.2013	2013	T	A	C	T	C	G	A	G	T	C	T	A	C	A	A	C	C	A	C	A	A	T	T	G	0	0	P	M
SEN_RT_191.2013	2013	T	A	C	T	C	C	A	G	A	C	T	G	T	A	C	C	C	T	A	G	C	T	T	G	0	0	P	M
SEN_RT_201.2013	2013	C	A	T	T	C	G	A	G	A	T	C	G	C	A	C	A	C	T	A	G	C	T	T	G	0	0	P	M
SEN_RT_202.2014	2014	C	A	T	T	C	G	A	G	A	T	C	G	C	A	C	A	C	T	A	G	C	T	T	G	0	0	P	M
SEN_RT_203.2014	2014	T	A	C	T	C	C	A	G	A	C	C	G	T	A	C	C	T	T	A	G	A	T	T	G	0	0	P	M
SEN_RT_207.2014	2014	C	A	C	T	C	C	A	G	T	C	T	A	C	A	C	A	C	T	A	G	C	C	T	G	0	0	P	M
SEN_RT_208.2014	2014	T	A	C	T	C	C	G	G	T	T	T	A	C	A	A	C	C	A	C	A	A	T	T	G	0	0	P	M
SEN_RT_209.2014	2014	T	G	C	T	C	G	G	G	T	T	C	G	C	A	C	A	C	A	C	G	C	T	T	G	0	0	P	M
SEN_RT_218.2013	2013	C	A	T	T	G	C	G	G	A	C	T	G	C	A	A	A	T	T	C	G	C	C	T	G	0	0	P	M
SEN_RT_219.2013	2013	C	A	T	T	C	C	G	G	A	T	T	A	C	C	C	C	C	A	A	G	C	C	T	G	0	0	P	M
SEN_RT_222.2013	2013	C	A	T	T	C	C	A	G	T	T	T	G	T	A	A	A	T	A	A	G	A	C	T	G	0	0	P	M
SEN_RT_231.2013	2013	T	A	T	T	G	C	A	G	A	T	T	G	C	C	A	C	T	T	C	G	C	C	T	G	0	0	P	M
SEN_RT_234.2013	2013	T	A	C	T	C	C	G	G	A	T	T	G	C	C	C	A	C	T	C	A	A	T	T	G	0	0	P	M
SEN_RT_241.2015	2015	T	A	T	T	G	C	A	G	A	T	T	G	C	A	C	A	T	A	A	G	C	T	T	G	0	0	P	M
SEN_RT_242.2015	2015	T	A	T	T	G	C	A	G	A	T	T	G	C	A	C	A	T	A	A	G	C	T	T	G	0	0	P	M
SEN_RT_245.2015	2015	T	A	T	T	G	C	A	G	A	T	T	G	C	A	C	A	T	A	A	G	C	T	T	G	0	0	P	M
SEN_RT_246.2015	2015	C	A	C	T	C	C	A	G	A	C	T	G	T	C	C	C	C	A	A	G	C	T	T	G	0	0	P	M
SEN_RT_247.2015	2015	T	A	C	C	G	C	A	G	A	C	T	G	C	A	C	A	T	A	A	G	A	T	T	G	0	0	P	M
SEN_RT_248.2015	2015	T	G	C	T	C	C	A	G	A	C	C	A	T	A	C	A	C	T	A	G	A	T	T	G	0	0	P	M
SEN_RT_251.2015	2015	T	A	T	T	G	C	G	A	T	C	C	A	C	C	A	C	C	A	A	G	A	T	T	G	0	0	P	M
SEN_RT_254.2015	2015	T	A	C	T	C	G	A	G	A	T	C	G	C	A	C	A	C	A	C	G	C	T	T	G	0	0	P	M
SEN_RT_259.2015	2015	T	A	C	T	G	C	A	G	A	C	C	G	C	A	C	C	C	A	C	G	C	C	T	G	0	0	P	M
SEN_RT_260.2015	2015	T	A	T	T	C	C	A	A	A	C	C	G	T	A	A	C	T	A	A	G	C	T	T	G	0	0	P	M
SEN_RT_262.2015	2015	C	G	C	T	C	C	A	G	T	T	T	A	T	A	C	C	T	A	A	G	C	C	T	G	0	0	P	M
SEN_RT_264.2015	2015	T	G	C	T	C	G	A	G	T	T	T	G	C	C	C	A	T	T	C	G	A	T	T	G	0	0	P	M
SEN_RT_268.2015	2015	T	A	C	C	C	C	A	G	A	C	C	G	C	A	C	C	T	T	C	A	C	T	T	G	0	0	P	M
SEN_RT_272.2015	2015	C	G	C	C	G	C	A	G	T	C	C	A	C	C	C	A	C	T	A	G	A	C	T	G	0	0	P	M
SEN_RT_273.2015	2015	T	A	C	T	C	C	G	G	A	T	T	G	C	A	C	C	C	T	C	G	A	T	T	G	0	0	P	M
SEN_RT_278.2015	2015	C	A	C	T	C	C	A	G	A	T	T	A	T	A	A	C	T	T	C	G	C	C	T	G	0	0	P	M
SEN_RT_283.2015	2015	C	A	C	T	C	G	G	G	T	C	T	G	C	A	C	C	T	T	A	G	A	C	T	G	0	0	P	M
SEN_RT_289.2015	2015	T	A	T	T	G	C	A	G	A	T	T	G	C	A	C	A	T	A	A	G	C	T	T	G	0	0	P	M
SEN_RT_290.2015	2015	T	A	C	T	C	C	A	G	T	C	T	A	C	A	A	C	C	T	A	G	C	T	T	G	0	0	P	M
SEN_RT_294.2015	2015	C	A	C	T	C	C	G	G	A	C	C	A	C	A	C	A	T	T	A	G	C	T	T	G	0	0	P	M
SEN_RT_307.2015	2015	C	A	C	T	C	G	G	G	T	C	T	G	C	A	C	C	T	T	A	G	A	C	T	G	0	0	P	M
SEN_RT_309.2015	2015	T	A	C	T	C	C	A	G	A	C	C	G	T	A	C	C	C	T	A	G	A	T	T	G	0	0	P	M
SEN_RT_312.2015	2015	C	A	T	T	C	C	A	A	A	T	C	G	T	A	C	C	C	A	C	G	A	T	T	G	0	0	P	M
SEN_RT_315.2014	2014	T	A	C	C	C	G	G	G	T	T	T	A	T	A	A	C	T	A	A	G	C	C	T	G	0	0	P	M
SEN_RT_318.2014	2014	T	A	C	T	C	G	A	G	T	T	T	A	T	A	C	C	T	T	A	G	C	C	T	G	0	0	P	M
SEN_RT_321.2014	2014	C	A	T	T	G	C	A	G	A	C	C	G	C	A	C	C	C	T	A	A	C	C	T	G	0	0	P	M
SEN_RT_322.2014	2014	T	A	T	C	C	G	A	G	T	T	T	A	T	A	C	A	T	T	C	A	C	T	T	G	0	0	P	M
SEN_RT_324.2014	2014	T	A	C	T	C	C	A	G	A	T	T	G	C	A	A	C	T	A	A	G	A	T	T	G	0	0	P	M
SEN_RT_327.2014	2014	T	A	C	T	C	G	G	A	T	C	C	G	C	A	A	C	T	A	A	G	A	C	T	G	0	0	P	M
SEN_RT_334.2015	2015	T	A	T	T	G	C	A	G	A	T	T	G	C	A	C	A	T	A	A	G	C	T	T	G	0	0	P	M
SEN_RT_335.2015	2015	C	A	C	C	C	G	G	A	A	T	T	A	C	C	A	A	C	A	A	G	C	T	T	G	0	0	P	M
SEN_RT_336.2015	2015	T	A	C	T	C	C	A	G	A	T	T	A	C	C	A	C	C	A	A	A	C	C	T	G	0	0	P	M
SEN_RT_339.2015	2015	T	A	C	T	G	C	A	G	A	T	T	G	C	A	A	C	C	A	A	G	C	T	T	G	0	0	P	M
SEN_RT_340.2015	2015	T	A	C	T	G	C	A	G	A	C	T	G	C	C	C	C	C	T	C	G	C	T	T	G	0	0	P	M
SEN_RT_341.2015	2015	T	A	C	C	C	G	A	G	T	T	T	G	T	C	C	C	C	T	A	A	A	C	T	G	0	0	P	M
SEN_RT_342.2015	2015	T	A	C	T	G	G	G	G	A	C	C	A	T	A	C	C	T	A	A	G	C	C	T	G	0	0	P	M
SEN_RT_343.2014	2014	T	A	C	T	C	G	G	G	A	T	C	A	C	A	A	C	T	A	C	G	C	C	T	G	0	0	P	M
SEN_RT_349.2015	2015	T	A	T	T	C	C	G	G	T	C	C	A	T	A	C	C	C	T	A	A	C	C	T	G	0	0	P	M
SEN_RT_352.2015	2015	T	A	T	T	C	C	A	G	T	T	T	A	T	A	A	C	T	T	A	G	C	C	T	G	0	0	P	M
SEN_RT_353.2015	2015	T	A	C	T	G	C	G	G	A	C	T	G	C	C	C	C	C	T	A	G	A	C	T	G	0	0	P	M
SEN_RT_354.2015	2015	T	A	C	T	G	C	G	G	A	C	T	G	C	C	C	C	C	T	A	G	A	C	T	G	0	0	P	M
SEN_RT_355.2015	2015	T	A	C	T	G	C	G	G	A	C	T	G	C	C	C	C	C	T	A	G	A	C	T	G	0	0	P	M
SEN_RT_356.2015	2015	T	A	T	T	C	C	A	G	T	T	C	G	T	A	A	C	C	T	A	G	C	T	T	G	0	0	P	M
SEN_RT_358.2015	2015	C	A	C	T	C	C	A	G	T	T	C	G	C	C	C	C	C	A	A	G	A	T	T	G	0	0	P	M
SEN_RT_359.2015	2015	C	A	C	T	C	G	A	G	A	C	T	G	C	A	C	C	T	A	C	G	C	T	T	G	0	0	P	M
SEN_RT_362.2015	2015	C	A	T	T	G	C	A	G	T	T	T	A	T	A	C	C	C	A	A	G	C	T	T	G	0	0	P	M
SEN_RT_364.2015	2015	T	A	T	T	C	C	A	G	A	C	T	G	C	A	C	C	C	T	C	G	A	T	T	G	0	0	P	M
SEN_RT_365.2015	2015	C	A	C	T	C	C	A	G	T	T	T	A	T	A	A	C	T	T	A	G	A	T	T	G	0	0	P	M
SEN_RT_369.2015	2015	C	A	T	T	C	C	A	A	A	T	C	G	T	A	C	C	C	A	C	G	A	T	T	G	0	0	P	M
SEN_RT_370.2015	2015	C	A	T	T	C	C	A	A	A	T	C	G	T	A	C	C	C	A	C	G	A	T	T	G	0	0	P	M
SEN_RT_376.2012	2012	C	A	C	T	C	C	A	G	A	C	T	A	C	C	C	C	T	A	C	A	C	C	T	G	0	0	P	M
SEN_RT_383.2012	2012	T	A	T	T	G	G	G	G	A	T	C	G	C	A	A	C	C	T	A	G	A	T	T	G	0	0	P	M
SEN_RT_385.2012	2012	T	A	C	T	C	C	A	G	A	T	T	G	T	A	A	C	T	A	C	G	A	C	T	G	0	0	P	M
SEN_RT_386.2012	2012	T	A	C	C	C	C	G	A	A	C	T	G	C	A	A	C	T	T	A	G	C	T	T	G	0	0	P	M
SEN_RT_391.2012	2012	T	A	C	T	C	C	A	G	A	T	T	A	C	A	A	C	C	T	A	G	C	C	T	G	0	0	P	M
SEN_RT_393.2012	2012	T	A	C	T	C	G	A	G	T	T	T	A	T	A	C	C	C	T	C	G	C	T	T	G	0	0	P	M
SEN_RT_402.2012	2012	T	A	T	T	C	C	A	G	A	T	T	A	C	A	C	C	C	A	A	G	C	C	T	G	0	0	P	M
SEN_RT_404.2012	2012	C	A	C	T	C	C	A	G	A	C	T	G	C	A	C	A	C	A	C	G	C	T	T	G	0	0	P	M
SEN_RT_406.2012	2012	T	A	C	T	C	G	A	A	A	T	C	A	T	A	A	C	T	T	C	G	A	C	T	G	0	0	P	M
SEN_RT_407.2013	2013	T	A	T	T	C	C	A	G	A	C	T	G	C	C	C	A	C	T	C	G	C	T	T	G	0	0	P	M
SEN_RT_410.2013	2013	C	A	T	T	C	G	G	G	A	T	T	A	C	A	A	A	T	A	C	G	C	C	T	G	0	0	P	M
SEN_RT_411.2013	2013	T	A	C	T	C	C	G	A	T	C	T	G	T	A	C	A	T	A	C	G	A	T	T	G	0	0	P	M
SEN_RT_412.2013	2013	T	A	T	T	G	C	A	G	A	T	T	G	C	A	C	A	T	A	A	G	C	T	T	G	0	0	P	M
SEN_RT_418.2013	2013	C	A	C	C	G	C	G	A	A	T	C	A	C	A	C	C	C	A	C	G	C	T	T	G	0	0	P	M
SEN_RT_424.2013	2013	C	A	C	T	C	C	A	G	A	C	T	G	C	A	C	A	C	A	C	G	C	T	T	G	0	0	P	M
SEN_RT_432.2013	2013	T	A	C	T	C	C	A	G	A	T	T	G	C	A	A	A	T	A	C	G	A	T	T	G	0	0	P	M
SEN_RT_434.2013	2013	C	A	C	T	C	C	A	G	A	C	T	G	C	A	C	A	C	A	C	G	C	T	T	G	0	0	P	M
SEN_RT_435.2013	2013	T	A	C	T	C	C	G	G	A	C	C	G	C	A	C	A	C	A	A	G	A	T	T	G	0	0	P	M
SEN_RT_437.2013	2013	T	A	C	T	C	C	A	G	T	C	C	G	T	C	C	C	T	A	C	G	A	T	T	G	0	0	P	M
SEN_RT_438.2013	2013	T	A	C	T	C	C	A	G	T	C	C	G	T	C	C	C	T	A	C	G	A	T	T	G	0	0	P	M
SEN_RT_440.2013	2013	T	A	C	C	C	C	A	G	T	C	T	A	C	A	A	C	C	A	A	G	C	C	T	G	0	0	P	M
SEN_RT_443.2013	2013	T	G	C	T	C	C	A	G	A	C	T	A	T	A	A	C	T	A	C	G	A	C	T	G	0	0	P	M
SEN_RT_445.2013	2013	C	G	C	C	C	C	A	G	T	C	T	A	C	A	A	C	T	A	C	G	C	T	T	G	0	0	P	M
SEN_RT_448.2013	2013	T	G	C	C	C	G	A	G	T	T	T	G	C	C	C	C	C	A	A	A	C	T	T	G	0	0	P	M
SEN_RT_450.2013	2013	T	G	C	C	C	C	A	A	A	C	T	G	C	A	C	C	T	T	A	A	A	C	T	G	0	0	P	M
SEN_RT_451.2013	2013	T	G	C	T	C	G	A	G	A	C	T	G	C	A	A	A	T	T	A	G	A	T	T	G	0	0	P	M
SEN_RT_455.2013	2013	T	G	C	T	C	C	A	G	A	T	C	A	T	C	A	C	C	A	A	G	C	T	T	G	0	0	P	M
SEN_RT_456.2013	2013	T	G	C	T	C	C	A	G	A	C	C	G	T	A	A	A	C	A	C	G	A	T	T	G	0	0	P	M
SEN_RT_466.2013	2013	C	A	C	T	C	G	A	G	T	T	T	A	T	C	A	C	C	A	C	G	C	C	T	G	0	0	P	M
SEN_RT_468.2013	2013	T	A	T	T	G	C	A	G	T	C	C	G	T	A	C	C	T	T	A	G	A	C	T	G	0	0	P	M
SEN_RT_470.2013	2013	C	A	C	T	C	C	A	G	T	T	T	A	T	C	A	C	T	A	C	G	A	C	T	G	0	0	P	M
SEN_RT_472.2013	2013	C	A	T	T	C	G	A	G	A	T	T	A	T	A	A	C	C	A	A	G	A	C	T	G	0	0	P	M
SEN_RT_474.2013	2013	C	A	C	T	C	C	G	A	T	T	T	G	C	C	C	C	C	A	C	G	A	T	T	G	0	0	P	M
SEN_RT_476.2013	2013	C	A	T	T	C	G	A	G	A	T	T	G	T	C	C	C	C	T	A	G	A	C	T	G	0	0	P	M
SEN_RT_477.2013	2013	T	A	C	T	C	G	A	A	A	C	T	G	C	A	A	C	C	A	C	A	C	C	T	G	0	0	P	M
SEN_RT_478.2013	2013	T	A	T	T	C	G	G	G	A	T	C	G	C	C	A	C	T	A	A	G	A	C	T	G	0	0	P	M
SEN_RT_481.2013	2013	C	A	T	T	G	C	G	G	A	C	T	G	C	A	A	A	T	T	C	G	C	C	T	G	0	0	P	M
SEN_RT_482.2013	2013	T	A	T	T	C	G	G	G	T	T	C	G	C	A	A	C	C	T	C	G	A	C	T	G	0	0	P	M
SEN_RT_484.2013	2013	T	A	C	T	C	C	A	G	T	C	T	A	T	C	C	A	C	T	A	A	A	T	T	G	0	0	P	M
SEN_RT_485.2013	2013	T	A	C	T	C	G	A	G	A	T	C	G	C	A	C	A	C	A	C	G	C	T	T	G	0	0	P	M
SEN_RT_486.2013	2013	T	A	C	T	G	C	G	G	A	T	T	A	T	A	C	A	C	T	A	A	A	C	T	G	0	0	P	M
SEN_RT_488.2013	2013	T	A	T	T	C	G	A	G	A	C	T	G	C	C	A	A	C	A	C	G	C	T	T	G	0	0	P	M
SEN_RT_489.2013	2013	C	A	T	T	G	C	A	G	A	T	T	G	C	A	A	A	C	T	A	G	A	C	T	G	0	0	P	M
SEN_RT_490.2013	2013	T	A	C	T	C	C	G	G	A	C	T	G	T	A	C	C	C	T	A	G	C	T	T	G	0	0	P	M
SEN_RT_491.2013	2013	T	A	C	T	G	C	A	A	A	C	T	A	C	C	C	A	C	A	C	G	A	C	T	G	0	0	P	M
SEN_RT_499.2013	2013	T	A	C	C	G	C	A	G	T	C	C	G	T	C	A	A	C	A	A	G	C	T	T	G	0	0	P	M
SEN_RT_500.2013	2013	T	A	T	T	C	G	G	G	A	T	C	G	C	C	A	C	T	A	A	G	A	C	T	G	0	0	P	M
SEN_RT_504.2013	2013	C	A	C	T	C	C	G	G	T	C	C	G	C	A	C	C	T	A	C	G	C	T	T	G	0	0	P	M
SEN_RT_505.2013	2013	T	A	C	T	G	G	A	A	A	C	T	G	T	C	C	C	C	T	A	G	A	C	T	G	0	0	P	M
SEN_RT_506.2013	2013	T	A	T	T	C	G	A	A	A	T	T	A	C	C	C	C	C	A	A	G	A	C	T	G	0	0	P	M
SEN_RT_509.2013	2013	T	A	C	T	G	C	G	A	A	T	C	A	T	A	C	C	C	T	A	G	A	C	T	G	0	0	P	M
SEN_RT_511.2013	2013	T	A	T	T	C	C	A	G	T	C	T	A	C	A	C	C	T	A	A	G	A	T	T	G	0	0	P	M
SEN_RT_519.2013	2013	T	A	T	T	G	G	A	G	T	C	T	G	C	A	C	C	T	A	A	G	A	C	T	G	0	0	P	M
SEN_RT_520.2013	2013	C	A	C	T	C	C	A	G	T	C	T	A	C	A	C	A	C	T	A	G	C	C	T	G	0	0	P	M
SEN_RT_524.2013	2013	T	A	C	T	C	G	A	G	A	T	C	G	C	A	C	A	C	A	C	G	C	T	T	G	0	0	P	M
SEN_RT_525.2013	2013	T	A	C	T	C	C	G	G	A	T	T	G	C	C	C	C	C	A	C	G	C	C	T	G	0	0	P	M
SEN_RT_526.2013	2013	T	A	C	T	G	C	A	G	T	C	T	G	C	A	C	C	T	A	A	G	A	T	T	G	0	0	P	M
SEN_RT_528.2013	2013	T	A	C	T	C	G	A	G	T	T	T	A	T	A	A	C	C	T	C	G	C	T	T	G	0	0	P	M
SEN_RT_530.2013	2013	C	A	T	T	C	C	G	G	T	C	T	A	T	A	C	C	C	T	A	G	C	C	T	G	0	0	P	M
SEN_RT_531.2013	2013	T	A	C	C	C	C	G	G	T	C	C	G	T	A	C	A	T	T	A	G	A	C	T	G	0	0	P	M
SEN_RT_533.2013	2013	C	A	C	T	C	C	A	G	T	C	T	A	C	A	C	A	C	T	A	G	C	C	T	G	0	0	P	M
SEN_RT_539.2013	2013	C	A	T	T	C	G	A	G	A	T	C	G	C	A	C	A	C	T	A	G	C	T	T	G	0	0	P	M
SEN_RT_543.2013	2013	T	A	C	T	G	G	G	G	A	T	C	G	C	A	C	C	C	T	A	G	A	C	T	G	0	0	P	M
SEN_RT_558.2014	2014	T	A	T	T	C	G	G	G	T	T	T	G	T	A	C	C	C	T	A	G	C	C	T	G	0	0	P	M
SEN_RT_566.2014	2014	C	A	T	T	C	G	A	G	T	T	C	G	T	A	C	C	C	A	C	G	C	C	T	G	0	0	P	M
SEN_RT_571.2014	2014	T	A	C	T	G	G	A	G	A	T	T	A	T	A	C	C	C	A	A	G	C	C	T	G	0	0	P	M
SEN_RT_577.2014	2014	C	A	C	C	C	G	A	G	A	T	C	G	C	A	A	C	T	T	A	G	A	T	T	G	0	0	P	M
SEN_RT_578.2014	2014	C	A	C	T	C	C	G	G	T	C	C	G	T	A	C	A	T	A	A	G	A	C	T	G	0	0	P	M
SEN_RT_580.2014	2014	T	A	T	T	G	C	A	G	A	T	T	G	C	A	C	A	T	A	A	G	C	T	T	G	0	0	P	M
SEN_RT_585.2014	2014	T	A	T	T	C	G	A	A	A	T	C	G	C	C	C	C	C	T	C	G	C	C	T	G	0	0	P	M
SEN_RT_588.2014	2014	T	A	C	T	C	C	A	G	A	T	C	G	C	C	C	C	C	A	A	G	C	T	T	G	0	0	P	M
SEN_RT_591.2014	2014	T	A	T	T	G	C	A	G	A	T	T	G	C	A	C	A	T	A	A	G	C	T	T	G	0	0	P	M
SEN_RT_592.2014	2014	C	A	C	T	G	G	G	G	A	T	C	G	T	A	C	C	T	T	C	A	C	C	T	G	0	0	P	M
SEN_RT_593.2014	2014	T	A	C	T	C	C	A	G	A	T	C	G	C	C	C	C	C	A	A	G	C	T	T	G	0	0	P	M
SEN_RT_594.2014	2014	C	A	T	T	C	G	A	G	T	T	C	G	T	A	C	C	C	A	C	G	C	C	T	G	0	0	P	M
SEN_RT_595.2014	2014	C	A	C	T	C	C	A	G	A	C	T	A	T	A	C	C	T	T	A	G	A	C	T	G	0	0	P	M
SEN_RT_599.2014	2014	T	A	C	T	C	C	A	G	T	T	T	G	C	A	C	C	C	T	A	G	C	T	T	G	0	0	P	M
SEN_RT_603.2014	2014	C	A	C	T	G	C	A	G	A	T	T	A	C	A	C	C	C	A	A	G	A	T	T	G	0	0	P	M
SEN_RT_604.2014	2014	T	A	C	T	C	C	A	G	A	T	C	G	T	A	C	C	C	A	A	G	A	C	T	G	0	0	P	M
SEN_RT_605.2014	2014	T	A	C	C	C	G	A	G	A	T	T	G	C	A	C	C	T	T	A	G	C	T	T	G	0	0	P	M
SEN_RT_606.2014	2014	T	A	C	T	G	G	A	G	A	T	T	G	C	A	C	C	C	T	A	A	A	T	T	G	0	0	P	M
SEN_RT_608.2014	2014	T	A	C	T	C	C	A	G	T	T	C	G	C	C	C	C	T	T	A	G	A	T	T	G	0	0	P	M
SEN_RT_610.2014	2014	T	A	T	T	G	C	A	G	A	C	C	A	C	A	C	A	C	A	A	G	A	T	T	G	0	0	P	M
SEN_RT_611.2014	2014	T	A	C	T	C	C	G	G	T	C	T	A	C	A	A	C	C	A	A	G	A	T	T	G	0	0	P	M
SEN_RT_612.2014	2014	C	A	C	T	C	C	A	G	A	T	T	G	T	A	C	A	C	T	A	A	A	T	T	G	0	0	P	M
SEN_RT_615.2014	2014	T	A	C	C	C	C	G	G	T	C	T	G	C	A	A	A	T	A	A	G	C	C	T	G	0	0	P	M
SEN_RT_616.2014	2014	T	A	C	T	C	C	G	A	T	T	C	A	C	A	C	C	T	A	A	A	A	T	T	G	0	0	P	M
SEN_RT_617.2014	2014	C	A	C	T	C	C	A	G	T	C	T	A	C	A	C	A	C	T	A	G	C	C	T	G	0	0	P	M
SEN_RT_620.2014	2014	T	A	T	T	C	G	A	G	T	T	T	G	C	A	C	A	T	A	A	G	C	T	T	G	0	0	P	M
SEN_RT_622.2014	2014	T	A	C	T	C	G	G	G	A	C	C	G	T	A	C	C	T	A	A	G	C	C	T	G	0	0	P	M
SEN_RT_629.2015	2015	C	A	C	T	C	C	G	G	A	T	T	A	C	C	C	C	C	T	A	G	C	C	T	G	0	0	P	M
SEN_RT_630.2015	2015	C	A	C	T	C	C	G	G	A	T	T	A	C	C	C	C	C	T	A	G	C	C	T	G	0	0	P	M
SEN_RT_631.2015	2015	T	A	C	T	G	C	G	G	A	T	T	G	C	A	A	C	T	T	A	G	C	T	T	G	0	0	P	M
SEN_RT_634.2015	2015	T	A	C	T	G	C	G	G	A	C	T	A	C	A	C	C	T	T	C	G	A	T	T	G	0	0	P	M
SEN_RT_637.2015	2015	C	A	C	T	C	G	A	G	A	C	T	G	C	A	C	C	C	T	A	G	C	C	T	G	0	0	P	M
SEN_RT_640.2015	2015	T	A	C	T	C	G	A	G	A	T	C	G	T	C	C	C	C	A	A	G	A	T	T	G	0	0	P	M
SEN_RT_642.2015	2015	C	A	C	T	C	G	A	G	A	C	T	G	C	A	C	C	C	T	A	G	C	C	T	G	0	0	P	M
SEN_RT_643.2015	2015	T	A	T	T	C	G	A	G	T	T	T	A	C	C	C	C	C	T	A	G	C	T	T	G	0	0	P	M
SEN_RT_648.2015	2015	C	A	C	T	C	G	G	G	A	T	T	A	C	C	A	C	C	T	C	G	A	T	T	G	0	0	P	M
SEN_RT_649.2015	2015	T	A	T	T	C	C	G	G	A	T	T	A	C	A	A	A	T	T	A	G	C	T	T	G	0	0	P	M
SEN_RT_656.2015	2015	C	A	C	T	C	G	A	G	A	T	T	A	C	A	C	C	T	A	C	G	C	C	T	G	0	0	P	M
SEN_RT_657.2015	2015	T	A	C	T	C	C	G	G	A	C	T	A	C	A	C	C	C	A	C	G	C	C	T	G	0	0	P	M
SEN_RT_658.2015	2015	T	A	C	T	C	C	G	A	A	C	C	A	C	A	C	C	C	T	A	G	A	C	T	G	0	0	P	M
SEN_RT_660.2015	2015	T	A	C	C	C	C	G	G	T	C	C	A	C	C	A	A	T	A	A	G	A	C	T	G	0	0	P	M
SEN_RT_661.2015	2015	T	A	T	C	G	C	G	G	A	C	T	A	C	A	C	C	C	A	C	G	A	C	T	G	0	0	P	M
SEN_RT_662.2015	2015	C	A	T	T	C	C	G	G	A	C	T	A	T	C	A	A	T	A	A	G	C	T	T	G	0	0	P	M
SEN_RT_663.2015	2015	C	G	C	T	C	C	A	G	T	T	T	G	C	A	A	C	T	A	A	G	A	T	T	G	0	0	P	M
SEN_RT_665.2015	2015	C	A	C	T	C	C	A	G	A	C	T	G	C	A	C	A	C	A	C	G	C	T	T	G	0	0	P	M
SEN_RT_670.2015	2015	T	A	C	T	C	C	G	A	A	T	C	G	C	A	C	C	C	A	A	G	A	T	T	G	0	0	P	M
SEN_RT_674.2015	2015	C	A	T	T	C	G	A	A	A	C	T	G	C	C	C	C	C	T	A	G	A	C	T	G	0	0	P	M
SEN_RT_675.2015	2015	T	A	T	T	C	C	A	G	A	T	T	G	T	C	C	A	T	T	A	G	A	C	T	G	0	0	P	M
SEN_RT_676.2015	2015	C	A	C	T	C	C	A	G	T	T	T	G	C	C	C	A	C	A	A	G	A	T	T	G	0	0	P	M
SEN_RT_677.2015	2015	T	A	T	T	C	C	G	G	A	T	C	G	T	A	A	A	T	T	A	A	C	C	T	G	0	0	P	M
SEN_RT_678.2015	2015	T	A	C	T	C	C	A	G	T	C	T	A	C	C	C	C	T	A	A	G	C	C	T	G	0	0	P	M
SEN_RT_679.2015	2015	T	A	C	T	C	C	A	G	A	C	C	G	T	A	C	C	T	A	A	G	A	T	T	G	0	0	P	M
SEN_RT_680.2015	2015	C	A	C	T	G	G	A	G	T	T	T	G	C	C	C	A	C	A	A	G	A	T	T	G	0	0	P	M
SEN_RT_684.2015	2015	T	A	C	T	C	C	A	G	A	T	T	A	C	A	C	C	C	A	C	G	A	C	T	G	0	0	P	M
SEN_RT_685.2015	2015	T	A	C	C	G	C	G	A	A	T	T	A	T	A	A	C	T	T	C	G	C	C	T	G	0	0	P	M
SEN_RT_686.2015	2015	C	A	T	T	C	G	A	G	A	C	T	G	C	A	C	C	T	A	A	G	C	T	T	G	0	0	P	M
SEN_RT_689.2015	2015	T	G	T	T	C	G	A	G	A	T	T	G	C	A	A	A	T	T	C	A	A	T	T	G	0	0	P	M
SEN_RT_690.2015	2015	T	G	T	T	C	G	A	G	A	T	T	G	C	A	A	A	T	T	C	A	A	T	T	G	0	0	P	M
SEN_RT_691.2015	2015	T	G	T	T	C	G	A	G	A	T	T	G	C	A	A	A	T	T	C	A	A	T	T	G	0	0	P	M
SEN_RT_692.2015	2015	T	A	C	T	C	C	G	G	T	C	C	A	T	A	A	C	C	T	A	G	A	T	T	G	0	0	P	M
SEN_RT_693.2015	2015	T	A	C	T	G	C	A	G	A	C	T	G	C	C	C	C	C	T	C	G	C	T	T	G	0	0	P	M
SEN_RT_694.2015	2015	T	A	T	T	C	C	A	G	A	T	T	G	T	C	C	A	T	T	A	G	A	C	T	G	0	0	P	M
SEN_RT_695.2015	2015	T	A	C	T	C	G	A	G	T	T	T	A	T	A	C	C	T	A	A	G	C	C	T	G	0	0	P	M
SEN_RT_698.2015	2015	T	A	C	T	G	G	G	G	A	T	T	G	T	A	C	C	C	A	A	G	C	C	T	G	0	0	P	M
SEN_RT_700.2015	2015	T	A	C	T	C	C	G	G	T	T	T	G	C	C	A	C	C	A	A	G	C	C	T	G	0	0	P	M
SEN_RT_701.2015	2015	C	A	T	C	C	G	A	G	T	C	T	A	C	A	A	C	T	T	C	G	C	C	T	G	0	0	P	M
SEN_RT_703.2015	2015	T	G	C	C	C	G	G	A	T	C	T	A	T	C	C	C	T	A	A	G	C	C	T	G	0	0	P	M
SEN_RT_704.2015	2015	T	A	C	T	G	G	G	G	A	T	T	G	T	A	C	C	C	A	A	G	C	C	T	G	0	0	P	M
SEN_RT_705.2015	2015	C	A	C	T	C	C	G	G	A	C	C	A	C	A	C	A	T	T	A	G	C	T	T	G	0	0	P	M
SEN_RT_706.2015	2015	T	A	C	T	G	G	G	G	T	C	T	A	C	A	C	C	T	T	A	G	C	C	T	G	0	0	P	M
SEN_RT_707.2015	2015	T	A	T	T	G	C	A	G	A	T	T	G	C	A	C	A	T	A	A	G	C	T	T	G	0	0	P	M
SEN_RT_709.2015	2015	T	A	C	T	C	C	A	G	T	C	T	A	T	A	A	A	C	A	A	G	A	T	T	G	0	0	P	M
SEN_RT_712.2015	2015	T	A	C	T	C	C	A	G	A	T	C	G	C	A	A	C	T	T	C	G	A	T	T	G	0	0	P	M
SEN_RT_713.2015	2015	T	A	T	T	C	C	A	G	T	C	C	A	C	C	A	C	T	A	A	G	A	C	T	G	0	0	P	M
SEN_RT_715.2015	2015	T	A	C	T	G	G	G	G	T	T	T	A	T	A	C	A	T	T	A	G	A	C	T	G	0	0	P	M
SEN_RT_718.2015	2015	T	A	C	T	C	C	A	A	A	C	T	A	C	A	A	C	C	A	C	G	A	C	T	G	0	0	P	M
SEN_RT_719.2015	2015	T	A	C	T	G	C	G	G	T	T	C	A	C	A	C	C	T	A	C	G	C	T	T	G	0	0	P	M
SEN_RT_720.2015	2015	C	G	C	T	C	G	A	G	A	T	C	A	C	A	C	C	C	T	C	A	A	C	T	G	0	0	P	M
SEN_RT_721.2015	2015	T	A	C	T	G	C	A	G	T	T	T	A	C	A	C	C	T	A	A	G	C	C	T	G	0	0	P	M
SEN_RT_722.2015	2015	C	A	C	C	C	C	G	G	A	T	C	A	C	A	C	C	T	A	A	G	C	T	T	G	0	0	P	M
SEN_RT_723.2015	2015	T	A	T	T	G	C	A	A	T	C	T	A	C	C	A	C	T	T	C	G	A	C	T	G	0	0	P	M
SEN_RT_725.2015	2015	T	A	T	T	C	G	G	G	T	T	C	G	T	C	C	C	C	A	C	G	C	T	T	G	0	0	P	M
SEN_RT_727.2015	2015	T	A	C	T	G	C	A	G	T	C	T	A	C	C	C	A	C	A	A	A	A	T	T	G	0	0	P	M
SEN_RT_728.2015	2015	T	G	T	T	C	G	G	G	T	T	T	A	T	C	A	C	T	A	A	A	A	C	T	G	0	0	P	M
SEN_RT_730.2015	2015	C	A	C	T	C	C	G	G	A	T	C	G	T	A	A	C	T	T	C	G	C	C	T	G	0	0	P	M
SEN_RT_731.2015	2015	T	A	C	C	C	G	A	G	T	T	T	G	T	A	A	C	C	T	A	G	A	T	T	G	0	0	P	M
SEN_RT_737.2015	2015	T	A	C	T	C	C	A	G	T	C	T	A	C	A	C	A	C	A	C	G	C	T	T	G	0	0	P	M
SEN_RT_738.2015	2015	T	A	C	T	G	C	G	G	A	C	T	G	C	C	C	C	C	T	A	G	A	C	T	G	0	0	P	M
SEN_RT_739.2015	2015	C	A	C	T	C	C	G	G	A	C	C	A	C	A	C	A	T	T	A	G	C	T	T	G	0	0	P	M
SEN_RT_742.2015	2015	C	A	C	T	C	C	A	G	T	T	T	A	T	A	A	C	T	T	A	G	A	T	T	G	0	0	P	M
SEN_RT_744.2015	2015	T	A	C	T	G	C	G	G	A	C	T	G	C	C	C	C	C	T	A	G	A	C	T	G	0	0	P	M
SEN_RT_745.2015	2015	T	A	C	T	C	C	G	G	T	C	C	A	C	C	A	C	T	A	A	G	A	C	T	G	0	0	P	M
SEN_RT_750.2015	2015	T	A	C	T	C	C	A	G	T	T	T	A	T	A	C	C	C	T	A	G	A	T	T	G	0	0	P	M
SEN_RT_751.2015	2015	T	A	T	T	C	C	A	G	T	T	C	G	T	A	A	C	C	T	A	G	C	T	T	G	0	0	P	M
SEN_RT_753.2015	2015	T	A	C	T	C	C	G	G	T	T	T	G	C	C	C	C	C	T	A	A	A	T	T	G	0	0	P	M
SEN_RT_755.2015	2015	T	A	T	C	C	C	A	G	T	T	C	G	T	A	C	C	C	A	C	G	C	C	T	G	0	0	P	M
SEN_RT_756.2015	2015	T	A	C	C	C	C	A	G	A	T	T	A	C	C	C	C	C	T	A	G	A	C	T	G	0	0	P	M
SEN_RT_759.2015	2015	C	A	T	T	C	G	A	G	A	T	C	G	C	A	C	A	C	T	A	G	C	T	T	G	0	0	P	M
SEN_RT_002.2014	2014	T	A	C	T	C	C	A	G	A	T	C	G	C	C	C	C	C	A	A	G	C	T	X	G	0	1	P	M
SEN_RT_010.2014	2014	T	A	C	T	C	C	A	G	A	T	C	G	C	C	C	C	C	A	A	G	C	T	X	G	0	1	P	M
SEN_RT_011.2014	2014	T	A	C	T	C	C	A	G	A	T	X	A	C	A	C	A	C	T	A	G	A	C	T	G	0	1	P	M
SEN_RT_012.2014	2014	T	A	T	T	G	C	A	G	T	C	C	X	C	A	A	A	T	A	A	G	C	T	T	G	0	1	P	M
SEN_RT_014.2014	2014	T	A	C	T	C	G	A	G	A	C	T	G	C	C	C	C	T	T	A	G	C	C	X	G	0	1	P	M
SEN_RT_019.2014	2014	T	A	C	T	C	C	A	G	A	T	X	G	C	C	C	A	C	A	A	G	A	T	T	G	0	1	P	M
SEN_RT_021.2014	2014	T	A	C	T	C	C	A	G	A	T	C	G	C	C	C	C	C	A	A	G	C	T	X	G	0	1	P	M
SEN_RT_023.2014	2014	T	A	C	T	G	C	A	A	T	C	X	A	C	C	A	C	C	A	A	G	C	C	T	G	0	1	P	M
SEN_RT_024.2014	2014	C	A	C	T	C	C	G	G	A	T	C	A	C	A	X	A	C	A	C	G	A	T	T	G	0	1	P	M
SEN_RT_046.2014	2014	T	A	C	T	C	G	A	G	A	C	C	X	C	C	C	A	C	A	C	G	C	T	T	G	0	1	P	M
SEN_RT_063.2013	2013	T	A	T	T	G	C	G	G	T	T	T	A	T	A	X	C	T	A	A	A	A	T	T	G	0	1	P	M
SEN_RT_065.2013	2013	C	A	T	C	G	C	G	G	A	T	C	X	C	C	C	A	C	T	A	G	C	T	T	G	0	1	P	M
SEN_RT_080.2012	2012	C	A	T	T	C	C	A	G	T	C	C	X	C	C	C	A	T	A	C	G	C	T	T	G	0	1	P	M
SEN_RT_085.2012	2012	T	A	T	C	G	C	A	G	A	T	T	A	C	A	A	A	T	A	A	G	C	C	X	G	0	1	P	M
SEN_RT_087.2012	2012	T	A	C	T	C	C	A	G	T	C	X	A	C	C	A	C	T	A	C	G	A	T	T	G	0	1	P	M
SEN_RT_101.2012	2012	C	A	C	T	G	C	A	G	A	T	C	G	T	C	C	C	C	T	C	G	C	T	X	G	0	1	P	M
SEN_RT_105.2012	2012	T	A	T	T	G	C	A	G	A	T	X	G	T	A	C	C	C	A	A	A	A	C	T	G	0	1	P	M
SEN_RT_120.2012	2012	C	A	T	T	C	C	A	G	T	C	C	X	C	C	C	A	T	T	A	G	A	T	T	G	0	1	P	M
SEN_RT_128.2012	2012	T	A	C	T	C	C	A	G	A	T	X	A	C	A	C	C	C	T	A	G	A	C	T	G	0	1	P	M
SEN_RT_158.2015	2015	C	A	C	C	C	C	A	G	A	C	T	A	C	C	A	C	C	T	A	G	C	C	X	G	0	1	P	M
SEN_RT_173.2015	2015	T	A	C	T	C	C	G	G	A	C	X	G	C	A	C	C	C	T	A	G	A	C	T	G	0	1	P	M
SEN_RT_176.2014	2014	T	A	C	T	C	C	A	G	A	T	C	G	C	C	C	C	C	A	A	G	C	T	X	G	0	1	P	M
SEN_RT_182.2013	2013	T	A	C	T	G	C	A	A	A	C	X	A	C	C	C	A	C	A	C	G	A	C	T	G	0	1	P	M
SEN_RT_184.2013	2013	T	G	C	T	C	C	G	G	A	T	C	G	C	A	C	A	C	T	C	G	C	X	T	G	0	1	P	M
SEN_RT_204.2014	2014	T	A	C	T	C	C	A	G	A	C	C	G	T	A	C	C	T	X	A	G	A	T	T	G	0	1	P	M
SEN_RT_223.2013	2013	X	A	C	T	G	C	G	G	A	T	C	G	C	A	A	C	C	T	A	G	A	T	T	G	0	1	P	M
SEN_RT_224.2013	2013	T	A	C	T	C	C	A	G	T	C	X	A	T	C	C	A	C	T	A	A	A	T	T	G	0	1	P	M
SEN_RT_227.2013	2013	T	A	T	T	C	G	A	G	T	C	T	G	C	C	C	C	C	A	C	G	A	C	X	G	0	1	P	M
SEN_RT_250.2015	2015	C	A	C	T	C	G	A	A	A	C	T	X	C	C	C	C	C	T	A	G	C	C	T	G	0	1	P	M
SEN_RT_256.2015	2015	C	A	T	T	C	C	A	A	A	C	C	A	C	C	X	C	T	A	A	G	A	T	T	G	0	1	P	M
SEN_RT_258.2015	2015	T	A	C	C	C	G	G	G	A	T	C	G	C	A	A	C	T	T	A	G	C	C	X	G	0	1	P	M
SEN_RT_261.2015	2015	T	A	T	T	C	C	A	A	A	C	C	X	T	A	A	C	T	A	A	G	C	T	T	G	0	1	P	M
SEN_RT_263.2015	2015	T	X	T	C	G	C	G	G	A	C	T	A	C	A	C	C	C	A	C	G	A	C	T	G	0	1	P	M
SEN_RT_271.2015	2015	C	A	X	T	C	G	A	G	T	T	T	A	C	A	A	C	T	A	A	G	A	T	T	G	0	1	P	M
SEN_RT_274.2015	2015	T	A	C	C	G	G	G	G	A	C	T	X	T	A	A	C	C	T	A	G	A	T	T	G	0	1	P	M
SEN_RT_277.2015	2015	C	A	T	T	G	G	A	G	T	T	C	X	C	A	C	C	C	A	A	G	C	C	T	G	0	1	P	M
SEN_RT_280.2015	2015	T	A	C	T	G	G	G	G	A	C	X	G	C	A	C	C	C	A	A	G	A	T	T	G	0	1	P	M
SEN_RT_291.2015	2015	T	A	C	T	G	C	A	G	A	T	T	A	T	A	X	A	C	T	A	G	A	C	T	G	0	1	P	M
SEN_RT_292.2015	2015	T	A	T	T	C	C	A	A	A	T	X	A	C	A	C	C	T	T	C	G	A	T	T	G	0	1	P	M
SEN_RT_296.2015	2015	C	A	C	T	C	C	A	G	T	C	X	A	C	C	A	C	C	A	A	G	C	T	T	G	0	1	P	M
SEN_RT_306.2015	2015	C	A	C	T	C	X	A	G	T	T	T	G	C	C	A	A	T	A	A	G	A	T	T	G	0	1	P	M
SEN_RT_317.2014	2014	T	G	C	T	G	G	A	G	A	T	X	A	C	A	C	C	C	A	A	G	C	T	T	G	0	1	P	M
SEN_RT_319.2014	2014	X	A	C	T	C	G	G	G	A	T	C	A	C	A	A	C	T	A	C	G	C	C	T	G	0	1	P	M
SEN_RT_323.2014	2014	C	A	C	T	C	C	A	G	T	C	X	A	C	C	C	C	C	A	A	G	C	T	T	G	0	1	P	M
SEN_RT_332.2014	2014	T	A	T	T	C	G	G	G	A	T	X	G	T	A	C	A	C	A	A	G	C	T	T	G	0	1	P	M
SEN_RT_333.2014	2014	T	A	T	T	C	C	G	G	T	T	C	A	C	A	C	C	C	T	C	G	A	T	X	G	0	1	P	M
SEN_RT_338.2015	2015	C	A	C	T	G	C	A	G	A	T	X	G	C	A	A	A	C	T	A	G	C	C	T	G	0	1	P	M
SEN_RT_348.2015	2015	C	A	T	C	G	G	A	A	A	C	T	X	C	C	C	A	C	T	A	G	C	C	T	G	0	1	P	M
SEN_RT_351.2015	2015	T	A	T	T	C	C	A	G	T	C	X	G	C	A	C	A	T	A	A	G	C	T	T	G	0	1	P	M
SEN_RT_366.2015	2015	T	A	X	T	C	G	G	G	A	T	C	G	T	C	C	C	T	T	A	G	A	T	T	G	0	1	P	M
SEN_RT_367.2015	2015	T	A	C	T	C	G	A	G	T	C	X	G	T	C	C	A	C	T	A	G	C	T	T	G	0	1	P	M
SEN_RT_377.2012	2012	C	A	T	T	C	C	A	G	T	C	C	X	C	C	C	A	T	T	A	G	A	T	T	G	0	1	P	M
SEN_RT_381.2012	2012	T	A	T	T	C	C	G	G	A	T	X	G	T	A	C	C	C	T	A	A	A	T	T	G	0	1	P	M
SEN_RT_398.2012	2012	T	A	C	T	C	G	G	G	A	C	C	X	T	A	A	C	T	T	A	A	C	T	T	G	0	1	P	M
SEN_RT_414.2013	2013	T	A	C	T	C	G	A	G	A	C	X	A	C	C	C	C	C	T	C	A	C	T	T	G	0	1	P	M
SEN_RT_415.2013	2013	T	A	C	C	G	C	A	G	A	T	C	G	T	A	X	A	T	A	A	G	C	C	T	G	0	1	P	M
SEN_RT_420.2013	2013	T	A	C	T	C	C	A	G	T	C	X	G	T	C	C	C	T	T	A	G	A	T	T	G	0	1	P	M
SEN_RT_427.2013	2013	X	A	C	T	C	G	A	G	T	C	T	A	C	A	A	C	C	A	C	A	A	T	T	G	0	1	P	M
SEN_RT_430.2013	2013	T	A	C	T	C	C	A	G	T	C	X	A	C	C	A	C	C	A	A	G	A	T	T	G	0	1	P	M
SEN_RT_441.2013	2013	T	A	C	T	C	C	A	G	A	T	T	A	C	C	C	C	C	X	A	G	C	T	T	G	0	1	P	M
SEN_RT_444.2013	2013	T	G	T	C	C	G	A	G	T	T	X	G	C	A	A	C	T	T	A	G	A	T	T	G	0	1	P	M
SEN_RT_449.2013	2013	T	G	T	T	C	X	A	G	T	C	T	A	C	A	C	C	C	T	A	G	A	T	T	G	0	1	P	M
SEN_RT_467.2013	2013	X	A	C	T	G	C	G	G	A	T	C	G	C	A	A	C	C	T	A	G	A	T	T	G	0	1	P	M
SEN_RT_473.2013	2013	T	A	C	T	C	C	A	A	T	T	T	X	C	A	C	C	T	A	C	G	A	C	T	G	0	1	P	M
SEN_RT_475.2013	2013	T	A	T	T	G	G	G	G	A	T	C	X	C	A	A	A	C	A	A	A	A	T	T	G	0	1	P	M
SEN_RT_487.2013	2013	T	A	C	T	C	G	A	A	A	C	X	G	T	C	C	C	T	A	C	G	C	T	T	G	0	1	P	M
SEN_RT_492.2013	2013	C	A	C	C	C	C	G	A	A	T	C	X	C	A	C	C	T	A	A	G	A	C	T	G	0	1	P	M
SEN_RT_493.2013	2013	T	A	C	C	G	C	A	G	A	T	C	X	C	A	A	C	C	T	A	A	C	C	T	G	0	1	P	M
SEN_RT_495.2013	2013	T	A	T	T	C	C	A	G	A	C	X	G	C	A	C	C	T	T	C	G	C	C	T	G	0	1	P	M
SEN_RT_503.2013	2013	T	A	C	T	C	C	G	G	A	C	X	A	T	A	C	C	T	T	A	G	A	C	T	G	0	1	P	M
SEN_RT_513.2013	2013	T	A	C	T	G	C	G	G	T	T	X	A	C	A	C	C	T	A	A	A	C	C	T	G	0	1	P	M
SEN_RT_516.2013	2013	T	A	C	C	G	C	G	G	T	T	X	A	C	A	A	C	T	A	A	A	A	C	T	G	0	1	P	M
SEN_RT_536.2013	2013	T	A	C	T	C	G	G	G	T	T	X	G	C	A	A	A	C	T	A	G	C	T	T	G	0	1	P	M
SEN_RT_547.2013	2013	T	A	C	T	C	C	A	G	A	T	X	A	T	C	A	C	T	T	C	G	C	T	T	G	0	1	P	M
SEN_RT_555.2014	2014	T	A	C	T	C	C	A	G	A	T	C	G	C	C	C	C	C	A	A	G	C	T	X	G	0	1	P	M
SEN_RT_557.2014	2014	C	A	T	T	C	C	A	G	A	C	C	X	T	C	A	A	C	A	A	G	C	T	T	G	0	1	P	M
SEN_RT_559.2014	2014	T	A	C	T	C	C	A	G	T	C	C	X	C	A	C	C	C	A	C	G	A	T	T	G	0	1	P	M
SEN_RT_567.2014	2014	T	A	C	T	G	G	G	G	T	T	T	A	T	A	A	C	T	T	A	G	A	C	X	G	0	1	P	M
SEN_RT_570.2014	2014	C	A	T	T	C	C	A	G	A	C	T	G	C	A	C	C	C	A	C	G	C	T	X	G	0	1	P	M
SEN_RT_573.2014	2014	C	A	C	T	C	C	A	G	T	C	T	G	T	C	C	C	C	X	A	G	C	T	T	G	0	1	P	M
SEN_RT_582.2014	2014	T	A	C	C	G	C	G	A	A	T	T	X	T	A	C	C	C	A	A	G	A	T	T	G	0	1	P	M
SEN_RT_587.2014	2014	T	A	C	T	C	G	G	A	A	C	T	X	C	C	A	C	T	T	A	G	A	C	T	G	0	1	P	M
SEN_RT_590.2014	2014	T	A	T	X	C	C	A	A	T	T	T	A	C	A	C	C	C	T	A	G	A	C	T	G	0	1	P	M
SEN_RT_600.2014	2014	T	A	C	T	C	C	A	G	A	T	X	G	C	C	C	C	C	A	C	A	C	C	T	G	0	1	P	M
SEN_RT_614.2014	2014	C	A	C	T	C	C	G	G	T	C	T	A	T	C	A	A	T	X	C	G	A	C	T	G	0	1	P	M
SEN_RT_621.2014	2014	C	A	T	T	C	C	A	G	T	C	C	X	C	C	C	C	T	A	A	G	A	T	T	G	0	1	P	M
SEN_RT_625.2015	2015	T	A	C	T	C	C	G	G	T	C	T	X	C	A	C	C	C	T	C	G	C	T	T	G	0	1	P	M
SEN_RT_644.2015	2015	T	A	T	T	C	G	G	G	A	C	X	A	C	A	C	C	C	A	A	G	C	T	T	G	0	1	P	M
SEN_RT_647.2015	2015	T	A	C	T	C	G	G	A	A	T	X	G	C	C	C	C	C	A	A	G	A	T	T	G	0	1	P	M
SEN_RT_650.2015	2015	C	A	T	C	C	C	G	G	A	T	T	A	T	A	X	A	T	A	C	G	A	C	T	G	0	1	P	M
SEN_RT_697.2015	2015	T	G	C	T	G	C	A	G	T	C	X	A	C	A	A	A	C	A	A	G	C	T	T	G	0	1	P	M
SEN_RT_699.2015	2015	T	A	C	T	C	G	A	G	T	C	X	A	C	C	C	A	C	T	A	G	C	C	T	G	0	1	P	M
SEN_RT_702.2015	2015	T	A	C	C	C	C	A	G	A	T	T	A	T	A	C	A	T	X	A	G	A	T	T	G	0	1	P	M
SEN_RT_711.2015	2015	T	A	C	T	C	C	A	G	T	C	T	G	C	A	C	C	T	X	A	G	A	C	T	G	0	1	P	M
SEN_RT_714.2015	2015	X	A	T	T	C	C	G	G	T	C	C	A	C	A	A	C	C	A	A	G	A	C	T	G	0	1	P	M
SEN_RT_724.2015	2015	T	A	C	T	C	C	G	G	A	T	X	A	C	A	A	A	T	T	C	G	A	C	T	G	0	1	P	M
SEN_RT_733.2015	2015	T	A	C	C	C	C	A	G	T	C	T	X	C	C	A	C	T	T	A	G	A	C	T	G	0	1	P	M
SEN_RT_735.2015	2015	C	A	C	T	C	C	A	G	A	T	X	G	C	A	C	A	T	A	A	G	A	T	T	G	0	1	P	M
SEN_RT_741.2015	2015	T	A	C	T	C	C	A	G	T	C	X	A	C	C	A	C	T	A	C	G	A	T	T	G	0	1	P	M
SEN_RT_746.2015	2015	T	A	C	T	C	G	A	G	A	C	C	X	T	C	C	C	T	A	A	G	A	C	T	G	0	1	P	M
SEN_RT_747.2015	2015	T	A	C	T	C	G	A	G	A	C	X	G	C	C	A	C	C	T	A	G	A	T	T	G	0	1	P	M
SEN_RT_748.2015	2015	T	A	C	T	G	G	G	G	A	T	X	A	T	C	A	C	C	A	A	G	A	C	T	G	0	1	P	M
SEN_RT_051.2013	2013	C	A	C	T	C	G	A	A	T	C	X	A	C	A	X	A	C	A	C	G	A	C	T	G	0	2	P	M
SEN_RT_117.2012	2012	T	A	C	T	C	C	A	G	A	T	X	X	C	A	A	C	T	A	A	G	A	T	T	G	0	2	P	M
SEN_RT_141.2014	2014	T	A	C	C	C	C	A	G	T	C	T	A	C	C	A	C	C	X	C	A	C	C	X	G	0	2	P	M
SEN_RT_302.2015	2015	T	A	C	C	X	G	A	A	A	C	X	A	C	C	C	C	C	A	C	G	C	T	T	G	0	2	P	M
SEN_RT_361.2015	2015	C	A	C	T	C	X	A	G	T	T	X	G	C	A	A	A	C	T	A	G	A	C	T	G	0	2	P	M
SEN_RT_378.2012	2012	T	A	C	T	G	C	G	G	T	C	X	X	T	C	A	C	C	A	C	G	A	C	T	G	0	2	P	M
SEN_RT_382.2012	2012	T	A	C	C	C	G	A	G	A	C	X	X	T	A	A	A	T	T	A	G	C	T	T	G	0	2	P	M
SEN_RT_390.2012	2012	C	A	C	T	C	G	A	G	A	C	X	X	C	A	C	C	T	A	C	G	C	C	T	G	0	2	P	M
SEN_RT_392.2012	2012	T	A	T	T	C	C	A	G	A	T	X	G	C	A	A	C	T	X	C	G	A	C	T	G	0	2	P	M
SEN_RT_400.2012	2012	C	A	T	T	C	G	A	G	T	C	X	G	T	A	A	A	T	X	A	A	C	T	T	G	0	2	P	M
SEN_RT_454.2013	2013	T	G	T	T	C	C	A	G	A	C	X	X	T	C	C	C	T	A	A	G	A	T	T	G	0	2	P	M
SEN_RT_462.2013	2013	T	A	T	T	C	G	A	G	T	C	T	A	C	A	C	C	T	T	X	X	C	T	T	G	0	2	P	M
SEN_RT_465.2013	2013	C	G	C	C	C	C	G	G	A	C	T	A	T	C	C	C	T	A	X	X	A	T	T	G	0	2	P	M
SEN_RT_535.2013	2013	T	A	C	T	C	G	A	G	A	T	C	G	X	A	C	A	C	X	C	G	C	T	T	G	0	2	P	M
SEN_RT_563.2014	2014	T	A	C	T	C	C	G	G	A	T	C	G	C	A	A	C	T	X	A	A	C	T	X	G	0	2	P	M
SEN_RT_564.2014	2014	T	G	X	T	G	C	G	G	T	C	C	X	C	C	C	C	T	T	A	G	C	T	T	G	0	2	P	M
SEN_RT_576.2014	2014	T	A	C	T	C	G	A	G	T	C	X	X	C	A	A	A	C	T	A	G	C	T	T	G	0	2	P	M
SEN_RT_583.2014	2014	C	A	C	T	X	C	A	G	T	X	C	G	C	A	C	A	C	A	C	G	C	T	T	G	0	2	P	M
SEN_RT_618.2014	2014	T	A	C	C	C	C	G	G	T	C	T	G	C	A	A	A	T	A	A	X	C	C	T	X	0	2	P	M
SEN_RT_666.2015	2015	T	A	C	T	C	C	G	A	T	C	T	X	T	A	C	A	T	A	C	G	A	T	X	G	0	2	P	M
SEN_RT_757.2015	2015	T	A	C	T	C	G	A	G	A	T	X	G	T	A	A	X	T	A	C	A	A	T	T	G	0	2	P	M
SEN_RT_758.2015	2015	T	A	C	T	C	G	A	G	A	T	X	G	T	A	A	X	T	A	C	A	A	T	T	G	0	2	P	M
SEN_RT_199.2015	2015	X	A	C	T	C	C	A	G	T	C	C	G	T	C	C	X	C	X	A	G	A	T	T	G	0	3	P	M
SEN_RT_226.2013	2013	X	A	T	T	C	G	A	G	A	C	X	A	C	A	A	C	C	T	A	G	C	T	X	G	0	3	P	M
SEN_RT_295.2015	2015	T	A	C	T	C	C	A	G	A	C	C	A	X	A	C	C	C	X	C	G	X	T	T	G	0	3	P	M
SEN_RT_304.2015	2015	T	A	C	C	G	C	A	G	T	T	X	G	C	A	A	A	T	A	A	A	X	X	T	G	0	3	P	M
SEN_RT_442.2013	2013	C	G	C	T	G	X	A	G	A	X	X	G	C	A	C	C	T	A	C	G	C	T	T	G	0	3	P	M
SEN_RT_463.2013	2013	T	A	C	C	C	C	G	G	A	C	C	X	T	A	C	C	C	T	X	X	C	C	T	G	0	3	P	M
SEN_RT_464.2013	2013	T	A	C	C	C	C	A	G	A	C	T	X	C	A	C	A	T	T	X	X	C	T	T	G	0	3	P	M
SEN_RT_574.2014	2014	T	A	C	T	C	C	A	A	A	T	X	A	T	A	C	C	T	X	A	A	A	C	X	G	0	3	P	M
SEN_RT_628.2015	2015	C	A	T	T	C	G	A	G	A	C	X	A	T	A	A	C	C	X	A	G	A	C	X	G	0	3	P	M
SEN_RT_636.2015	2015	X	A	T	T	C	C	A	G	T	C	C	X	C	A	C	C	T	X	A	A	A	C	T	G	0	3	P	M
SEN_RT_169.2015	2015	T	A	C	T	G	C	X	A	A	C	X	A	C	C	C	A	C	A	C	G	X	C	X	G	0	4	P	M
SEN_RT_458.2013	2013	T	A	T	T	G	C	A	G	A	T	T	G	C	A	C	X	T	X	X	X	C	T	T	G	0	4	P	M
SEN_RT_507.2013	2013	T	A	T	T	C	G	A	A	A	X	X	A	X	C	C	C	C	X	A	G	A	C	T	G	0	4	P	M
SEN_RT_020.2014	2014	T	A	C	T	G	C	G	G	T	N	T	G	C	A	C	C	C	T	A	A	C	T	T	G	1	0	P	M
SEN_RT_086.2012	2012	T	A	C	T	C	G	G	G	N	T	C	A	C	A	C	A	C	T	A	G	C	C	T	G	1	0	P	M
SEN_RT_102.2012	2012	T	A	T	T	N	C	A	G	T	C	C	A	C	C	A	A	T	T	A	G	C	T	T	G	1	0	P	M
SEN_RT_112.2012	2012	T	A	C	T	C	C	N	A	T	C	T	A	C	C	C	C	C	A	C	G	A	C	T	G	1	0	P	M
SEN_RT_114.2012	2012	T	A	C	T	C	C	G	G	A	C	N	G	C	C	C	C	C	A	A	A	A	T	T	G	1	0	P	M
SEN_RT_142.2013	2013	C	A	C	C	C	G	G	G	A	T	C	A	C	A	C	C	C	A	C	G	N	C	T	G	1	0	P	M
SEN_RT_198.2015	2015	C	A	C	T	G	G	G	G	T	T	N	A	T	C	A	C	T	A	A	G	A	C	T	G	1	0	P	M
SEN_RT_249.2015	2015	C	A	T	T	C	C	A	G	A	C	C	A	T	A	C	C	N	A	A	A	C	C	T	G	1	0	P	M
SEN_RT_255.2015	2015	T	A	T	T	C	C	G	G	A	T	C	G	C	A	C	A	C	A	N	G	C	C	T	G	1	0	P	M
SEN_RT_269.2015	2015	C	A	C	T	C	C	A	G	A	C	T	G	C	A	C	C	C	A	N	G	C	T	T	G	1	0	P	M
SEN_RT_276.2015	2015	T	A	T	T	C	C	A	A	A	T	N	A	C	A	C	C	T	T	C	G	A	T	T	G	1	0	P	M
SEN_RT_300.2015	2015	T	A	N	T	C	C	A	G	A	T	T	A	C	A	C	C	C	A	A	G	A	T	T	G	1	0	P	M
SEN_RT_394.2012	2012	T	A	T	T	C	C	G	N	A	T	T	A	C	A	A	C	T	A	A	G	A	C	T	G	1	0	P	M
SEN_RT_403.2012	2012	T	A	T	T	C	C	G	N	A	T	T	A	C	A	A	C	T	A	A	G	A	C	T	G	1	0	P	M
SEN_RT_419.2013	2013	T	A	C	T	C	C	G	A	T	C	N	A	C	C	C	C	C	A	C	G	A	C	T	G	1	0	P	M
SEN_RT_496.2013	2013	T	A	C	T	C	C	A	A	A	C	T	A	C	A	N	C	C	A	A	G	A	C	T	G	1	0	P	M
SEN_RT_521.2013	2013	T	A	C	C	C	G	G	G	A	C	C	G	C	A	C	A	N	T	A	G	A	C	T	G	1	0	P	M
SEN_RT_538.2013	2013	T	A	C	T	C	C	A	G	A	T	C	A	T	C	N	C	C	A	A	G	A	T	T	G	1	0	P	M
SEN_RT_601.2014	2014	T	A	T	T	C	G	A	G	T	C	T	A	C	C	A	C	C	N	C	G	A	C	T	G	1	0	P	M
SEN_RT_645.2015	2015	T	A	T	T	N	C	A	G	T	T	T	G	C	A	A	A	C	T	A	A	A	T	T	G	1	0	P	M
SEN_RT_664.2015	2015	C	A	C	T	C	C	A	G	A	C	T	G	C	A	C	N	C	A	C	G	C	T	T	G	1	0	P	M
SEN_RT_671.2015	2015	T	A	T	T	C	C	G	G	T	C	T	A	C	A	C	C	C	T	N	A	C	C	T	G	1	0	P	M
SEN_RT_673.2015	2015	C	A	C	C	C	N	G	G	A	T	C	A	T	A	A	C	T	T	A	G	C	C	T	G	1	0	P	M
SEN_RT_740.2015	2015	T	A	C	T	C	C	N	G	A	T	C	G	C	A	C	C	T	T	A	G	A	T	T	G	1	0	P	M
SEN_RT_118.2012	2012	T	A	T	T	C	C	G	N	A	T	X	A	C	A	A	C	T	A	A	G	A	C	T	G	1	1	P	M
SEN_RT_122.2012	2012	C	A	C	T	C	C	X	G	T	T	T	A	N	A	C	C	T	T	A	G	C	T	T	G	1	1	P	M
SEN_RT_174.2014	2014	T	A	C	T	C	C	A	G	N	T	C	G	C	C	C	C	C	A	A	G	C	T	X	G	1	1	P	M
SEN_RT_177.2014	2014	T	A	C	T	C	C	A	G	A	N	C	G	C	C	C	C	C	A	A	G	C	T	X	G	1	1	P	M
SEN_RT_267.2015	2015	T	A	C	T	N	C	A	A	A	C	C	A	C	A	X	C	C	T	A	G	C	T	T	G	1	1	P	M
SEN_RT_374.2012	2012	T	A	T	T	C	C	G	N	A	T	X	A	C	A	A	C	T	A	A	G	A	C	T	G	1	1	P	M
SEN_RT_375.2012	2012	T	A	T	T	C	C	A	G	A	C	T	G	C	A	N	C	C	X	C	G	A	T	T	G	1	1	P	M
SEN_RT_447.2013	2013	T	G	C	C	C	C	G	G	T	C	X	G	C	A	A	A	T	A	A	G	C	N	T	G	1	1	P	M
SEN_RT_545.2013	2013	T	A	C	T	C	C	A	G	N	C	C	G	T	A	C	C	T	X	A	G	A	T	T	G	1	1	P	M
SEN_RT_681.2015	2015	T	A	N	T	C	C	G	A	T	C	X	A	C	C	A	C	C	T	A	G	A	C	T	G	1	1	P	M
SEN_RT_022.2014	2014	T	A	C	T	N	C	A	G	T	X	T	G	T	C	C	C	C	A	A	G	C	T	X	G	1	2	P	M
SEN_RT_076.2013	2013	X	A	T	C	N	C	A	G	A	T	C	G	C	A	C	C	C	X	C	G	A	C	T	G	1	2	P	M
SEN_RT_230.2013	2013	T	X	C	T	N	C	A	G	T	T	T	A	C	C	C	X	C	T	A	G	A	T	T	G	1	2	P	M
SEN_RT_344.2014	2014	T	A	T	T	C	C	G	A	T	C	X	X	T	N	C	C	T	T	A	G	A	C	T	G	1	2	P	M
SEN_RT_429.2013	2013	X	G	C	T	C	C	G	G	A	T	X	A	T	A	C	C	T	N	C	A	C	C	T	G	1	2	P	M
SEN_RT_575.2014	2014	T	A	C	T	C	G	G	A	A	N	T	X	C	A	C	C	T	A	A	G	C	C	X	G	1	2	P	M
SEN_RT_659.2015	2015	X	A	C	T	N	C	A	G	A	T	X	A	C	A	A	A	C	A	A	G	A	C	T	G	1	2	P	M
SEN_RT_027.2014	2014	T	A	C	T	C	C	N	G	A	C	C	G	C	A	C	X	T	X	C	G	A	C	X	G	1	3	P	M
SEN_RT_217.2013	2013	X	A	C	T	C	C	G	G	A	C	T	X	C	A	C	C	C	N	A	A	A	T	X	G	1	3	P	M
SEN_RT_111.2012	2012	X	A	N	T	C	C	A	G	T	C	C	X	T	A	A	C	C	X	A	G	C	T	X	G	1	4	P	M
SEN_RT_232.2013	2013	T	X	X	T	C	G	N	G	A	T	C	G	C	C	A	C	T	X	A	G	A	C	X	G	1	4	P	M
SEN_RT_049.2013	2013	N	A	N	T	C	C	G	G	T	T	T	A	T	A	C	C	C	T	A	G	C	T	T	G	2	0	P	P
SEN_RT_057.2013	2013	N	A	C	T	C	G	A	G	T	T	C	G	T	A	C	C	N	A	A	G	C	C	T	G	2	0	P	P
SEN_RT_062.2013	2013	T	A	T	C	C	C	G	G	N	T	N	A	T	A	C	C	T	T	A	A	A	T	T	G	2	0	P	P
SEN_RT_103.2012	2012	C	A	C	T	C	C	N	G	A	T	T	G	N	A	C	C	T	T	A	A	C	T	T	G	2	0	P	P
SEN_RT_109.2012	2012	C	A	C	C	G	C	N	G	T	C	N	A	C	C	A	C	T	T	A	G	C	T	T	G	2	0	P	P
SEN_RT_139.2013	2013	N	A	N	T	C	C	A	A	A	T	T	A	T	A	A	C	C	A	A	G	A	T	T	G	2	0	P	P
SEN_RT_166.2015	2015	C	A	N	T	C	G	A	G	T	T	T	G	C	A	C	C	N	T	A	G	A	T	T	G	2	0	P	P
SEN_RT_196.2015	2015	T	A	N	T	G	C	A	G	N	T	C	G	C	A	C	A	T	A	A	G	C	T	T	G	2	0	P	P
SEN_RT_240.2015	2015	T	A	T	T	N	C	A	G	N	T	T	G	C	A	C	A	T	A	A	G	C	T	T	G	2	0	P	P
SEN_RT_270.2015	2015	T	A	T	T	C	C	N	G	A	T	T	G	C	A	A	C	N	A	A	G	C	T	T	G	2	0	P	P
SEN_RT_308.2015	2015	T	A	C	N	C	C	G	G	T	C	C	G	T	A	C	C	T	T	A	G	N	T	T	G	2	0	P	P
SEN_RT_313.2015	2015	C	A	C	T	C	C	A	G	A	C	T	G	C	A	C	N	C	A	N	G	C	T	T	G	2	0	P	P
SEN_RT_347.2015	2015	T	A	C	T	C	C	G	G	N	T	N	G	C	C	C	A	C	T	A	G	A	C	T	G	2	0	P	P
SEN_RT_371.2012	2012	T	A	C	C	C	C	G	G	A	N	T	A	C	A	C	A	N	T	A	G	C	T	T	G	2	0	P	P
SEN_RT_396.2012	2012	T	A	T	T	G	G	G	G	A	N	T	A	N	A	A	C	T	A	A	G	C	T	T	G	2	0	P	P
SEN_RT_529.2013	2013	T	A	C	T	C	C	A	G	T	C	T	G	T	C	N	A	T	N	C	G	C	C	T	G	2	0	P	P
SEN_RT_534.2013	2013	N	A	C	T	C	G	G	G	T	C	T	A	C	A	C	C	C	A	N	G	A	C	T	G	2	0	P	P
SEN_RT_597.2014	2014	T	A	C	T	C	C	G	G	A	C	C	G	C	N	C	A	C	A	N	G	A	T	T	G	2	0	P	P
SEN_RT_613.2014	2014	C	A	C	T	C	C	G	G	T	N	T	A	T	C	A	A	T	T	C	G	N	C	T	G	2	0	P	P
SEN_RT_749.2015	2015	T	A	C	T	G	C	N	G	A	N	T	G	T	A	C	C	C	T	C	G	A	C	T	G	2	0	P	P
SEN_RT_752.2015	2015	T	A	C	T	C	C	A	G	A	T	T	G	T	C	A	A	C	A	A	N	N	T	T	G	2	0	P	P
SEN_RT_005.2014	2014	C	A	C	T	N	G	G	A	A	C	X	G	C	A	C	A	C	T	A	G	N	T	T	G	2	1	P	P
SEN_RT_107.2012	2012	N	A	C	T	C	G	A	A	N	C	T	X	C	C	C	A	T	A	A	G	C	T	T	G	2	1	P	P
SEN_RT_379.2012	2012	C	A	C	N	C	G	A	G	T	T	C	G	C	A	C	C	T	X	C	A	C	N	T	G	2	1	P	P
SEN_RT_384.2012	2012	T	A	C	T	C	N	A	G	A	C	C	A	C	A	C	C	C	X	N	G	A	T	T	G	2	1	P	P
SEN_RT_397.2012	2012	T	A	C	T	C	C	G	G	T	C	N	A	T	A	A	A	T	X	N	G	C	C	T	G	2	1	P	P
SEN_RT_428.2013	2013	X	A	C	T	G	C	A	G	A	T	C	N	T	A	C	C	T	N	A	G	C	T	T	G	2	1	P	P
SEN_RT_131.2013	2013	T	A	C	T	C	C	A	G	N	C	T	X	T	A	C	A	C	T	A	A	A	N	X	G	2	2	P	P
SEN_RT_399.2012	2012	N	A	C	C	C	C	G	A	A	C	T	G	X	A	A	C	T	X	A	G	C	N	T	G	2	2	P	P
SEN_RT_460.2013	2013	C	A	C	T	C	G	A	G	N	C	T	A	T	C	C	N	C	T	X	X	A	T	T	G	2	2	P	P
SEN_RT_729.2015	2015	T	A	C	T	C	C	N	G	T	T	X	G	C	N	C	C	T	T	A	G	A	T	T	X	2	2	P	P
SEN_RT_088.2012	2012	T	A	C	T	C	C	A	G	T	T	T	N	X	A	N	C	X	X	A	A	X	T	T	G	2	4	P	P
SEN_RT_480.2013	2013	T	A	C	T	C	N	N	G	A	C	X	G	C	C	A	C	C	X	A	G	X	T	X	G	2	4	P	P
SEN_RT_047.2013	2013	T	A	C	T	N	C	A	G	A	N	C	G	C	A	C	N	T	A	A	G	C	C	T	G	3	0	P	P
SEN_RT_053.2013	2013	C	A	T	T	C	G	A	G	A	N	C	G	N	A	C	A	T	A	A	N	C	T	T	G	3	0	P	P
SEN_RT_075.2013	2013	C	A	C	T	C	C	A	G	A	T	C	G	C	A	C	N	C	A	A	G	N	N	T	G	3	0	P	P
SEN_RT_083.2012	2012	C	A	T	T	N	G	A	G	N	N	C	G	T	A	C	C	C	A	A	G	A	T	T	G	3	0	P	P
SEN_RT_115.2012	2012	N	A	C	T	G	C	A	G	N	T	C	A	C	A	C	C	N	T	C	G	A	T	T	G	3	0	P	P
SEN_RT_129.2012	2012	T	A	C	T	N	C	N	G	T	C	T	A	N	C	C	C	T	A	A	G	C	C	T	G	3	0	P	P
SEN_RT_153.2013	2013	C	A	C	C	N	C	N	G	A	T	C	A	T	A	A	A	C	T	A	G	N	C	T	G	3	0	P	P
SEN_RT_160.2013	2013	T	A	C	T	C	N	A	G	N	C	T	A	T	N	C	A	C	T	A	A	A	T	T	G	3	0	P	P
SEN_RT_165.2015	2015	T	A	C	T	N	C	N	G	T	C	T	A	C	A	N	A	C	A	A	A	A	C	T	G	3	0	P	P
SEN_RT_171.2015	2015	T	A	C	T	C	G	A	N	N	T	C	G	C	A	A	C	C	A	A	G	A	N	T	G	3	0	P	P
SEN_RT_266.2015	2015	T	A	C	N	C	C	G	G	N	T	T	A	C	A	N	C	C	A	C	A	A	T	T	G	3	0	P	P
SEN_RT_452.2013	2013	T	G	C	C	C	N	G	G	T	C	C	A	C	C	N	C	T	A	A	G	A	N	T	G	3	0	P	P
SEN_RT_003.2014	2014	T	A	N	T	C	G	A	G	A	C	T	G	C	A	C	C	C	N	A	G	A	N	X	G	3	1	P	P
SEN_RT_018.2014	2014	T	A	C	T	G	C	N	G	N	T	C	G	C	A	C	C	C	A	A	N	C	T	X	G	3	1	P	P
SEN_RT_089.2012	2012	C	X	C	T	G	C	A	G	N	C	C	G	C	A	N	A	C	A	A	G	N	T	T	G	3	1	P	P
SEN_RT_446.2013	2013	T	G	N	T	C	N	G	G	A	C	T	G	C	A	C	C	X	N	A	G	A	C	T	G	3	1	P	P
SEN_RT_624.2015	2015	X	A	C	T	C	C	G	G	N	T	N	G	T	A	A	C	C	A	A	N	A	C	T	G	3	1	P	P
SEN_RT_710.2015	2015	C	A	N	T	C	C	A	G	T	C	X	A	C	N	C	C	C	A	A	G	N	C	T	G	3	1	P	P
SEN_RT_743.2015	2015	N	A	C	T	C	N	A	G	N	T	T	A	T	A	A	C	T	A	A	A	C	C	X	G	3	1	P	P
SEN_RT_013.2014	2014	C	A	C	T	C	N	G	A	T	T	T	X	T	C	N	C	T	A	N	G	C	C	X	G	3	2	P	P
SEN_RT_210.2013	2013	T	A	T	T	C	C	A	G	T	C	C	N	C	X	C	X	N	A	A	G	A	N	T	G	3	2	P	P
SEN_RT_238.2015	2015	T	A	C	T	C	G	N	G	A	T	C	G	C	C	A	X	N	A	A	G	A	N	X	G	3	2	P	P
SEN_RT_058.2013	2013	N	A	T	T	C	C	N	G	T	N	C	G	C	C	C	C	T	T	A	G	N	T	T	G	4	0	P	P
SEN_RT_059.2013	2013	T	A	N	T	G	C	N	G	A	T	T	G	T	C	N	A	T	A	A	G	N	C	T	G	4	0	P	P
SEN_RT_104.2012	2012	T	A	C	T	G	N	A	N	A	N	T	A	T	A	C	A	C	A	N	G	C	T	T	G	4	0	P	P
SEN_RT_135.2014	2014	C	A	N	T	C	G	A	G	N	N	C	G	C	A	C	A	C	T	A	G	C	N	T	G	4	0	P	P
SEN_RT_187.2013	2013	T	A	C	T	N	G	A	G	A	N	C	G	N	A	A	C	C	A	A	G	N	C	T	G	4	0	P	P
SEN_RT_193.2013	2013	T	A	C	T	C	C	A	G	N	N	T	G	C	C	A	C	T	A	C	N	N	T	T	G	4	0	P	P
SEN_RT_200.2014	2014	C	A	T	T	C	G	G	G	T	N	C	N	C	A	A	A	C	A	N	G	C	N	T	G	4	0	P	P
SEN_RT_252.2015	2015	T	A	T	T	N	C	N	A	T	N	C	A	C	C	N	C	C	A	A	G	A	T	T	G	4	0	P	P
SEN_RT_286.2015	2015	N	A	C	C	C	C	G	G	T	N	T	A	C	A	C	C	T	N	A	G	N	C	T	G	4	0	P	P
SEN_RT_328.2014	2014	T	A	C	T	N	G	A	G	N	C	T	G	C	A	N	C	C	A	A	A	C	N	T	G	4	0	P	P
SEN_RT_337.2015	2015	C	A	C	C	N	G	A	N	A	N	T	A	T	C	C	C	C	A	A	G	A	N	T	G	4	0	P	P
SEN_RT_363.2015	2015	T	A	C	T	C	C	A	G	N	N	N	N	T	A	C	C	C	T	A	G	A	T	T	G	4	0	P	P
SEN_RT_687.2015	2015	N	N	C	C	N	C	A	G	T	C	C	A	C	C	C	N	C	T	A	G	A	C	T	G	4	0	P	P
SEN_RT_688.2015	2015	C	N	C	C	G	N	A	G	T	C	C	A	C	N	C	N	C	T	A	G	A	C	T	G	4	0	P	P
SEN_RT_095.2012	2012	T	A	T	N	C	G	A	G	T	T	C	G	T	A	A	N	N	A	A	G	A	C	X	N	4	1	P	P
SEN_RT_239.2015	2015	C	A	N	T	G	G	G	G	T	C	T	N	T	A	N	C	N	T	A	G	C	T	X	G	4	1	P	P
SEN_RT_257.2015	2015	C	A	T	T	N	C	A	G	T	T	N	G	T	A	C	A	C	A	A	N	C	N	T	X	4	1	P	P
SEN_RT_287.2015	2015	C	A	C	T	C	C	A	G	N	N	T	A	C	A	N	C	N	A	A	G	C	C	T	X	4	1	P	P
SEN_RT_326.2014	2014	T	A	C	T	G	C	N	N	A	T	X	N	T	A	C	A	C	A	A	G	A	N	T	G	4	1	P	P
SEN_RT_305.2015	2015	T	A	C	N	C	C	A	N	A	T	T	A	N	A	C	N	C	T	A	G	X	X	T	G	4	2	P	P
SEN_RT_459.2013	2013	T	A	C	T	C	C	A	N	A	T	N	A	T	N	N	C	C	A	X	X	C	C	T	G	4	2	P	P
SEN_RT_151.2014	2014	N	A	C	T	C	N	G	G	T	T	N	X	N	A	C	C	C	X	A	G	C	T	X	G	4	3	P	P
SEN_RT_299.2015	2015	C	X	N	T	C	G	G	X	N	T	T	G	N	A	C	C	C	X	A	G	N	T	X	G	4	4	P	P
SEN_RT_303.2015	2015	T	A	C	T	C	C	N	N	A	T	X	X	C	N	C	C	T	X	A	A	N	C	X	G	4	4	P	P
SEN_RT_422.2013	2013	T	A	C	N	C	N	A	G	N	T	T	A	X	A	N	C	C	X	A	G	X	T	X	G	4	4	P	P
SEN_RT_426.2013	2013	X	X	C	T	C	N	N	X	N	C	T	N	C	A	C	C	T	A	A	G	C	T	X	G	4	4	P	P
SEN_RT_004.2014	2014	C	A	N	T	C	N	A	G	N	T	T	G	C	N	C	C	C	A	A	A	N	T	T	G	5	0	P	P
SEN_RT_034.2015	2015	T	A	T	T	C	N	N	G	A	T	C	G	T	A	N	C	N	A	A	G	C	N	T	G	5	0	P	P
SEN_RT_099.2012	2012	C	A	C	T	N	C	A	G	T	N	N	A	N	A	A	N	T	T	A	G	A	T	T	G	5	0	P	P
SEN_RT_178.2013	2013	T	A	C	T	N	C	A	G	T	C	T	G	C	C	C	C	N	T	N	G	N	N	T	G	5	0	P	P
SEN_RT_243.2015	2015	T	A	C	C	C	N	N	G	T	T	T	A	C	C	C	C	N	N	A	G	C	N	T	G	5	0	P	P
SEN_RT_569.2014	2014	T	A	C	T	C	C	N	N	A	C	C	G	T	A	N	C	C	T	C	N	A	N	T	G	5	0	P	P
SEN_RT_672.2015	2015	N	A	C	T	N	G	A	G	N	T	N	G	T	A	C	A	C	A	A	G	C	N	T	G	5	0	P	P
SEN_RT_754.2015	2015	C	A	C	T	N	C	G	G	N	C	T	G	C	C	C	C	N	A	N	G	C	N	T	G	5	0	P	P
SEN_RT_031.2015	2015	X	A	C	C	C	G	A	G	N	N	C	N	C	A	C	A	C	N	N	A	A	T	T	G	5	1	P	P
SEN_RT_281.2015	2015	N	A	C	T	N	G	G	G	N	C	N	G	C	A	C	C	C	A	A	G	A	N	X	G	5	1	P	P
SEN_RT_439.2013	2013	C	A	C	T	C	N	A	A	T	T	T	A	T	A	N	N	T	A	N	A	N	C	X	G	5	1	P	P
SEN_RT_598.2014	2014	T	A	T	T	N	C	N	G	N	T	C	A	T	A	C	N	T	T	A	G	A	N	X	G	5	1	P	P
SEN_RT_717.2015	2015	N	A	C	C	C	C	A	G	N	T	C	A	C	A	C	A	C	N	A	N	C	N	X	G	5	1	P	P
SEN_RT_279.2015	2015	X	A	C	T	C	C	G	G	A	N	T	N	C	A	N	C	C	N	A	G	A	N	X	G	5	2	P	P
SEN_RT_515.2013	2013	X	A	C	T	C	C	G	G	N	C	C	N	C	A	C	N	N	T	A	N	C	C	X	G	5	2	P	P
SEN_RT_457.2013	2013	X	X	N	T	N	C	A	G	A	N	T	G	C	A	C	A	N	A	A	G	N	T	X	G	5	3	P	P
SEN_RT_007.2014	2014	C	A	T	T	G	N	A	N	N	N	N	G	C	N	C	C	C	A	A	G	A	C	T	G	6	0	P	P
SEN_RT_035.2015	2015	T	A	C	T	C	C	N	G	N	N	T	G	C	N	C	C	N	A	N	A	C	C	T	G	6	0	P	P
SEN_RT_042.2015	2015	N	A	C	N	C	G	N	G	T	N	T	A	C	N	A	N	C	A	A	G	C	C	T	G	6	0	P	P
SEN_RT_069.2013	2013	T	A	C	T	N	C	N	G	A	C	T	G	N	A	A	N	T	N	C	N	A	C	T	G	6	0	P	P
SEN_RT_133.2013	2013	T	A	N	T	N	C	A	G	N	N	C	G	C	A	N	C	T	A	N	G	C	C	T	G	6	0	P	P
SEN_RT_179.2014	2014	C	A	C	C	C	N	A	G	N	N	C	N	C	C	C	C	N	N	A	G	C	T	T	G	6	0	P	P
SEN_RT_195.2015	2015	N	A	N	T	N	C	A	G	N	T	N	G	C	A	C	A	N	A	A	G	C	T	T	G	6	0	P	P
SEN_RT_331.2015	2015	T	A	C	T	C	C	A	N	A	N	C	N	N	A	C	A	T	A	N	G	A	N	T	G	6	0	P	P
SEN_RT_668.2015	2015	T	N	C	T	N	G	N	G	N	T	T	G	C	A	A	C	T	A	A	G	N	N	T	G	6	0	P	P
SEN_RT_040.2015	2015	X	A	C	T	C	N	A	G	N	T	N	A	C	A	A	C	N	A	A	N	N	C	T	G	6	1	P	P
SEN_RT_194.2014	2014	N	A	N	T	N	C	A	G	N	T	N	G	C	A	C	A	N	A	A	G	C	T	X	G	6	1	P	P
SEN_RT_282.2015	2015	N	A	C	T	C	G	N	G	N	C	T	N	C	A	N	C	T	N	A	G	A	C	X	G	6	1	P	P
SEN_RT_368.2015	2015	T	A	C	T	C	C	N	G	A	N	C	G	C	N	C	C	N	T	C	N	C	N	X	G	6	1	P	P
SEN_RT_494.2013	2013	T	A	C	T	C	G	N	G	T	C	C	N	C	N	N	C	C	A	A	N	C	N	X	G	6	1	P	P
SEN_RT_556.2014	2014	C	A	C	T	C	N	N	G	T	N	T	A	N	A	N	C	C	A	A	G	C	N	X	G	6	1	P	P
SEN_RT_655.2015	2015	N	A	C	T	C	G	A	G	A	N	T	A	C	A	C	C	N	N	C	A	N	N	X	G	6	1	P	P
SEN_RT_517.2013	2013	X	G	C	T	N	C	N	G	N	T	T	A	T	A	N	C	N	A	A	G	N	C	X	G	6	2	P	P
SEN_RT_048.2013	2013	T	A	C	T	N	C	A	G	N	N	T	G	N	A	C	C	N	T	A	G	N	N	T	G	7	0	P	P
SEN_RT_070.2013	2013	N	A	C	T	C	C	A	N	T	T	T	A	T	N	N	N	T	A	N	A	N	C	T	G	7	0	P	P
SEN_RT_284.2015	2015	N	A	N	T	N	G	G	G	N	N	T	N	C	A	N	A	T	T	A	A	A	T	T	G	7	0	P	P
SEN_RT_301.2015	2015	N	A	C	T	N	N	G	G	A	T	C	A	C	N	C	C	N	N	A	G	N	C	T	G	7	0	P	P
SEN_RT_453.2013	2013	T	G	C	N	N	G	G	G	N	T	T	A	N	N	C	A	C	N	A	G	N	C	T	G	7	0	P	P
SEN_RT_522.2013	2013	C	A	C	T	C	G	A	N	N	C	N	G	C	N	N	C	C	N	A	G	C	N	T	G	7	0	P	P
SEN_RT_586.2014	2014	T	A	N	T	N	C	N	G	N	T	C	A	T	A	C	C	T	N	A	G	N	N	T	G	7	0	P	P
SEN_RT_106.2012	2012	T	A	N	T	G	N	N	G	A	N	C	G	T	A	N	C	N	T	A	G	N	T	X	G	7	1	P	P
SEN_RT_116.2012	2012	X	N	C	C	C	N	A	N	A	N	N	A	C	N	C	C	C	A	A	N	C	T	T	G	7	1	P	P
SEN_RT_667.2015	2015	C	A	C	T	C	C	N	G	N	N	C	G	C	A	N	N	N	A	C	G	N	T	X	G	7	1	P	P
SEN_RT_228.2013	2013	N	A	C	T	C	C	N	A	N	N	N	X	C	A	C	C	N	A	N	G	A	T	X	G	7	2	P	P
SEN_RT_288.2015	2015	N	A	N	T	C	C	A	G	T	N	N	N	N	C	C	C	C	T	A	G	C	N	X	X	7	2	P	P
SEN_RT_050.2013	2013	N	A	C	T	C	G	A	G	N	N	T	N	N	N	C	A	N	A	A	G	N	C	T	G	8	0	P	P
SEN_RT_155.2015	2015	N	A	T	T	C	N	N	G	A	T	N	N	T	A	N	C	N	A	A	G	C	N	T	G	8	0	P	P
SEN_RT_244.2015	2015	N	A	C	C	C	G	N	G	N	N	N	A	C	N	A	C	C	N	A	G	C	N	T	G	8	0	P	P
SEN_RT_265.2015	2015	C	A	C	T	C	N	N	G	N	N	C	A	N	N	C	C	C	A	A	G	N	N	T	G	8	0	P	P
SEN_RT_579.2014	2014	N	N	C	N	G	N	G	G	N	N	T	N	C	A	C	N	T	T	C	G	A	C	T	G	8	0	P	P
SEN_RT_581.2014	2014	N	N	N	N	C	C	G	N	T	N	N	A	C	A	C	C	C	A	C	G	C	N	T	G	8	0	P	P
SEN_RT_669.2015	2015	C	A	C	T	N	N	G	G	N	N	T	N	N	N	C	C	C	A	A	G	N	T	T	G	8	0	P	P
SEN_RT_148.2013	2013	T	A	C	N	C	N	G	N	A	N	T	N	N	N	C	C	C	T	N	G	C	T	X	G	8	1	P	P
SEN_RT_360.2015	2015	T	A	N	T	N	C	N	G	N	C	T	N	N	N	C	N	T	T	X	G	A	C	T	G	8	1	P	P
SEN_RT_651.2015	2015	C	A	C	T	N	C	G	N	T	N	T	A	N	C	C	A	C	N	N	A	N	N	X	G	8	1	P	P
SEN_RT_682.2015	2015	X	A	C	T	N	N	A	G	N	T	N	N	N	N	C	C	C	A	A	G	C	N	T	G	8	1	P	P
SEN_RT_229.2013	2013	N	X	C	T	C	C	A	G	N	N	N	N	N	N	C	C	N	A	A	G	A	T	X	G	8	2	P	P
SEN_RT_345.2014	2014	T	A	N	T	C	G	A	G	N	N	C	N	N	N	C	C	C	A	C	G	N	N	X	X	8	2	P	P
SEN_RT_497.2013	2013	T	A	C	N	C	G	N	N	N	N	T	A	C	C	C	C	X	X	A	N	N	N	T	G	8	2	P	P
SEN_RT_124.2012	2012	C	A	N	T	C	N	N	G	N	N	C	G	N	A	C	C	N	A	C	G	N	N	T	G	9	0	P	P
SEN_RT_189.2013	2013	T	A	C	T	N	G	A	G	N	T	N	A	N	A	A	N	N	N	A	G	N	N	T	G	9	0	P	P
SEN_RT_253.2015	2015	C	A	C	N	C	N	N	G	N	N	C	N	N	N	N	C	C	A	A	G	A	T	T	G	9	0	P	P
SEN_RT_508.2013	2013	N	A	C	T	G	N	A	N	A	N	T	G	N	N	C	C	N	N	A	G	A	N	T	G	9	0	P	P
SEN_RT_653.2015	2015	T	N	C	N	N	G	N	G	A	N	C	G	N	N	C	A	N	A	A	G	A	N	T	G	9	0	P	P
SEN_RT_708.2015	2015	C	N	C	T	C	G	N	N	T	N	N	N	C	A	C	C	C	A	A	N	N	N	T	G	9	0	P	P
SEN_RT_726.2015	2015	C	A	C	T	G	G	N	N	A	N	N	N	N	A	N	C	N	T	A	N	A	T	T	G	9	0	P	P
SEN_RT_734.2015	2015	N	A	C	N	C	C	A	N	N	N	N	A	C	A	C	C	T	N	N	G	A	N	T	G	9	0	P	P
SEN_RT_108.2012	2012	X	A	T	T	C	C	N	G	N	N	C	G	N	N	N	C	N	N	A	G	A	N	T	G	9	1	P	P
SEN_RT_216.2013	2013	N	A	C	N	N	C	N	A	A	C	N	G	N	A	C	C	N	A	C	N	A	N	X	G	9	1	P	P
SEN_RT_469.2013	2013	N	A	C	T	C	N	A	N	T	T	T	A	T	A	N	N	T	A	N	N	N	N	X	G	9	1	P	P
SEN_RT_716.2015	2015	T	A	N	N	N	G	N	G	N	N	T	A	C	A	C	A	N	A	A	G	N	N	X	G	9	1	P	P
SEN_RT_461.2013	2013	T	A	C	N	C	N	A	N	N	T	T	G	N	N	C	N	N	A	X	X	A	N	T	G	9	2	P	P
SEN_RT_054.2013	2013	T	A	N	T	N	G	N	G	A	N	C	N	N	A	C	N	N	T	A	N	N	T	T	G	10	0	P	P
SEN_RT_197.2015	2015	N	A	C	T	C	G	N	G	T	N	N	N	N	A	N	C	N	A	N	G	C	N	T	G	10	0	P	P
SEN_RT_633.2015	2015	N	A	C	T	C	N	N	G	N	T	T	A	N	A	N	C	N	A	N	G	N	N	T	G	10	0	P	P
SEN_RT_041.2015	2015	X	A	N	T	N	N	A	G	A	N	N	G	N	N	N	C	C	A	A	G	N	N	T	G	10	1	P	P
SEN_RT_395.2012	2012	T	A	N	N	N	N	N	G	A	N	N	G	N	A	N	C	C	A	A	G	A	N	X	G	10	1	P	P
SEN_RT_423.2013	2013	T	A	C	T	C	N	A	G	N	T	C	N	N	N	N	C	N	T	C	N	N	N	X	G	10	1	P	P
SEN_RT_652.2015	2015	X	A	C	T	C	N	N	G	T	N	T	N	N	N	C	N	C	A	A	N	N	N	T	G	10	1	P	P
SEN_RT_033.2015	2015	N	A	N	N	C	N	A	G	A	T	N	N	N	N	N	C	C	X	A	N	C	C	X	G	10	2	P	P
SEN_RT_028.2015	2015	C	A	N	N	N	N	A	G	A	N	N	A	N	A	N	C	N	T	N	G	C	N	T	G	11	0	P	P
SEN_RT_092.2012	2012	T	A	N	N	C	C	N	N	N	T	C	N	N	A	A	N	N	A	A	G	N	N	X	G	11	1	P	P
SEN_RT_654.2015	2015	N	A	C	N	N	G	A	G	A	N	C	N	N	N	N	N	N	A	A	G	A	N	X	G	11	1	P	P
SEN_RT_036.2015	2015	T	A	N	T	C	G	A	N	N	N	C	G	C	N	N	C	N	N	N	G	N	N	X	X	11	2	P	P
SEN_RT_285.2015	2015	X	A	N	N	N	C	N	G	N	N	T	N	C	A	C	N	N	A	A	N	A	N	X	G	11	2	P	P
SEN_RT_183.2013	2013	X	A	C	T	N	C	N	G	N	N	N	X	N	N	N	N	C	A	A	G	N	N	X	G	11	3	P	P
SEN_RT_037.2015	2015	N	A	N	T	N	N	N	G	N	T	N	G	N	A	C	C	N	N	A	G	N	N	T	G	12	0	P	P
SEN_RT_310.2015	2015	N	A	N	N	C	N	N	G	N	T	N	A	N	A	N	C	N	N	A	G	C	N	T	G	12	0	P	P
SEN_RT_632.2015	2015	T	A	N	T	C	C	N	G	N	N	N	N	N	N	N	C	C	N	A	G	N	N	T	G	12	0	P	P
SEN_RT_168.2015	2015	N	A	T	N	N	C	N	G	N	N	N	N	T	N	C	N	T	T	C	N	N	T	X	G	12	1	P	P
SEN_RT_357.2015	2015	T	A	N	T	N	C	N	G	N	N	N	G	N	A	N	C	N	N	A	G	N	N	X	G	12	1	P	P
SEN_RT_619.2014	2014	C	A	N	T	C	C	N	G	N	C	N	N	N	N	N	N	N	A	A	G	N	N	X	G	12	1	P	P
SEN_RT_211.2013	2013	N	A	N	C	C	N	A	G	N	N	N	N	N	A	N	N	C	A	N	G	N	N	X	G	13	1	P	P
SEN_RT_025.2014	2014	N	A	C	T	N	N	A	N	N	N	T	N	T	N	N	N	C	N	A	N	N	N	T	G	14	0	P	P
SEN_RT_275.2015	2015	N	A	N	N	N	C	N	N	N	N	N	N	N	C	C	N	N	A	A	G	A	N	T	G	14	0	P	P
SEN_RT_009.2014	2014	T	A	T	T	X	C	A	G	T	C	X	G	T	A	X	A	N	A	A	G	A	X	X	G	1	5	F
SEN_RT_225.2013	2013	T	A	C	T	C	C	A	G	T	C	X	A	X	C	C	A	C	T	X	A	X	T	X	G	0	5	F
SEN_RT_346.2015	2015	C	X	C	T	G	C	A	A	T	X	C	G	C	A	C	X	T	A	A	G	A	X	X	G	0	5	F
SEN_RT_483.2013	2013	T	A	T	T	C	G	G	G	N	T	X	G	C	C	X	A	C	X	A	A	X	C	X	G	1	5	F
SEN_RT_532.2013	2013	T	A	T	T	C	C	G	G	A	X	X	X	T	A	A	C	T	X	A	G	A	T	X	G	0	5	F
SEN_RT_537.2013	2013	X	A	T	T	X	C	G	G	N	C	C	G	X	A	C	C	T	X	A	G	A	T	X	G	1	5	F
SEN_RT_696.2015	2015	T	A	T	C	X	C	A	G	A	C	C	G	X	A	X	A	C	X	A	G	C	T	X	G	0	5	F
SEN_RT_311.2015	2015	C	G	C	T	C	C	X	G	A	C	T	X	X	A	C	C	C	X	A	X	C	T	X	G	0	6	F
SEN_RT_413.2013	2013	N	X	T	X	G	C	G	G	A	T	C	X	X	A	A	C	C	X	A	A	A	C	X	G	1	6	F
SEN_RT_431.2013	2013	T	A	C	N	C	N	X	N	N	T	X	G	X	X	N	C	N	X	N	G	N	N	X	G	9	6	F
SEN_RT_498.2013	2013	X	A	C	X	C	C	X	G	N	C	T	X	T	A	C	C	T	X	C	A	A	C	X	G	1	6	F
SEN_RT_544.2013	2013	T	A	C	T	G	C	X	A	A	C	X	A	X	C	C	A	C	X	C	G	X	C	X	G	0	6	F
SEN_RT_732.2015	2015	C	A	T	T	C	C	G	G	T	X	X	X	X	A	C	C	T	X	A	G	A	T	X	G	0	6	F
SEN_RT_316.2014	2014	C	A	C	T	C	C	G	G	A	X	X	G	C	A	A	A	X	X	X	X	A	T	X	G	0	7	F
SEN_RT_405.2012	2012	T	A	C	X	C	G	X	A	A	C	T	G	X	X	C	X	T	X	A	G	C	T	X	G	0	7	F
SEN_RT_433.2013	2013	N	X	C	C	X	C	X	G	N	C	C	G	X	X	C	C	T	X	A	N	C	C	X	G	3	7	F
SEN_RT_502.2013	2013	T	A	C	X	C	C	A	G	A	C	T	X	X	A	C	X	C	X	A	A	X	T	X	G	0	7	F
SEN_RT_596.2014	2014	T	A	T	T	C	G	G	G	A	X	X	X	T	A	X	X	T	A	N	G	X	T	X	G	1	7	F
SEN_RT_212.2013	2013	C	X	X	X	C	N	A	X	N	X	X	A	T	A	C	N	C	X	C	G	C	T	X	G	3	8	F
SEN_RT_380.2012	2012	C	X	C	T	C	C	X	G	A	T	T	X	X	X	C	X	T	X	A	N	C	T	X	G	1	8	F
SEN_RT_401.2012	2012	X	A	C	T	C	G	X	G	T	T	T	X	X	X	C	X	C	X	C	G	C	T	X	G	0	8	F
SEN_RT_409.2013	2013	T	X	T	C	G	C	X	G	T	C	T	X	X	X	A	X	C	X	A	G	A	T	X	G	0	8	F
SEN_RT_421.2013	2013	C	X	C	X	C	C	A	X	A	T	T	G	X	X	C	X	C	X	A	A	C	T	X	G	0	8	F
SEN_RT_425.2013	2013	C	X	C	T	C	X	X	G	A	X	T	G	X	A	C	X	C	X	N	G	C	T	X	G	1	8	F
SEN_RT_471.2013	2013	C	X	C	T	C	C	X	A	T	T	T	X	T	X	A	X	T	X	X	A	A	C	X	G	0	8	F
SEN_RT_512.2013	2013	X	X	C	T	X	G	G	X	T	X	T	G	T	C	C	C	T	X	A	G	X	T	X	G	0	8	F
SEN_RT_514.2013	2013	T	A	C	T	X	C	A	G	N	X	T	X	X	C	C	X	C	X	A	A	X	T	X	G	1	8	F
SEN_RT_066.2013	2013	X	A	X	T	G	C	X	X	T	T	C	G	T	X	C	A	C	X	X	A	X	T	X	G	0	9	F
SEN_RT_150.2014	2014	T	X	C	T	N	C	G	G	T	X	X	X	C	A	X	X	C	X	A	G	X	N	X	G	2	9	F
SEN_RT_387.2012	2012	T	X	X	C	C	C	X	A	A	C	T	G	X	X	A	X	T	X	A	G	X	T	X	G	0	9	F
SEN_RT_541.2013	2013	X	A	T	X	C	C	X	G	A	X	T	X	X	X	C	A	C	X	A	G	A	C	X	G	0	9	F
SEN_RT_417.2013	2013	C	X	X	X	N	G	X	A	A	T	T	X	X	X	C	X	C	X	A	G	C	C	X	G	1	10	F
SEN_RT_589.2014	2014	X	X	X	T	C	C	X	G	N	T	C	X	X	X	C	X	T	X	A	G	N	T	X	G	2	10	F
SEN_RT_683.2015	2015	T	A	X	X	X	C	X	G	N	T	C	G	X	A	A	X	N	X	X	X	C	C	X	G	2	10	F
SEN_RT_609.2014	2014	X	X	X	T	X	C	X	G	A	X	C	A	T	X	C	X	T	X	A	G	X	N	X	G	1	11	F
SEN_RT_235.2013	2013	C	A	C	X	X	C	G	X	A	X	C	X	X	X	X	X	T	A	X	G	X	C	X	G	0	12	F
SEN_RT_314.2015	2015	C	X	X	T	C	C	X	G	A	C	X	X	X	A	X	C	C	X	X	G	X	X	X	G	0	12	F
SEN_RT_560.2014	2014	X	A	C	X	X	C	X	X	A	C	X	G	X	X	C	X	T	X	A	G	X	T	X	G	0	12	F
SEN_RT_607.2014	2014	T	X	C	T	X	X	A	X	X	T	X	G	X	A	C	C	C	X	A	X	A	X	X	X	0	12	F
SEN_RT_159.2015	2015	X	X	X	X	C	G	X	G	T	X	T	X	X	C	X	X	C	X	X	G	C	C	X	G	0	13	F
SEN_RT_138.2014	2014	X	A	X	C	X	C	X	X	T	X	X	X	X	A	C	X	T	X	A	G	X	T	X	X	0	14	F
SEN_RT_510.2013	2013	X	X	X	T	C	G	X	X	A	X	T	X	X	X	C	X	C	X	A	G	X	X	X	G	0	14	F
SEN_RT_602.2014	2014	X	X	C	X	C	G	A	X	X	C	T	X	X	X	A	C	X	X	X	G	A	X	X	X	0	14	F
SEN_RT_096.2012	2012	X	A	T	X	C	X	X	X	X	X	C	X	X	A	X	X	C	X	X	G	X	T	X	G	0	15	F
SEN_RT_167.2015	2015	T	X	T	T	C	X	N	A	X	X	X	G	X	X	X	X	X	X	X	X	X	C	X	G	1	15	F
SEN_RT_180.2013	2013	T	X	X	X	X	C	X	G	X	T	X	X	X	A	C	X	C	X	A	X	X	X	X	G	0	15	F
SEN_RT_236.2013	2013	X	X	N	X	C	G	A	X	T	X	X	X	T	X	X	X	C	A	A	X	X	X	X	X	1	15	F
SEN_RT_568.2014	2014	C	X	X	X	X	C	X	X	A	X	X	G	X	X	A	X	C	X	C	G	X	T	X	X	0	15	F
SEN_RT_093.2012	2012	X	X	X	X	X	G	A	G	X	X	X	X	X	C	N	C	T	X	X	G	X	X	X	X	1	16	F
SEN_RT_298.2015	2015	C	X	X	T	N	X	X	G	A	C	X	X	X	X	X	X	C	X	X	G	X	X	X	X	1	16	F
SEN_RT_540.2013	2013	X	X	T	X	X	X	X	G	X	X	C	X	X	X	X	X	C	X	X	A	C	T	X	G	0	16	F
SEN_RT_154.2013	2013	X	X	T	X	X	C	X	X	T	X	X	A	X	X	C	X	T	X	X	G	X	X	X	X	0	17	F
SEN_RT_373.2015	2015	X	X	X	T	X	C	A	X	T	X	X	X	X	X	X	X	X	X	X	G	X	T	X	G	0	17	F
SEN_RT_389.2012	2012	N	X	X	X	X	C	X	X	T	X	X	X	X	X	X	X	T	X	A	G	X	T	X	X	1	17	F
SEN_RT_408.2013	2013	X	X	X	X	C	C	X	X	T	X	X	X	X	X	X	X	T	X	A	G	X	T	X	X	0	17	F
SEN_RT_436.2013	2013	X	X	X	X	X	C	X	X	T	X	X	X	X	X	C	X	C	X	A	G	X	C	X	X	0	17	F
SEN_RT_479.2013	2013	X	X	X	T	X	C	X	X	A	X	X	G	X	X	X	X	X	X	A	G	X	X	X	G	0	17	F
SEN_RT_565.2014	2014	X	X	X	T	X	C	X	G	X	X	X	X	X	X	X	X	T	X	X	G	X	T	X	G	0	17	F
SEN_RT_073.2013	2013	X	A	X	X	X	X	G	G	X	X	X	A	X	X	C	C	X	X	X	X	X	X	X	X	0	18	F
SEN_RT_190.2013	2013	N	X	X	X	X	G	A	G	X	X	X	X	X	X	C	X	X	X	X	X	X	X	X	G	1	18	F
SEN_RT_329.2014	2014	X	X	X	X	X	G	X	G	T	X	X	X	X	X	C	X	X	X	A	X	X	T	X	X	0	18	F
SEN_RT_220.2013	2013	X	A	X	T	C	X	X	X	X	X	X	X	X	A	X	X	X	X	A	X	X	X	X	X	0	19	F
SEN_RT_297.2015	2015	X	X	X	X	G	X	X	G	T	C	X	X	X	X	X	X	X	X	A	X	X	X	X	X	0	19	F
SEN_RT_549.2013	2013	X	X	X	X	X	X	X	X	T	X	C	X	X	X	X	X	T	X	A	X	X	N	X	X	1	19	F
SEN_RT_646.2015	2015	X	X	X	X	X	X	X	X	T	X	T	X	X	X	X	X	X	X	A	A	X	T	X	X	0	19	F
SEN_RT_074.2013	2013	X	X	X	X	X	X	X	X	T	X	X	X	X	X	X	X	T	X	C	X	X	T	X	X	0	20	F
SEN_RT_091.2012	2012	X	X	X	X	X	X	X	G	T	X	X	X	X	X	X	X	T	X	X	N	X	X	X	X	1	20	F
SEN_RT_237.2013	2013	X	X	C	C	C	X	X	X	X	X	X	X	X	X	X	X	X	X	X	G	X	X	X	X	0	20	F
SEN_RT_325.2014	2014	X	A	X	X	X	X	A	X	X	X	X	X	X	X	C	C	X	X	X	X	X	X	X	X	0	20	F
SEN_RT_372.2015	2015	T	A	X	X	X	X	X	X	X	X	X	X	X	X	N	X	X	X	X	G	X	X	X	X	1	20	F
SEN_RT_635.2015	2015	X	A	X	X	C	X	X	X	X	X	T	X	T	X	X	X	X	X	X	X	X	X	X	X	0	20	F
SEN_RT_170.2015	2015	X	X	X	X	X	G	X	G	X	X	X	X	X	X	A	X	X	X	X	X	X	X	X	X	0	21	F
SEN_RT_214.2013	2013	X	X	X	X	X	X	X	X	A	X	C	X	X	X	X	X	X	X	A	X	X	X	X	X	0	21	F
SEN_RT_215.2013	2013	X	X	X	X	X	X	X	X	A	X	X	X	X	X	C	X	X	X	A	X	X	X	X	X	0	21	F
SEN_RT_330.2014	2014	X	X	X	X	X	X	X	X	X	X	X	X	X	X	A	X	X	X	X	G	X	C	X	X	0	21	F
SEN_RT_388.2012	2012	X	X	X	X	X	X	X	X	X	X	X	X	X	X	X	X	X	X	C	G	X	T	X	X	0	21	F
SEN_RT_416.2013	2013	X	X	X	X	X	X	X	X	T	X	X	X	X	X	C	X	X	X	X	G	X	X	X	X	0	21	F
SEN_RT_501.2013	2013	X	X	X	X	X	X	X	G	X	X	X	X	X	X	X	X	T	X	X	X	X	X	X	G	0	21	F
SEN_RT_561.2014	2014	X	X	X	X	C	X	X	X	X	X	X	X	X	X	X	X	X	X	X	G	X	T	X	X	0	21	F
SEN_RT_627.2015	2015	X	X	X	X	X	X	X	X	X	X	X	G	X	X	X	C	X	X	X	X	X	T	X	X	0	21	F
SEN_RT_736.2015	2015	X	X	X	X	X	X	X	X	X	X	X	X	C	X	C	X	T	X	X	X	X	X	X	X	0	21	F
SEN_RT_192.2013	2013	X	X	X	X	C	X	G	X	X	X	X	X	X	X	X	X	X	X	X	X	X	X	X	X	0	22	F
SEN_RT_213.2013	2013	X	X	X	X	X	X	A	X	X	X	X	X	X	X	X	X	X	X	X	X	X	X	X	T	0	22	F
SEN_RT_350.2015	2015	X	X	X	T	X	X	X	X	X	X	X	X	X	X	X	X	X	X	X	X	X	X	X	G	0	22	F
SEN_RT_546.2013	2013	X	X	X	X	X	X	X	X	X	X	X	X	X	X	X	X	X	X	X	G	X	T	X	X	0	22	F
SEN_RT_221.2013	2013	X	X	X	X	X	X	X	X	X	X	T	X	X	X	X	X	X	X	X	X	X	X	X	X	0	23	F
SEN_RT_320.2014	2014	X	X	X	X	X	X	X	X	X	X	X	X	X	X	X	X	X	X	X	X	X	X	X	G	0	23	F
SEN_RT_523.2013	2013	X	X	X	X	X	X	X	X	X	X	X	X	X	X	X	X	C	X	X	X	X	X	X	X	0	23	F
SEN_RT_527.2013	2013	X	X	X	X	X	X	X	X	X	X	X	X	X	X	X	X	C	X	X	X	X	X	X	X	0	23	F
SEN_RT_542.2013	2013	X	X	X	X	X	X	X	X	X	X	X	X	X	X	X	X	X	X	X	X	X	T	X	X	0	23	F
SEN_RT_548.2013	2013	X	X	X	X	X	X	X	X	X	X	X	X	X	X	X	X	X	X	X	X	X	T	X	X	0	23	F
SEN_RT_550.2013	2013	X	X	X	X	X	X	X	X	X	X	X	X	X	X	X	X	X	X	X	X	X	T	X	X	0	23	F
SEN_RT_551.2013	2013	X	X	X	X	X	X	X	X	X	X	X	X	X	X	X	X	X	X	X	X	X	T	X	X	0	23	F
SEN_RT_552.2013	2013	X	X	X	X	X	X	X	X	X	X	X	X	X	X	X	X	X	X	X	X	X	T	X	X	0	23	F
SEN_RT_553.2013	2013	X	X	X	X	X	X	X	X	X	X	X	X	X	X	X	X	X	X	X	X	X	T	X	X	0	23	F
SEN_RT_554.2013	2013	X	X	X	X	X	X	X	X	X	X	X	X	X	X	X	X	X	X	X	X	X	T	X	X	0	23	F
SEN_RT_562.2014	2014	X	X	X	X	X	X	X	X	X	X	X	X	X	X	X	X	X	X	X	X	X	T	X	X	0	23	F
SEN_RT_572.2014	2014	X	X	X	X	X	X	X	X	X	X	X	X	X	A	X	X	X	X	X	X	X	X	X	X	0	23	F
SEN_RT_623.2015	2015	X	X	X	X	X	X	X	X	X	X	X	X	X	X	X	X	X	X	X	G	X	X	X	X	0	23	F
SEN_RT_626.2015	2015	X	X	X	X	X	X	X	X	X	X	X	X	X	X	X	X	C	X	X	X	X	X	X	X	0	23	F
SEN_RT_143.2013	2013	X	X	X	X	X	X	X	X	X	X	X	X	X	X	X	X	X	X	X	X	X	X	X	X	0	24	F
SEN_RT_205.2014	2014	X	X	X	X	X	X	X	X	X	X	X	X	X	X	X	X	X	X	X	X	X	X	X	X	0	24	F
SEN_RT_206.2014	2014	X	X	X	X	X	X	X	X	X	X	X	X	X	X	X	X	X	X	X	X	X	X	X	X	0	24	F
SEN_RT_233.2013	2013	X	X	X	X	X	X	X	X	X	X	X	X	X	X	X	X	X	X	X	X	X	X	X	X	0	24	F
SEN_RT_293.2015	2015	X	X	X	X	X	X	X	X	X	X	X	X	X	X	X	X	X	X	X	X	X	X	X	X	0	24	F
SEN_RT_518.2013	2013	X	X	X	X	X	X	X	X	X	X	X	X	X	X	X	X	X	X	X	X	X	X	X	X	0	24	F
SEN_RT_584.2014	2014	X	X	X	X	X	X	X	X	X	X	X	X	X	X	X	X	X	X	X	X	X	X	X	X	0	24	F
SEN_RT_638.2015	2015	X	X	X	X	X	X	X	X	X	X	X	X	X	X	X	X	X	X	X	X	X	X	X	X	0	24	F
SEN_RT_639.2015	2015	X	X	X	X	X	X	X	X	X	X	X	X	X	X	X	X	X	X	X	X	X	X	X	X	0	24	F
SEN_RT_641.2015	2015	X	X	X	X	X	X	X	X	X	X	X	X	X	X	X	X	X	X	X	X	X	X	X	X	0	24	F
