# Supplementary material for: Genetic evidence for imported malaria and local transmission in Richard Toll, Senegal
Source: Malar J. 2020 Aug 3;19:276. doi: 10.1186/s12936-020-03346-x (PMC7397603; doi:10.1186/s12936-020-03346-x)
Supplement: Supplementary file 4 — Additional file 4. Thiès parasite genotyping data. [file 12936_2020_3346_MOESM4_ESM.xlsx]

## Sheet: Sheet1
Sample Name	Year	A1	B1	A2	B2	A3	B3	A4	B4	A5	B5	A6	B6	A7	B7	A8	B8	A9	B9	A10	B10	A11	B11	A12	B12	MIXED	MISSING	P/F	M/P	TALLY
SEN_TH_009.2006	2006	C	G	C	T	C	G	G	G	A	T	T	G	T	A	C	A	C	A	C	G	C	T	T	G	0	0	P	M	PASS_MONO	1555
SEN_TH_134.2006	2006	T	A	C	T	C	C	G	G	T	T	T	A	T	A	C	C	C	A	A	G	C	C	T	G	0	0	P	M	PASS_POLY	70
SEN_TH_098.2006	2006	T	A	C	T	C	C	G	G	T	T	T	A	T	A	C	C	C	A	A	G	C	C	T	G	0	0	P	M	PASS_TOTAL	1625
SEN_TH_211.2006	2006	T	A	C	T	G	C	A	G	T	C	C	A	T	C	C	C	C	T	A	G	C	T	T	G	0	0	P	M	FAIL	7
SEN_TH_080.2006	2006	T	A	C	T	G	C	A	G	T	C	C	A	T	C	C	C	C	T	A	G	C	T	T	G	0	0	P	M	TOTAL	1632
SEN_TH_194.2006	2006	T	A	C	C	G	G	A	G	A	C	T	G	C	A	C	A	C	T	A	G	A	C	T	G	0	0	P	M
SEN_TH_196.2006	2006	T	A	C	C	G	G	A	G	A	C	T	G	C	A	C	A	C	T	A	G	A	C	T	G	0	0	P	M	MONO + MISSING 0,1	1516
SEN_TH_003.2006	2006	T	A	C	T	C	C	G	A	T	T	C	A	C	A	A	C	T	T	C	G	A	C	T	G	0	0	P	M
SEN_TH_004.2006	2006	C	A	C	T	G	C	G	G	T	T	C	G	T	A	C	C	T	A	A	G	A	T	T	G	0	0	P	M
SEN_TH_005.2006	2006	T	A	C	T	C	C	A	A	A	T	T	G	C	C	C	A	C	A	A	G	A	T	T	G	0	0	P	M
SEN_TH_006.2006	2006	T	A	T	T	C	C	A	G	A	T	C	G	C	A	A	C	C	A	A	G	A	T	T	G	0	0	P	M
SEN_TH_010.2006	2006	T	A	T	T	C	G	A	G	A	C	T	G	T	A	C	C	C	T	C	G	C	C	T	G	0	0	P	M
SEN_TH_015.2006	2006	T	G	C	T	C	C	A	G	A	T	T	A	T	A	A	C	T	T	C	G	A	C	T	G	0	0	P	M
SEN_TH_016.2006	2006	T	A	T	T	C	C	G	G	T	T	T	G	C	A	C	C	T	A	A	A	A	T	T	G	0	0	P	M
SEN_TH_018.2006	2006	T	A	C	T	G	C	A	G	A	T	T	G	T	C	A	C	T	T	A	A	A	C	T	G	0	0	P	M
SEN_TH_020.2006	2006	T	A	C	T	C	C	G	A	A	C	T	G	T	C	C	C	C	A	C	G	C	T	T	G	0	0	P	M
SEN_TH_022.2006	2006	T	A	C	T	G	C	A	G	A	T	T	A	T	A	A	C	C	A	A	G	C	T	T	G	0	0	P	M
SEN_TH_023.2006	2006	T	A	C	T	C	C	G	G	T	T	T	A	T	A	C	A	C	T	A	G	C	T	T	G	0	0	P	M
SEN_TH_024.2006	2006	T	A	C	T	C	C	A	G	A	T	C	G	C	A	A	C	T	A	A	G	C	T	T	G	0	0	P	M
SEN_TH_028.2006	2006	T	A	C	T	C	G	A	G	A	C	T	G	T	C	C	C	T	T	C	G	A	C	T	G	0	0	P	M
SEN_TH_029.2006	2006	T	A	C	T	C	G	G	G	T	C	C	G	T	A	C	C	C	A	A	G	A	C	T	G	0	0	P	M
SEN_TH_031.2006	2006	T	A	C	T	G	G	G	G	T	T	T	A	T	A	A	C	T	A	A	A	A	T	T	G	0	0	P	M
SEN_TH_036.2006	2006	T	A	T	T	C	G	G	A	A	T	T	G	C	C	A	C	T	T	C	G	C	C	T	G	0	0	P	M
SEN_TH_037.2006	2006	T	A	C	T	C	C	A	G	A	C	T	G	C	A	A	C	T	T	C	G	C	T	T	G	0	0	P	M
SEN_TH_038.2006	2006	T	A	T	T	C	C	G	G	A	C	T	G	T	A	A	C	C	T	A	G	C	C	T	G	0	0	P	M
SEN_TH_052.2006	2006	C	A	C	T	C	C	A	G	T	T	T	A	C	A	A	C	C	T	C	G	C	C	T	G	0	0	P	M
SEN_TH_053.2006	2006	C	A	T	T	G	C	A	G	A	T	T	G	C	A	C	C	T	A	C	A	A	C	T	G	0	0	P	M
SEN_TH_055.2006	2006	C	A	C	T	G	G	A	A	A	T	C	G	T	A	C	C	C	A	A	A	A	T	T	G	0	0	P	M
SEN_TH_056.2006	2006	C	A	C	T	G	G	A	A	T	T	T	A	T	A	C	A	C	A	A	G	C	C	T	G	0	0	P	M
SEN_TH_057.2006	2006	T	A	C	T	C	G	G	G	A	T	C	A	C	A	C	A	T	A	C	G	C	T	T	G	0	0	P	M
SEN_TH_059.2006	2006	T	A	C	T	C	C	A	G	T	T	C	G	C	A	A	C	T	A	A	G	C	T	T	G	0	0	P	M
SEN_TH_060.2006	2006	T	A	C	T	G	C	A	G	A	T	T	A	C	A	A	C	C	A	A	G	A	T	T	G	0	0	P	M
SEN_TH_063.2006	2006	T	A	C	T	C	G	G	A	A	C	T	G	C	A	C	C	C	A	A	A	A	C	T	G	0	0	P	M
SEN_TH_065.2006	2006	C	A	T	T	G	C	A	G	A	T	T	G	C	A	C	C	T	T	A	A	A	T	T	G	0	0	P	M
SEN_TH_068.2006	2006	T	A	C	T	G	C	A	G	T	C	T	G	T	C	A	C	T	T	A	G	A	C	T	G	0	0	P	M
SEN_TH_079.2006	2006	T	A	C	T	C	C	G	G	A	T	T	A	C	A	C	C	T	T	A	G	A	T	T	G	0	0	P	M
SEN_TH_083.2006	2006	T	A	T	T	G	C	A	G	A	C	C	G	C	A	A	A	T	T	A	G	A	T	T	G	0	0	P	M
SEN_TH_086.2006	2006	T	A	C	T	C	C	G	A	A	T	C	G	C	A	C	C	T	T	A	A	A	T	T	G	0	0	P	M
SEN_TH_093.2006	2006	C	A	T	T	C	C	A	G	A	C	C	A	C	A	C	C	C	T	A	G	A	T	T	G	0	0	P	M
SEN_TH_095.2006	2006	T	A	C	C	C	C	A	G	T	T	T	A	C	C	C	C	C	T	C	G	A	T	T	G	0	0	P	M
SEN_TH_099.2006	2006	T	A	T	T	C	G	A	G	T	T	C	G	C	C	A	C	C	T	A	G	A	T	T	G	0	0	P	M
SEN_TH_103.2006	2006	C	A	C	T	C	C	A	G	A	C	C	G	T	A	C	C	C	A	C	G	A	C	T	G	0	0	P	M
SEN_TH_105.2006	2006	T	A	T	T	C	G	G	G	A	C	T	A	C	A	C	A	T	T	A	A	A	T	T	G	0	0	P	M
SEN_TH_108.2006	2006	T	A	C	T	C	G	A	G	T	C	C	G	T	A	A	C	C	A	A	G	A	C	T	G	0	0	P	M
SEN_TH_115.2006	2006	T	A	C	T	G	G	A	G	A	C	T	G	C	A	A	A	T	A	A	A	C	C	T	G	0	0	P	M
SEN_TH_120.2006	2006	C	A	C	T	G	C	A	G	A	C	T	A	T	A	A	C	C	A	C	A	C	T	T	G	0	0	P	M
SEN_TH_128.2006	2006	T	A	C	T	C	C	G	G	T	T	T	A	C	A	C	C	T	T	C	G	C	T	T	G	0	0	P	M
SEN_TH_136.2006	2006	T	A	C	T	G	G	G	G	A	C	C	G	C	C	A	C	T	A	C	G	A	T	T	G	0	0	P	M
SEN_TH_139.2006	2006	T	A	C	T	C	G	A	G	A	C	C	A	C	C	C	C	T	A	A	G	C	C	T	G	0	0	P	M
SEN_TH_140.2006	2006	T	A	C	T	G	G	A	G	A	T	C	A	C	A	A	C	T	A	A	G	A	C	T	G	0	0	P	M
SEN_TH_141.2006	2006	C	A	C	T	G	C	G	G	A	C	C	G	C	A	A	C	C	A	A	G	C	T	T	G	0	0	P	M
SEN_TH_148.2006	2006	C	A	C	T	C	C	G	G	A	T	T	A	T	A	A	C	C	A	A	G	C	T	T	G	0	0	P	M
SEN_TH_150.2006	2006	T	A	C	T	C	C	A	G	A	C	C	G	T	C	A	C	C	A	A	G	A	C	T	G	0	0	P	M
SEN_TH_155.2006	2006	T	A	T	T	C	C	A	A	T	C	C	G	C	A	C	A	T	A	A	G	C	C	T	G	0	0	P	M
SEN_TH_158.2006	2006	T	A	C	C	C	C	G	G	A	C	C	G	C	A	C	C	C	T	C	G	A	T	T	G	0	0	P	M
SEN_TH_161.2006	2006	C	A	C	T	C	G	A	G	A	C	C	A	C	A	C	A	C	T	C	G	C	C	T	G	0	0	P	M
SEN_TH_163.2006	2006	C	A	C	T	C	C	G	G	A	T	T	G	C	C	A	A	T	T	C	G	A	C	T	G	0	0	P	M
SEN_TH_170.2006	2006	T	G	C	T	C	C	A	G	A	T	T	G	C	C	C	C	C	T	A	G	A	C	T	G	0	0	P	M
SEN_TH_178.2006	2006	T	A	C	T	C	C	G	G	A	C	C	A	C	A	A	C	C	T	A	A	C	T	T	G	0	0	P	M
SEN_TH_184.2006	2006	T	G	C	T	G	C	G	G	T	C	C	G	C	C	A	A	T	A	A	G	A	T	T	G	0	0	P	M
SEN_TH_199.2006	2006	T	A	C	T	C	C	G	A	A	C	T	G	T	A	C	C	C	A	A	A	A	T	T	G	0	0	P	M
SEN_TH_202.2006	2006	T	A	C	T	C	G	G	G	A	T	C	G	C	A	A	C	C	A	A	G	C	T	T	G	0	0	P	M
SEN_TH_204.2006	2006	T	A	C	T	C	C	A	G	A	T	T	A	C	C	A	A	C	A	A	G	A	C	T	G	0	0	P	M
SEN_TH_205.2006	2006	C	A	T	T	C	C	G	G	A	T	T	G	C	C	A	A	C	A	C	G	C	C	T	G	0	0	P	M
SEN_TH_206.2006	2006	C	A	T	T	C	G	G	G	A	T	C	A	T	A	C	C	T	A	A	G	A	T	T	G	0	0	P	M
SEN_TH_207.2006	2006	C	A	C	T	C	C	A	G	T	C	T	A	T	C	A	C	C	A	C	G	C	T	T	G	0	0	P	M
SEN_TH_209.2006	2006	T	A	C	T	G	C	G	G	T	C	T	A	C	A	C	C	C	T	A	A	C	C	T	G	0	0	P	M
SEN_TH_210.2006	2006	C	A	C	T	C	G	G	G	A	T	T	G	C	A	A	A	C	A	A	G	A	C	T	G	0	0	P	M
SEN_TH_212.2006	2006	T	A	T	T	C	C	A	G	A	C	T	G	C	A	C	C	T	T	C	G	C	T	T	G	0	0	P	M
SEN_TH_215.2006	2006	C	A	C	T	C	C	A	G	A	C	T	G	C	C	C	C	T	T	A	G	C	T	T	G	0	0	P	M
SEN_TH_217.2006	2006	C	A	C	T	C	C	A	G	T	C	C	G	T	A	A	C	C	A	A	G	A	C	T	G	0	0	P	M
SEN_TH_218.2006	2006	T	A	C	T	C	C	G	G	T	T	T	A	T	A	A	A	C	T	A	G	A	C	T	G	0	0	P	M
SEN_TH_231.2006	2006	C	A	C	T	G	G	A	G	A	T	T	G	C	A	A	C	T	A	A	G	A	C	T	G	0	0	P	M
SEN_TH_238.2006	2006	T	A	C	T	G	G	G	G	T	T	T	A	T	C	C	A	T	A	A	G	C	C	T	G	0	0	P	M
SEN_TH_240.2006	2006	C	A	C	T	C	C	G	G	A	T	T	A	T	A	C	A	C	A	A	G	A	T	T	G	0	0	P	M
SEN_TH_242.2006	2006	T	A	C	T	C	C	G	G	T	C	C	G	T	A	C	C	C	A	C	A	C	T	T	G	0	0	P	M
SEN_TH_015.2007	2007	C	G	C	T	C	G	G	G	A	T	T	G	T	A	C	A	C	A	C	G	C	T	T	G	0	0	P	M
SEN_TH_125.2007	2007	T	A	C	T	C	C	A	G	A	C	C	G	T	A	C	C	T	T	A	G	A	T	T	G	0	0	P	M
SEN_TH_086.2007	2007	T	A	C	C	C	C	G	G	T	C	C	A	C	C	A	A	T	A	A	G	A	C	T	G	0	0	P	M
SEN_TH_167.2007	2007	T	A	T	T	C	C	A	G	T	C	T	A	C	C	C	C	C	A	A	G	A	C	T	G	0	0	P	M
SEN_TH_168.2007	2007	T	A	T	T	C	C	A	G	T	C	T	A	C	C	C	C	C	A	A	G	A	C	T	G	0	0	P	M
SEN_TH_001.2007	2007	C	A	C	T	G	C	A	G	A	C	C	G	C	A	C	C	C	A	A	G	C	C	T	G	0	0	P	M
SEN_TH_011.2007	2007	C	A	C	T	G	C	A	G	A	C	C	G	C	A	C	C	C	A	A	G	C	C	T	G	0	0	P	M
SEN_TH_084.2007	2007	C	A	T	T	C	C	G	A	A	C	T	A	C	A	A	C	T	A	A	G	C	C	T	G	0	0	P	M
SEN_TH_109.2007	2007	C	A	T	T	C	C	G	A	A	C	T	A	C	A	A	C	T	A	A	G	C	C	T	G	0	0	P	M
SEN_TH_074.2007	2007	C	A	C	T	C	G	A	G	A	T	C	G	T	C	A	C	C	A	C	G	C	T	T	G	0	0	P	M
SEN_TH_079.2007	2007	C	A	C	T	C	G	A	G	A	T	C	G	T	C	A	C	C	A	C	G	C	T	T	G	0	0	P	M
SEN_TH_039.2007	2007	C	A	T	T	C	C	G	G	T	T	T	A	T	C	C	A	T	A	A	G	A	T	T	G	0	0	P	M
SEN_TH_188.2007	2007	C	A	T	T	C	C	G	G	T	T	T	A	T	C	C	A	T	A	A	G	A	T	T	G	0	0	P	M
SEN_TH_143.2007	2007	T	A	T	T	C	C	A	G	A	T	T	G	C	A	A	C	T	T	C	G	C	C	T	G	0	0	P	M
SEN_TH_145.2007	2007	T	A	T	T	C	C	A	G	A	T	T	G	C	A	A	C	T	T	C	G	C	C	T	G	0	0	P	M
SEN_TH_155.2007	2007	T	A	T	T	C	C	A	G	A	T	T	G	C	A	A	C	T	T	C	G	C	C	T	G	0	0	P	M
SEN_TH_223.2007	2007	T	A	T	T	C	C	A	G	A	T	T	G	C	A	A	C	T	T	C	G	C	C	T	G	0	0	P	M
SEN_TH_038.2007	2007	T	A	C	T	C	C	A	G	A	C	T	A	C	A	A	C	T	A	C	G	C	C	T	G	0	0	P	M
SEN_TH_047.2007	2007	T	A	C	T	C	C	A	G	A	C	T	A	C	A	A	C	T	A	C	G	C	C	T	G	0	0	P	M
SEN_TH_066.2007	2007	T	A	C	T	C	C	A	G	A	C	T	A	C	A	A	C	T	A	C	G	C	C	T	G	0	0	P	M
SEN_TH_141.2007	2007	T	A	C	T	C	C	A	G	A	C	T	A	C	A	A	C	T	A	C	G	C	C	T	G	0	0	P	M
SEN_TH_004.2007	2007	C	G	C	T	G	G	A	G	A	T	T	G	C	C	C	C	C	T	A	G	C	T	T	G	0	0	P	M
SEN_TH_006.2007	2007	C	A	T	T	C	C	G	G	A	T	T	G	C	A	C	C	T	A	A	G	A	C	T	G	0	0	P	M
SEN_TH_002.2007	2007	T	A	T	T	G	C	G	G	T	T	T	A	T	A	C	C	C	T	A	G	A	T	T	G	0	0	P	M
SEN_TH_012.2007	2007	T	A	C	T	C	C	G	A	A	C	T	G	C	C	A	A	T	A	A	G	C	T	T	G	0	0	P	M
SEN_TH_013.2007	2007	C	A	C	T	C	C	G	G	A	C	T	A	T	A	C	C	T	T	C	G	C	T	T	G	0	0	P	M
SEN_TH_018.2007	2007	T	A	C	T	C	G	G	G	T	T	T	A	T	A	C	C	T	T	C	G	A	C	T	G	0	0	P	M
SEN_TH_021.2007	2007	T	A	C	C	C	C	G	G	T	C	T	A	T	A	A	C	T	T	A	G	C	T	T	G	0	0	P	M
SEN_TH_023.2007	2007	T	A	C	T	G	G	G	G	A	C	T	G	T	A	C	A	C	A	C	G	C	C	T	G	0	0	P	M
SEN_TH_026.2007	2007	T	A	C	T	C	C	A	A	A	T	T	G	C	A	C	C	C	A	C	G	A	T	T	G	0	0	P	M
SEN_TH_030.2007	2007	C	A	C	T	C	C	A	G	A	C	C	G	C	A	C	A	T	T	A	G	A	T	T	G	0	0	P	M
SEN_TH_031.2007	2007	T	A	T	C	C	C	G	A	A	C	T	A	C	A	C	C	C	A	A	G	C	C	T	G	0	0	P	M
SEN_TH_032.2007	2007	T	A	T	C	G	C	G	A	A	C	T	A	T	A	C	C	C	A	A	G	C	C	T	G	0	0	P	M
SEN_TH_035.2007	2007	T	A	C	T	C	G	A	G	A	C	C	G	C	A	C	C	C	A	A	G	C	C	T	G	0	0	P	M
SEN_TH_036.2007	2007	C	A	T	T	G	G	A	G	A	T	C	G	C	A	C	C	T	A	A	G	A	T	T	G	0	0	P	M
SEN_TH_037.2007	2007	C	A	C	T	G	G	A	G	A	T	C	G	T	A	A	C	T	T	A	A	C	C	T	G	0	0	P	M
SEN_TH_040.2007	2007	C	A	T	T	G	C	G	G	A	T	C	A	T	A	C	C	T	A	A	G	C	T	T	G	0	0	P	M
SEN_TH_045.2007	2007	T	A	T	T	C	C	A	A	A	T	T	A	C	A	C	A	T	A	C	G	C	C	T	G	0	0	P	M
SEN_TH_046.2007	2007	T	G	C	T	C	G	G	G	A	C	T	G	C	C	C	C	C	T	C	G	A	T	T	G	0	0	P	M
SEN_TH_048.2007	2007	T	A	C	T	C	C	G	G	A	C	T	G	T	C	A	C	C	T	A	G	C	C	T	G	0	0	P	M
SEN_TH_049.2007	2007	T	A	C	T	C	G	A	G	A	T	T	A	T	A	C	A	T	T	A	G	C	T	T	G	0	0	P	M
SEN_TH_051.2007	2007	T	A	C	T	C	G	G	G	T	C	T	G	C	A	A	C	C	A	A	A	A	T	T	G	0	0	P	M
SEN_TH_052.2007	2007	C	A	C	T	C	G	A	G	T	T	T	A	C	A	A	C	C	T	A	A	A	C	T	G	0	0	P	M
SEN_TH_053.2007	2007	T	A	C	T	C	C	A	G	A	C	C	G	C	A	A	A	C	A	C	G	C	C	T	G	0	0	P	M
SEN_TH_054.2007	2007	T	A	T	T	G	C	G	G	A	T	T	A	T	A	C	A	C	A	A	G	C	T	T	G	0	0	P	M
SEN_TH_061.2007	2007	T	A	C	T	C	G	A	G	A	T	T	A	T	A	C	C	C	A	A	G	A	T	T	G	0	0	P	M
SEN_TH_064.2007	2007	T	A	C	T	C	G	G	G	A	C	T	A	T	C	A	C	C	T	C	G	A	T	T	G	0	0	P	M
SEN_TH_070.2007	2007	T	A	T	T	C	C	A	G	A	T	T	G	C	A	A	A	T	T	A	G	A	T	T	G	0	0	P	M
SEN_TH_071.2007	2007	T	A	T	T	C	G	A	G	T	T	T	A	T	C	C	C	C	A	C	G	A	T	T	G	0	0	P	M
SEN_TH_075.2007	2007	T	A	C	T	C	C	A	G	T	C	T	A	C	A	A	C	T	T	A	G	A	T	T	G	0	0	P	M
SEN_TH_080.2007	2007	C	A	C	T	G	C	G	G	A	C	C	A	C	A	A	C	C	T	C	G	C	C	T	G	0	0	P	M
SEN_TH_082.2007	2007	T	A	C	T	G	G	G	G	A	T	T	G	T	A	C	C	C	A	A	G	C	C	T	G	0	0	P	M
SEN_TH_087.2007	2007	T	A	T	T	C	C	A	G	A	T	T	G	T	A	A	C	C	A	A	G	A	T	T	G	0	0	P	M
SEN_TH_088.2007	2007	C	A	C	T	C	C	A	G	A	T	C	A	T	C	A	C	C	T	A	G	C	C	T	G	0	0	P	M
SEN_TH_091.2007	2007	T	A	T	T	C	C	A	G	T	T	T	A	T	A	A	C	C	A	C	A	A	C	T	G	0	0	P	M
SEN_TH_094.2007	2007	T	A	C	C	C	C	A	G	A	C	T	G	T	C	C	C	C	T	A	G	C	T	T	G	0	0	P	M
SEN_TH_096.2007	2007	C	A	C	T	C	C	A	G	A	T	T	A	C	C	C	A	T	A	C	G	A	T	T	G	0	0	P	M
SEN_TH_098.2007	2007	C	A	C	T	C	C	G	G	T	C	T	A	C	C	C	A	C	A	C	G	C	C	T	G	0	0	P	M
SEN_TH_099.2007	2007	T	A	T	T	G	G	G	G	T	T	T	A	T	A	C	C	C	T	C	G	C	C	T	G	0	0	P	M
SEN_TH_100.2007	2007	T	A	C	T	C	C	A	G	A	T	C	G	C	A	C	C	T	A	A	A	A	T	T	G	0	0	P	M
SEN_TH_102.2007	2007	T	A	T	T	C	C	A	G	A	C	C	G	C	A	C	C	C	T	A	G	C	C	T	G	0	0	P	M
SEN_TH_103.2007	2007	T	A	T	T	C	C	A	G	A	C	C	A	C	A	C	C	C	T	A	G	C	C	T	G	0	0	P	M
SEN_TH_104.2007	2007	C	A	C	T	C	C	A	G	A	C	C	A	T	A	C	C	T	A	A	G	A	C	T	G	0	0	P	M
SEN_TH_110.2007	2007	C	A	T	T	C	G	A	A	A	C	C	G	C	A	C	C	C	A	C	A	A	T	T	G	0	0	P	M
SEN_TH_117.2007	2007	T	A	C	T	C	C	G	G	A	C	T	A	C	A	C	A	C	T	C	G	A	T	T	G	0	0	P	M
SEN_TH_118.2007	2007	C	A	C	T	C	G	A	A	T	C	C	G	C	C	C	C	T	A	C	G	C	T	T	G	0	0	P	M
SEN_TH_119.2007	2007	T	A	C	T	G	C	A	G	A	C	T	G	T	C	A	C	C	T	C	A	A	T	T	G	0	0	P	M
SEN_TH_120.2007	2007	T	A	T	T	C	C	G	G	T	C	C	A	C	A	C	C	C	T	A	A	A	T	T	G	0	0	P	M
SEN_TH_128.2007	2007	T	A	C	T	C	C	G	G	A	C	C	A	C	A	C	A	C	T	C	G	A	T	T	G	0	0	P	M
SEN_TH_133.2007	2007	T	A	C	T	G	C	A	A	A	T	T	G	T	A	C	C	C	A	A	G	A	C	T	G	0	0	P	M
SEN_TH_137.2007	2007	T	A	C	T	G	C	G	G	A	T	T	G	T	A	C	A	C	A	A	G	C	C	T	G	0	0	P	M
SEN_TH_139.2007	2007	T	A	C	C	G	C	A	G	T	C	C	G	T	A	C	C	T	T	C	G	C	T	T	G	0	0	P	M
SEN_TH_142.2007	2007	T	A	C	T	C	C	G	G	A	C	C	A	C	A	C	C	C	A	C	G	A	T	T	G	0	0	P	M
SEN_TH_144.2007	2007	T	A	C	T	G	C	A	G	A	C	C	G	C	C	A	C	T	A	A	G	C	C	T	G	0	0	P	M
SEN_TH_146.2007	2007	T	A	C	T	C	C	A	G	A	C	C	A	C	A	A	A	C	A	A	A	C	T	T	G	0	0	P	M
SEN_TH_150.2007	2007	C	A	C	C	C	G	A	G	T	T	T	A	C	C	A	C	C	A	A	A	A	C	T	G	0	0	P	M
SEN_TH_151.2007	2007	T	A	C	T	C	G	A	G	A	C	T	G	C	A	A	C	C	T	A	G	A	T	T	G	0	0	P	M
SEN_TH_154.2007	2007	C	A	T	T	C	C	A	G	T	T	T	A	T	A	C	C	C	T	A	G	A	C	T	G	0	0	P	M
SEN_TH_160.2007	2007	C	A	C	T	C	C	A	G	A	T	C	G	C	A	C	A	C	A	C	G	C	T	T	G	0	0	P	M
SEN_TH_164.2007	2007	T	A	C	T	G	C	A	G	A	C	T	G	C	A	A	C	C	T	A	G	A	C	T	G	0	0	P	M
SEN_TH_177.2007	2007	C	A	T	C	C	C	G	A	A	T	T	G	T	A	C	C	C	A	A	G	C	C	T	G	0	0	P	M
SEN_TH_178.2007	2007	C	A	T	T	G	C	A	G	A	C	C	G	C	A	C	A	T	A	C	A	A	T	T	G	0	0	P	M
SEN_TH_182.2007	2007	T	G	T	T	G	C	A	G	T	T	T	A	T	A	C	A	C	A	C	G	C	C	T	G	0	0	P	M
SEN_TH_184.2007	2007	C	A	T	T	G	C	A	G	T	T	C	A	C	A	C	C	T	A	A	G	A	T	T	G	0	0	P	M
SEN_TH_192.2007	2007	T	A	C	T	C	C	A	G	A	C	T	G	T	C	A	C	C	A	C	G	A	T	T	G	0	0	P	M
SEN_TH_193.2007	2007	T	G	C	T	C	G	G	G	T	T	T	A	T	A	A	C	C	T	A	G	A	T	T	G	0	0	P	M
SEN_TH_202.2007	2007	T	A	T	T	C	G	A	G	A	C	T	A	T	A	C	C	C	A	A	G	A	C	T	G	0	0	P	M
SEN_TH_203.2007	2007	T	A	T	T	C	C	A	G	A	C	T	G	T	A	C	C	C	T	A	G	A	T	T	G	0	0	P	M
SEN_TH_208.2007	2007	T	A	C	T	C	G	G	G	A	T	T	G	C	A	A	C	C	A	A	G	A	T	T	G	0	0	P	M
SEN_TH_215.2007	2007	T	A	C	T	C	G	G	A	A	T	T	A	C	A	A	C	T	A	A	G	C	T	T	G	0	0	P	M
SEN_TH_220.2007	2007	T	A	C	T	G	G	G	A	A	T	C	G	C	A	A	C	C	A	C	G	A	T	T	G	0	0	P	M
SEN_TH_071.2008	2008	C	A	C	T	G	C	G	G	A	T	T	G	T	A	C	C	T	A	A	G	A	C	T	G	0	0	P	M
SEN_TH_119.2008	2008	C	A	C	T	G	C	G	G	A	T	T	G	T	A	C	C	T	A	A	G	A	C	T	G	0	0	P	M
SEN_TH_001.2008	2008	T	A	T	T	C	C	G	G	T	C	C	G	T	C	C	C	C	T	C	G	C	T	T	G	0	0	P	M
SEN_TH_003.2008	2008	T	A	T	T	C	C	G	G	T	C	C	G	T	C	C	C	C	T	C	G	C	T	T	G	0	0	P	M
SEN_TH_170.2008	2008	T	A	C	T	G	C	A	G	A	T	T	G	T	A	C	C	C	A	A	A	A	C	T	G	0	0	P	M
SEN_TH_235.2008	2008	T	A	C	T	G	C	A	G	A	T	T	G	T	A	C	C	C	A	A	A	A	C	T	G	0	0	P	M
SEN_TH_157.2008	2008	T	A	C	T	G	G	G	G	A	T	T	A	C	A	C	A	C	A	A	G	A	C	T	G	0	0	P	M
SEN_TH_197.2008	2008	T	A	C	T	G	G	G	G	A	T	T	A	C	A	C	A	C	A	A	G	A	C	T	G	0	0	P	M
SEN_TH_131.2008	2008	T	A	C	T	C	C	A	G	T	C	C	A	T	A	C	A	C	A	C	G	A	T	T	G	0	0	P	M
SEN_TH_148.2008	2008	T	A	C	T	C	C	A	G	T	C	C	A	T	A	C	A	C	A	C	G	A	T	T	G	0	0	P	M
SEN_TH_070.2008	2008	T	A	T	T	C	G	A	A	A	T	C	G	C	A	C	C	C	T	A	G	A	T	T	G	0	0	P	M
SEN_TH_090.2008	2008	T	A	T	T	C	G	A	A	A	T	C	G	C	A	C	C	C	T	A	G	A	T	T	G	0	0	P	M
SEN_TH_106.2008	2008	C	A	C	T	C	C	A	G	T	C	T	A	C	A	C	C	T	T	C	G	A	C	T	G	0	0	P	M
SEN_TH_126.2008	2008	C	A	C	T	C	C	A	G	T	C	T	A	C	A	C	C	T	T	C	G	A	C	T	G	0	0	P	M
SEN_TH_234.2008	2008	C	A	C	T	C	C	A	G	T	C	T	A	C	A	C	C	T	T	C	G	A	C	T	G	0	0	P	M
SEN_TH_025.2008	2008	T	A	C	T	C	C	G	G	T	T	C	G	C	A	C	A	C	A	C	G	A	C	T	G	0	0	P	M
SEN_TH_042.2008	2008	T	A	C	T	C	C	G	G	T	T	C	G	C	A	C	A	C	A	C	G	A	C	T	G	0	0	P	M
SEN_TH_073.2008	2008	T	A	C	T	C	C	G	G	T	T	C	G	C	A	C	A	C	A	C	G	A	C	T	G	0	0	P	M
SEN_TH_044.2008	2008	T	A	C	T	C	C	G	G	T	T	T	G	C	A	C	A	C	A	C	G	A	C	T	G	0	0	P	M
SEN_TH_101.2008	2008	T	A	C	T	C	C	G	G	T	T	T	G	C	A	C	A	C	A	C	G	A	C	T	G	0	0	P	M
SEN_TH_105.2008	2008	T	A	C	T	C	C	G	G	T	T	T	G	C	A	C	A	C	A	C	G	A	C	T	G	0	0	P	M
SEN_TH_250.2008	2008	T	A	C	T	C	C	G	G	T	T	T	G	C	A	C	A	C	A	C	G	A	C	T	G	0	0	P	M
SEN_TH_002.2008	2008	T	A	C	T	G	G	G	G	A	T	T	G	C	A	C	C	T	A	C	G	A	C	T	G	0	0	P	M
SEN_TH_015.2008	2008	C	A	C	T	G	G	A	G	T	C	C	G	T	C	C	C	C	T	A	G	C	T	T	G	0	0	P	M
SEN_TH_022.2008	2008	T	A	C	T	G	C	A	G	T	T	T	A	T	C	C	A	T	A	C	G	A	T	T	G	0	0	P	M
SEN_TH_024.2008	2008	T	A	T	T	G	C	G	G	T	C	C	G	T	C	A	A	T	T	A	G	A	T	T	G	0	0	P	M
SEN_TH_033.2008	2008	T	A	T	C	G	C	A	G	A	T	C	A	C	A	C	A	T	A	C	G	A	T	T	G	0	0	P	M
SEN_TH_034.2008	2008	T	A	C	T	C	C	A	G	A	T	C	A	C	A	C	C	C	A	A	G	A	T	T	G	0	0	P	M
SEN_TH_035.2008	2008	C	A	C	T	G	C	G	G	T	T	T	A	T	A	A	C	C	T	C	A	A	C	T	G	0	0	P	M
SEN_TH_037.2008	2008	C	A	T	T	C	C	G	G	A	T	C	G	T	A	A	A	T	A	A	A	A	T	T	G	0	0	P	M
SEN_TH_057.2008	2008	T	A	C	T	C	G	A	G	T	C	T	A	C	C	C	C	C	A	A	G	C	C	T	G	0	0	P	M
SEN_TH_065.2008	2008	T	A	T	T	G	C	A	G	A	T	T	G	T	A	C	A	T	T	A	G	A	T	T	G	0	0	P	M
SEN_TH_066.2008	2008	T	A	C	T	C	C	A	G	A	C	C	G	C	A	C	C	C	A	A	G	C	T	T	G	0	0	P	M
SEN_TH_067.2008	2008	C	A	C	C	C	C	G	G	A	C	T	A	C	A	A	C	C	T	A	G	C	C	T	G	0	0	P	M
SEN_TH_074.2008	2008	T	A	C	T	G	C	A	G	A	T	C	G	C	A	C	C	T	A	C	G	A	T	T	G	0	0	P	M
SEN_TH_077.2008	2008	T	A	T	C	C	C	A	G	T	C	T	G	C	C	C	A	T	T	A	G	C	C	T	G	0	0	P	M
SEN_TH_087.2008	2008	T	A	T	T	C	C	A	G	T	C	T	A	C	C	A	C	C	A	A	G	A	C	T	G	0	0	P	M
SEN_TH_096.2008	2008	T	A	T	T	G	C	A	G	A	C	T	G	T	C	C	A	C	A	A	G	A	T	T	G	0	0	P	M
SEN_TH_102.2008	2008	T	A	C	T	G	C	A	G	T	T	T	A	T	A	C	C	C	A	C	G	A	T	T	G	0	0	P	M
SEN_TH_115.2008	2008	T	A	C	T	C	C	A	G	A	C	T	A	C	C	A	A	T	A	A	G	C	C	T	G	0	0	P	M
SEN_TH_117.2008	2008	T	A	C	T	C	G	G	G	A	T	C	G	C	A	A	C	T	A	A	G	A	T	T	G	0	0	P	M
SEN_TH_121.2008	2008	C	A	C	T	C	G	G	G	T	C	T	A	C	C	A	C	C	A	A	G	C	T	T	G	0	0	P	M
SEN_TH_123.2008	2008	T	A	C	C	G	C	A	G	A	T	C	A	C	C	A	C	C	T	A	A	A	T	T	G	0	0	P	M
SEN_TH_128.2008	2008	T	A	C	T	C	C	G	G	T	T	T	A	C	A	C	C	T	T	A	G	C	T	T	G	0	0	P	M
SEN_TH_133.2008	2008	T	A	T	T	G	G	G	G	T	T	T	A	T	A	A	A	C	A	A	A	A	C	T	G	0	0	P	M
SEN_TH_136.2008	2008	C	A	T	T	C	C	A	G	T	C	C	A	C	A	A	C	T	A	C	G	C	C	T	G	0	0	P	M
SEN_TH_137.2008	2008	T	A	T	T	G	C	A	G	A	C	C	G	C	C	C	C	C	T	A	G	C	T	T	G	0	0	P	M
SEN_TH_139.2008	2008	T	A	C	T	C	G	A	G	T	T	C	G	T	A	C	A	T	T	A	G	A	T	T	G	0	0	P	M
SEN_TH_140.2008	2008	T	A	T	T	C	C	A	G	T	T	T	A	T	C	C	A	T	T	A	G	C	T	T	G	0	0	P	M
SEN_TH_144.2008	2008	T	A	C	T	C	G	G	A	A	C	C	G	C	A	A	C	C	T	C	G	C	T	T	G	0	0	P	M
SEN_TH_145.2008	2008	T	A	T	T	G	G	G	G	T	T	T	A	T	A	C	A	C	T	A	G	C	C	T	G	0	0	P	M
SEN_TH_150.2008	2008	T	A	T	T	G	C	A	G	T	C	T	A	C	C	A	C	C	A	A	G	C	C	T	G	0	0	P	M
SEN_TH_153.2008	2008	C	A	C	T	C	C	G	G	A	C	C	G	T	A	A	C	T	T	A	G	A	C	T	G	0	0	P	M
SEN_TH_156.2008	2008	T	A	T	C	C	C	A	G	T	T	T	A	T	C	C	C	T	A	A	G	C	T	T	G	0	0	P	M
SEN_TH_179.2008	2008	C	A	T	T	C	G	A	G	T	C	C	A	C	A	A	C	C	T	A	G	C	C	T	G	0	0	P	M
SEN_TH_180.2008	2008	C	A	T	T	C	C	A	G	T	C	C	A	C	C	A	A	T	A	A	G	A	T	T	G	0	0	P	M
SEN_TH_190.2008	2008	T	A	T	T	C	G	A	A	A	C	T	A	C	A	C	A	C	A	A	A	A	T	T	G	0	0	P	M
SEN_TH_210.2008	2008	T	A	C	T	C	C	A	G	A	C	C	G	T	A	C	C	T	T	A	G	C	T	T	G	0	0	P	M
SEN_TH_211.2008	2008	T	G	C	T	C	C	G	G	T	C	C	A	T	C	C	C	T	T	C	G	C	C	T	G	0	0	P	M
SEN_TH_222.2008	2008	T	A	T	T	C	C	A	G	A	C	T	A	C	A	A	C	T	T	A	A	C	T	T	G	0	0	P	M
SEN_TH_226.2008	2008	T	A	T	T	C	G	A	G	T	T	T	A	T	A	C	C	T	A	C	A	A	C	T	G	0	0	P	M
SEN_TH_231.2008	2008	T	A	T	T	G	C	A	G	T	C	T	A	C	A	A	C	T	A	A	G	C	C	T	G	0	0	P	M
SEN_TH_232.2008	2008	T	A	C	T	C	C	G	G	A	T	T	G	T	A	C	A	T	T	C	A	A	T	T	G	0	0	P	M
SEN_TH_233.2008	2008	T	A	C	T	C	G	A	G	T	C	T	A	C	C	A	C	C	T	C	G	A	C	T	G	0	0	P	M
SEN_TH_238.2008	2008	T	A	C	T	G	G	A	G	A	C	C	G	C	A	C	C	C	A	A	G	A	C	T	G	0	0	P	M
SEN_TH_242.2008	2008	T	A	C	T	C	C	A	G	A	T	C	A	C	A	C	C	T	T	A	G	A	C	T	G	0	0	P	M
SEN_TH_246.2008	2008	T	A	C	T	C	G	A	G	A	C	C	G	C	A	C	C	C	T	A	G	C	C	T	G	0	0	P	M
SEN_TH_251.2008	2008	T	A	C	T	C	C	A	G	A	C	T	G	C	A	C	C	T	T	C	G	A	T	T	G	0	0	P	M
SEN_TH_001.2009	2009	T	A	C	T	C	G	A	A	A	C	T	G	C	C	C	A	T	A	A	G	C	T	T	G	0	0	P	M
SEN_TH_028.2009	2009	T	A	C	T	C	G	A	A	A	C	T	G	C	C	C	A	T	A	A	G	C	T	T	G	0	0	P	M
SEN_TH_034.2009	2009	T	A	C	T	C	G	A	A	A	C	T	G	C	C	C	A	T	A	A	G	C	T	T	G	0	0	P	M
SEN_TH_138.2009	2009	T	A	C	T	C	G	A	A	A	C	T	G	C	C	C	A	T	A	A	G	C	T	T	G	0	0	P	M
SEN_TH_142.2009	2009	T	A	C	T	C	G	A	A	A	C	T	G	C	C	C	A	T	A	A	G	C	T	T	G	0	0	P	M
SEN_TH_032.2009	2009	C	A	T	T	C	C	A	G	T	C	C	G	C	C	A	A	T	A	A	G	A	T	T	G	0	0	P	M
SEN_TH_062.2009	2009	T	A	C	C	C	C	G	G	T	C	C	A	C	C	A	A	T	A	A	G	A	C	T	G	0	0	P	M
SEN_TH_106.2009	2009	T	A	C	C	C	C	G	G	T	C	C	A	C	C	A	A	T	A	A	G	A	C	T	G	0	0	P	M
SEN_TH_145.2009	2009	T	A	C	T	C	C	G	G	A	T	T	G	T	C	A	C	C	A	A	G	A	C	T	G	0	0	P	M
SEN_TH_150.2009	2009	T	A	C	T	C	C	G	G	A	T	T	G	T	C	A	C	C	A	A	G	A	C	T	G	0	0	P	M
SEN_TH_079.2009	2009	C	G	C	T	C	C	A	G	A	C	T	A	C	A	C	C	C	T	A	A	A	C	T	G	0	0	P	M
SEN_TH_133.2009	2009	C	G	C	T	C	C	A	G	A	C	T	A	C	A	C	C	C	T	A	A	A	C	T	G	0	0	P	M
SEN_TH_029.2009	2009	C	A	C	T	C	G	A	G	A	T	T	G	C	C	C	C	T	A	C	G	C	C	T	G	0	0	P	M
SEN_TH_132.2009	2009	C	A	C	T	C	G	A	G	A	T	T	G	C	C	C	C	T	A	C	G	C	C	T	G	0	0	P	M
SEN_TH_084.2009	2009	T	A	C	T	G	G	A	G	A	C	T	G	C	A	A	A	T	A	A	G	A	T	T	G	0	0	P	M
SEN_TH_085.2009	2009	T	A	C	T	G	G	A	G	A	C	T	G	C	A	A	A	T	A	A	G	A	T	T	G	0	0	P	M
SEN_TH_071.2009	2009	C	A	C	T	G	C	G	G	A	T	T	G	T	A	C	C	T	A	A	G	A	C	T	G	0	0	P	M
SEN_TH_119.2009	2009	C	A	C	T	G	C	G	G	A	T	T	G	T	A	C	C	T	A	A	G	A	C	T	G	0	0	P	M
SEN_TH_002.2009	2009	T	A	C	T	C	C	G	G	T	C	T	A	C	C	C	C	C	A	A	G	C	C	T	G	0	0	P	M
SEN_TH_007.2009	2009	T	A	C	T	G	C	A	G	T	T	C	G	T	A	A	A	C	T	C	G	A	T	T	G	0	0	P	M
SEN_TH_011.2009	2009	T	A	C	T	C	C	G	A	A	T	C	G	C	A	C	C	C	A	A	G	A	T	T	G	0	0	P	M
SEN_TH_013.2009	2009	T	A	C	T	C	C	A	G	A	C	T	A	T	A	C	A	C	T	C	G	A	C	T	G	0	0	P	M
SEN_TH_018.2009	2009	T	A	T	T	G	G	G	G	T	C	T	G	C	A	A	C	C	A	A	G	A	T	T	G	0	0	P	M
SEN_TH_021.2009	2009	T	A	T	T	C	C	A	G	A	T	T	G	C	A	C	C	C	A	A	G	C	C	T	G	0	0	P	M
SEN_TH_023.2009	2009	T	A	T	T	C	G	A	G	A	C	T	A	C	A	C	A	T	A	A	G	A	C	T	G	0	0	P	M
SEN_TH_033.2009	2009	T	A	C	T	C	C	A	G	A	T	C	G	C	A	C	C	T	A	A	G	A	T	T	G	0	0	P	M
SEN_TH_042.2009	2009	T	A	T	T	C	G	G	G	A	C	T	G	C	A	C	C	C	A	A	G	C	T	T	G	0	0	P	M
SEN_TH_045.2009	2009	T	A	C	T	C	G	A	G	A	T	C	G	T	A	C	C	T	A	C	G	A	T	T	G	0	0	P	M
SEN_TH_046.2009	2009	C	A	T	T	C	C	A	G	A	T	T	G	C	A	C	A	T	T	A	G	A	T	T	G	0	0	P	M
SEN_TH_047.2009	2009	T	G	C	T	C	C	G	G	T	T	T	A	T	A	C	C	C	T	A	G	A	C	T	G	0	0	P	M
SEN_TH_053.2009	2009	C	A	T	T	C	C	G	A	A	T	C	A	C	A	C	C	T	A	C	G	A	T	T	G	0	0	P	M
SEN_TH_067.2009	2009	T	A	C	T	C	C	A	G	A	T	T	A	C	A	C	C	C	A	C	G	C	T	T	G	0	0	P	M
SEN_TH_077.2009	2009	T	A	C	T	C	C	A	G	T	C	T	G	C	A	C	C	T	T	C	G	C	C	T	G	0	0	P	M
SEN_TH_087.2009	2009	T	A	C	T	C	C	A	A	A	T	T	A	C	A	C	C	C	T	A	G	C	C	T	G	0	0	P	M
SEN_TH_090.2009	2009	C	A	C	T	C	C	A	G	A	C	T	A	T	A	C	C	C	T	A	G	C	C	T	G	0	0	P	M
SEN_TH_092.2009	2009	C	A	C	T	C	C	G	G	T	T	T	G	C	A	A	C	C	A	C	G	C	C	T	G	0	0	P	M
SEN_TH_097.2009	2009	T	A	T	T	C	C	G	G	A	C	C	G	T	A	C	C	C	A	A	G	C	T	T	G	0	0	P	M
SEN_TH_101.2009	2009	T	A	C	T	C	G	A	G	A	C	T	A	C	C	A	C	T	A	A	A	C	C	T	G	0	0	P	M
SEN_TH_112.2009	2009	T	A	C	T	C	G	A	G	T	T	T	G	T	C	A	C	C	A	C	G	A	C	T	G	0	0	P	M
SEN_TH_113.2009	2009	T	A	C	T	C	C	G	G	A	T	T	G	C	A	C	C	C	T	A	G	A	T	T	G	0	0	P	M
SEN_TH_116.2009	2009	T	A	C	T	C	C	G	G	T	T	C	G	C	C	A	C	C	T	A	G	A	C	T	G	0	0	P	M
SEN_TH_117.2009	2009	T	A	T	T	C	C	G	G	A	C	T	A	T	A	C	A	C	A	C	G	A	C	T	G	0	0	P	M
SEN_TH_121.2009	2009	T	A	C	T	C	C	A	G	T	C	T	A	T	A	A	C	T	A	C	G	C	T	T	G	0	0	P	M
SEN_TH_123.2009	2009	T	A	T	C	G	C	A	G	A	T	T	G	T	A	C	C	C	A	C	G	C	T	T	G	0	0	P	M
SEN_TH_128.2009	2009	C	A	C	C	C	C	A	G	A	T	T	G	C	C	A	C	C	A	C	G	A	C	T	G	0	0	P	M
SEN_TH_130.2009	2009	C	A	C	T	C	C	A	G	T	C	C	G	T	A	A	C	T	A	A	A	C	C	T	G	0	0	P	M
SEN_TH_136.2009	2009	T	A	C	T	C	C	G	G	T	C	C	G	C	C	C	C	C	A	A	A	A	T	T	G	0	0	P	M
SEN_TH_139.2009	2009	T	A	C	C	G	C	G	G	A	T	C	A	T	A	C	A	C	A	A	G	A	C	T	G	0	0	P	M
SEN_TH_148.2009	2009	T	A	C	T	C	G	G	G	T	C	T	G	C	A	C	C	C	A	A	A	C	T	T	G	0	0	P	M
SEN_TH_149.2009	2009	C	A	C	T	C	G	A	G	T	T	T	A	T	A	C	C	C	T	A	G	C	T	T	G	0	0	P	M
SEN_TH_151.2009	2009	T	A	C	T	G	C	A	G	T	C	T	A	C	A	C	C	C	A	A	G	C	C	T	G	0	0	P	M
SEN_TH_156.2009	2009	T	A	C	T	C	C	A	G	T	T	C	G	C	A	C	C	T	T	C	G	A	C	T	G	0	0	P	M
SEN_TH_157.2009	2009	T	A	C	T	C	G	G	G	T	T	C	G	C	C	C	A	T	T	C	G	A	C	T	G	0	0	P	M
SEN_TH_161.2009	2009	C	A	C	T	C	C	A	G	A	T	T	A	T	A	C	C	T	A	C	G	A	C	T	G	0	0	P	M
SEN_TH_162.2009	2009	C	A	T	T	C	C	A	G	A	T	T	A	T	A	C	C	C	A	C	G	C	T	T	G	0	0	P	M
SEN_TH_163.2009	2009	T	A	T	T	C	C	G	G	A	T	T	A	C	A	A	C	T	A	C	G	C	C	T	G	0	0	P	M
SEN_TH_164.2009	2009	T	A	C	T	C	G	A	G	A	T	T	A	C	C	A	C	T	A	A	G	C	T	T	G	0	0	P	M
SEN_TH_165.2009	2009	T	A	C	T	C	G	G	G	A	C	T	A	T	A	A	C	C	T	C	A	A	T	T	G	0	0	P	M
SEN_TH_198.2010	2010	T	A	C	T	C	C	A	G	A	C	C	G	T	A	C	C	T	T	A	G	A	T	T	G	0	0	P	M
SEN_TH_004.2010	2010	T	A	C	T	C	G	A	A	A	C	T	G	C	C	C	A	T	A	A	G	C	T	T	G	0	0	P	M
SEN_TH_177.2010	2010	T	A	C	T	C	G	A	A	A	C	T	G	C	C	C	A	T	A	A	G	C	T	T	G	0	0	P	M
SEN_TH_060.2010	2010	C	A	T	T	C	C	A	G	T	C	C	G	C	C	A	A	T	A	A	G	A	T	T	G	0	0	P	M
SEN_TH_078.2010	2010	C	A	T	T	C	C	A	G	T	C	C	G	C	C	A	A	T	A	A	G	A	T	T	G	0	0	P	M
SEN_TH_058.2010	2010	C	A	C	T	C	C	G	G	A	T	T	G	C	C	A	C	T	A	A	G	A	T	T	G	0	0	P	M
SEN_TH_178.2010	2010	C	A	C	T	C	C	G	G	A	T	T	G	C	C	A	C	T	A	A	G	A	T	T	G	0	0	P	M
SEN_TH_038.2010	2010	T	A	C	C	C	C	G	G	T	C	C	A	C	A	C	C	T	T	A	A	C	T	T	G	0	0	P	M
SEN_TH_076.2010	2010	T	A	C	C	C	C	G	G	T	C	C	A	C	A	C	C	T	T	A	A	C	T	T	G	0	0	P	M
SEN_TH_179.2010	2010	T	A	C	C	C	C	G	G	T	C	C	A	C	A	C	C	T	T	A	A	C	T	T	G	0	0	P	M
SEN_TH_124.2010	2010	C	A	T	T	G	C	G	A	T	C	T	G	C	A	A	C	C	T	A	A	A	C	T	G	0	0	P	M
SEN_TH_048.2010	2010	T	A	C	T	C	G	A	G	A	T	C	A	T	A	C	A	T	A	C	A	C	T	T	G	0	0	P	M
SEN_TH_049.2010	2010	T	A	C	T	C	G	A	G	A	T	C	A	T	A	C	A	T	A	C	A	C	T	T	G	0	0	P	M
SEN_TH_050.2010	2010	T	A	C	T	C	G	A	G	A	T	C	A	T	A	C	A	T	A	C	A	C	T	T	G	0	0	P	M
SEN_TH_174.2010	2010	T	A	C	T	C	G	A	G	A	T	C	A	T	A	C	A	T	A	C	A	C	T	T	G	0	0	P	M
SEN_TH_069.2010	2010	C	A	C	T	G	C	G	A	T	C	T	G	C	A	A	C	C	T	A	A	A	C	T	G	0	0	P	M
SEN_TH_162.2010	2010	C	A	C	T	C	C	A	G	A	T	T	G	T	A	A	C	C	A	A	G	C	T	T	G	0	0	P	M
SEN_TH_023.2010	2010	T	A	C	T	C	C	G	G	T	T	C	G	T	A	A	A	C	T	C	G	C	C	T	G	0	0	P	M
SEN_TH_010.2010	2010	T	A	C	C	C	C	G	G	T	C	C	A	C	C	A	A	T	A	A	G	A	C	T	G	0	0	P	M
SEN_TH_012.2010	2010	T	A	C	C	C	C	G	G	T	C	C	A	C	C	A	A	T	A	A	G	A	C	T	G	0	0	P	M
SEN_TH_025.2010	2010	T	A	C	C	C	C	G	G	T	C	C	A	C	C	A	A	T	A	A	G	A	C	T	G	0	0	P	M
SEN_TH_125.2010	2010	T	A	C	C	C	C	G	G	T	C	C	A	C	C	A	A	T	A	A	G	A	C	T	G	0	0	P	M
SEN_TH_130.2010	2010	T	A	C	C	C	C	G	G	T	C	C	A	C	C	A	A	T	A	A	G	A	C	T	G	0	0	P	M
SEN_TH_152.2010	2010	T	A	C	C	C	C	G	G	T	C	C	A	C	C	A	A	T	A	A	G	A	C	T	G	0	0	P	M
SEN_TH_156.2010	2010	T	A	C	C	C	C	G	G	T	C	C	A	C	C	A	A	T	A	A	G	A	C	T	G	0	0	P	M
SEN_TH_166.2010	2010	T	A	C	C	C	C	G	G	T	C	C	A	C	C	A	A	T	A	A	G	A	C	T	G	0	0	P	M
SEN_TH_199.2010	2010	T	A	C	C	C	C	G	G	T	C	C	A	C	C	A	A	T	A	A	G	A	C	T	G	0	0	P	M
SEN_TH_210.2010	2010	T	A	C	C	C	C	G	G	T	C	C	A	C	C	A	A	T	A	A	G	A	C	T	G	0	0	P	M
SEN_TH_001.2010	2010	T	A	C	T	C	C	G	G	T	T	T	A	T	A	C	C	T	T	A	G	A	C	T	G	0	0	P	M
SEN_TH_002.2010	2010	T	A	C	T	C	C	G	G	T	T	T	A	T	A	C	C	T	T	A	G	A	C	T	G	0	0	P	M
SEN_TH_079.2010	2010	T	A	C	C	G	G	A	G	T	C	C	A	C	C	A	A	T	T	A	G	A	C	T	G	0	0	P	M
SEN_TH_211.2010	2010	T	A	C	C	G	G	A	G	T	C	C	A	C	C	A	A	T	T	A	G	A	C	T	G	0	0	P	M
SEN_TH_006.2010	2010	T	A	C	C	G	G	A	G	T	C	C	G	T	A	C	C	T	A	A	G	C	C	T	G	0	0	P	M
SEN_TH_132.2010	2010	T	A	C	C	G	G	A	G	T	C	C	G	T	A	C	C	T	A	A	G	C	C	T	G	0	0	P	M
SEN_TH_026.2010	2010	T	A	C	T	C	C	A	G	A	C	C	G	C	C	C	C	T	A	A	A	A	T	T	G	0	0	P	M
SEN_TH_180.2010	2010	T	A	C	T	C	C	A	G	A	C	C	G	C	C	C	C	T	A	A	A	A	T	T	G	0	0	P	M
SEN_TH_007.2010	2010	C	A	C	T	C	C	A	A	A	T	C	G	T	A	C	C	T	T	A	G	A	T	T	G	0	0	P	M
SEN_TH_015.2010	2010	C	A	C	T	C	C	A	A	A	T	C	G	T	A	C	C	T	T	A	G	A	T	T	G	0	0	P	M
SEN_TH_107.2010	2010	C	A	C	T	C	C	A	A	A	T	C	G	T	A	C	C	T	T	A	G	A	T	T	G	0	0	P	M
SEN_TH_123.2010	2010	C	A	C	T	C	C	A	A	A	T	C	G	T	A	C	C	T	T	A	G	A	T	T	G	0	0	P	M
SEN_TH_127.2010	2010	C	A	C	T	C	C	A	A	A	T	C	G	T	A	C	C	T	T	A	G	A	T	T	G	0	0	P	M
SEN_TH_135.2010	2010	C	A	C	T	C	C	A	A	A	T	C	G	T	A	C	C	T	T	A	G	A	T	T	G	0	0	P	M
SEN_TH_065.2010	2010	T	G	T	T	C	C	A	G	T	T	T	A	T	C	A	C	C	A	C	G	C	C	T	G	0	0	P	M
SEN_TH_073.2010	2010	T	G	T	T	C	C	A	G	T	T	T	A	T	C	A	C	C	A	C	G	C	C	T	G	0	0	P	M
SEN_TH_075.2010	2010	T	G	T	T	C	C	A	G	T	T	T	A	T	C	A	C	C	A	C	G	C	C	T	G	0	0	P	M
SEN_TH_118.2010	2010	T	G	T	T	C	C	A	G	T	T	T	A	T	C	A	C	C	A	C	G	C	C	T	G	0	0	P	M
SEN_TH_126.2010	2010	T	G	T	T	C	C	A	G	T	T	T	A	T	C	A	C	C	A	C	G	C	C	T	G	0	0	P	M
SEN_TH_143.2010	2010	T	G	T	T	C	C	A	G	T	T	T	A	T	C	A	C	C	A	C	G	C	C	T	G	0	0	P	M
SEN_TH_154.2010	2010	T	G	T	T	C	C	A	G	T	T	T	A	T	C	A	C	C	A	C	G	C	C	T	G	0	0	P	M
SEN_TH_187.2010	2010	T	G	T	T	C	C	A	G	T	T	T	A	T	C	A	C	C	A	C	G	C	C	T	G	0	0	P	M
SEN_TH_005.2010	2010	T	A	C	T	C	C	A	G	T	C	T	A	C	A	C	C	T	T	C	G	C	T	T	G	0	0	P	M
SEN_TH_008.2010	2010	T	G	C	T	C	G	G	G	A	T	C	A	T	C	A	C	C	A	A	G	A	T	T	G	0	0	P	M
SEN_TH_009.2010	2010	T	A	C	T	C	G	G	G	A	C	C	A	C	A	A	C	C	T	A	G	C	T	T	G	0	0	P	M
SEN_TH_016.2010	2010	T	A	C	T	C	G	G	G	A	T	C	A	T	A	A	C	T	A	A	G	A	C	T	G	0	0	P	M
SEN_TH_031.2010	2010	T	A	C	C	C	G	A	G	A	T	T	G	T	A	C	C	T	T	C	G	C	T	T	G	0	0	P	M
SEN_TH_044.2010	2010	T	A	C	C	C	C	G	G	T	C	C	A	C	A	C	C	C	T	A	A	C	T	T	G	0	0	P	M
SEN_TH_045.2010	2010	T	A	T	C	C	C	G	G	T	C	C	A	C	A	C	C	T	T	A	A	C	T	T	G	0	0	P	M
SEN_TH_061.2010	2010	T	A	C	T	C	G	A	G	A	T	T	A	T	A	C	A	T	A	C	A	C	T	T	G	0	0	P	M
SEN_TH_064.2010	2010	T	A	C	T	G	G	G	G	A	T	T	A	C	C	C	C	C	T	C	A	A	C	T	G	0	0	P	M
SEN_TH_066.2010	2010	T	A	C	T	C	C	A	A	A	C	T	G	C	A	C	C	T	T	A	G	C	C	T	G	0	0	P	M
SEN_TH_080.2010	2010	T	A	T	T	C	C	G	G	T	T	T	A	T	A	A	C	C	A	A	G	A	C	T	G	0	0	P	M
SEN_TH_081.2010	2010	C	A	C	T	C	G	A	G	A	T	T	G	C	A	A	C	T	A	C	G	C	C	T	G	0	0	P	M
SEN_TH_090.2010	2010	T	A	C	T	C	G	A	A	A	C	T	A	C	C	C	A	T	A	A	G	C	T	T	G	0	0	P	M
SEN_TH_104.2010	2010	T	A	C	T	C	G	A	G	A	C	T	G	C	C	C	A	T	A	C	A	C	T	T	G	0	0	P	M
SEN_TH_112.2010	2010	T	A	C	T	C	G	G	A	T	C	C	G	C	C	C	C	T	A	A	G	A	C	T	G	0	0	P	M
SEN_TH_133.2010	2010	T	A	C	T	C	C	G	G	T	C	C	A	C	C	C	C	C	T	C	G	A	T	T	G	0	0	P	M
SEN_TH_140.2010	2010	T	A	C	T	G	C	A	G	T	T	T	A	T	A	A	C	T	T	C	G	A	T	T	G	0	0	P	M
SEN_TH_153.2010	2010	T	A	T	T	C	C	A	G	A	C	T	A	C	C	C	A	C	T	A	A	A	C	T	G	0	0	P	M
SEN_TH_155.2010	2010	C	G	T	T	C	C	A	G	T	T	T	A	T	C	A	C	C	A	C	G	C	C	T	G	0	0	P	M
SEN_TH_157.2010	2010	T	A	T	T	C	C	A	G	A	T	C	G	C	A	C	C	C	A	A	G	A	T	T	G	0	0	P	M
SEN_TH_160.2010	2010	T	A	C	T	C	C	A	G	T	T	T	A	T	A	C	C	T	T	C	G	C	T	T	G	0	0	P	M
SEN_TH_161.2010	2010	T	A	C	C	G	C	G	G	A	C	T	G	T	A	C	C	C	T	A	A	A	C	T	G	0	0	P	M
SEN_TH_170.2010	2010	T	A	C	T	C	C	G	G	A	T	C	A	T	A	C	A	T	A	C	G	A	T	T	G	0	0	P	M
SEN_TH_181.2010	2010	T	A	T	C	C	G	A	G	A	C	C	G	T	A	C	C	C	A	A	G	A	C	T	G	0	0	P	M
SEN_TH_188.2010	2010	C	A	C	T	C	C	G	G	A	C	T	G	T	A	C	C	T	A	C	A	C	T	T	G	0	0	P	M
SEN_TH_196.2010	2010	T	G	C	T	C	G	A	G	T	T	T	G	T	C	A	A	C	T	C	G	C	C	T	G	0	0	P	M
SEN_TH_142.2011	2011	T	A	C	T	C	G	A	A	A	C	T	G	C	C	C	A	T	A	A	G	C	T	T	G	0	0	P	M
SEN_TH_113.2011	2011	C	A	T	T	C	C	A	G	T	C	C	G	C	C	A	A	T	A	A	G	A	T	T	G	0	0	P	M
SEN_TH_126.2011	2011	C	A	T	T	C	C	A	G	T	C	C	G	C	C	A	A	T	A	A	G	A	T	T	G	0	0	P	M
SEN_TH_133.2011	2011	C	A	T	T	C	C	A	G	T	C	C	G	C	C	A	A	T	A	A	G	A	T	T	G	0	0	P	M
SEN_TH_141.2011	2011	C	A	T	T	C	C	A	G	T	C	C	G	C	C	A	A	T	A	A	G	A	T	T	G	0	0	P	M
SEN_TH_040.2011	2011	C	A	C	T	C	C	G	G	A	T	T	G	C	C	A	C	T	A	A	G	A	T	T	G	0	0	P	M
SEN_TH_011.2011	2011	T	A	C	C	C	C	G	G	T	C	C	A	C	A	C	C	T	T	A	A	C	T	T	G	0	0	P	M
SEN_TH_073.2011	2011	T	A	C	C	C	C	G	G	T	C	C	A	C	A	C	C	T	T	A	A	C	T	T	G	0	0	P	M
SEN_TH_027.2011	2011	C	A	T	T	G	C	G	A	T	C	T	G	C	A	A	C	C	T	A	A	A	C	T	G	0	0	P	M
SEN_TH_028.2011	2011	C	A	T	T	G	C	G	A	T	C	T	G	C	A	A	C	C	T	A	A	A	C	T	G	0	0	P	M
SEN_TH_116.2011	2011	C	A	T	T	G	C	G	A	T	C	T	G	C	A	A	C	C	T	A	A	A	C	T	G	0	0	P	M
SEN_TH_065.2011	2011	T	A	C	T	C	G	A	G	A	T	C	A	T	A	C	A	T	A	C	A	C	T	T	G	0	0	P	M
SEN_TH_007.2011	2011	C	A	C	T	G	C	G	A	T	C	T	G	C	A	A	C	C	T	A	A	A	C	T	G	0	0	P	M
SEN_TH_010.2011	2011	C	A	C	T	G	C	G	A	T	C	T	G	C	A	A	C	C	T	A	A	A	C	T	G	0	0	P	M
SEN_TH_061.2011	2011	C	A	C	T	G	C	G	A	T	C	T	G	C	A	A	C	C	T	A	A	A	C	T	G	0	0	P	M
SEN_TH_099.2011	2011	T	A	C	T	C	C	A	G	A	T	T	A	C	A	A	C	C	T	A	G	C	C	T	G	0	0	P	M
SEN_TH_021.2011	2011	T	A	C	C	C	C	G	G	T	C	C	A	C	C	A	A	T	A	A	G	A	T	T	G	0	0	P	M
SEN_TH_032.2011	2011	T	A	C	C	C	C	G	G	T	C	C	A	C	C	A	A	T	A	A	G	A	T	T	G	0	0	P	M
SEN_TH_063.2011	2011	T	A	C	C	C	C	G	G	T	C	C	A	C	C	A	A	T	A	A	G	A	T	T	G	0	0	P	M
SEN_TH_087.2011	2011	T	A	C	C	C	C	G	G	T	C	C	A	C	C	A	A	T	A	A	G	A	T	T	G	0	0	P	M
SEN_TH_047.2011	2011	T	A	T	T	C	C	A	G	T	C	C	A	C	C	C	A	T	A	A	G	A	C	T	G	0	0	P	M
SEN_TH_048.2011	2011	T	A	T	T	C	C	A	G	T	C	C	A	C	C	C	A	T	A	A	G	A	C	T	G	0	0	P	M
SEN_TH_050.2011	2011	T	A	T	T	C	C	A	G	T	C	C	A	C	C	C	A	T	A	A	G	A	C	T	G	0	0	P	M
SEN_TH_096.2011	2011	T	A	T	T	C	C	A	G	T	C	C	A	C	C	C	A	T	A	A	G	A	C	T	G	0	0	P	M
SEN_TH_124.2011	2011	T	A	T	T	C	C	A	G	T	C	C	A	C	C	C	A	T	A	A	G	A	C	T	G	0	0	P	M
SEN_TH_137.2011	2011	T	A	T	T	C	C	A	G	T	C	C	A	C	C	C	A	T	A	A	G	A	C	T	G	0	0	P	M
SEN_TH_121.2011	2011	T	A	T	T	C	G	A	G	T	C	T	A	C	A	C	C	T	T	C	A	C	T	T	G	0	0	P	M
SEN_TH_140.2011	2011	T	A	T	T	C	G	A	G	T	C	T	A	C	A	C	C	T	T	C	A	C	T	T	G	0	0	P	M
SEN_TH_091.2011	2011	T	G	C	T	C	C	A	A	T	T	T	A	T	C	C	A	T	A	C	G	C	T	T	G	0	0	P	M
SEN_TH_005.2011	2011	T	A	C	C	C	C	G	G	T	C	C	A	C	C	A	A	T	A	A	G	A	C	T	G	0	0	P	M
SEN_TH_014.2011	2011	T	A	C	C	C	C	G	G	T	C	C	A	C	C	A	A	T	A	A	G	A	C	T	G	0	0	P	M
SEN_TH_018.2011	2011	T	A	C	C	C	C	G	G	T	C	C	A	C	C	A	A	T	A	A	G	A	C	T	G	0	0	P	M
SEN_TH_019.2011	2011	T	A	C	C	C	C	G	G	T	C	C	A	C	C	A	A	T	A	A	G	A	C	T	G	0	0	P	M
SEN_TH_026.2011	2011	T	A	C	C	C	C	G	G	T	C	C	A	C	C	A	A	T	A	A	G	A	C	T	G	0	0	P	M
SEN_TH_031.2011	2011	T	A	C	C	C	C	G	G	T	C	C	A	C	C	A	A	T	A	A	G	A	C	T	G	0	0	P	M
SEN_TH_054.2011	2011	T	A	C	C	C	C	G	G	T	C	C	A	C	C	A	A	T	A	A	G	A	C	T	G	0	0	P	M
SEN_TH_064.2011	2011	T	A	C	C	C	C	G	G	T	C	C	A	C	C	A	A	T	A	A	G	A	C	T	G	0	0	P	M
SEN_TH_078.2011	2011	T	A	C	C	C	C	G	G	T	C	C	A	C	C	A	A	T	A	A	G	A	C	T	G	0	0	P	M
SEN_TH_095.2011	2011	T	A	C	C	C	C	G	G	T	C	C	A	C	C	A	A	T	A	A	G	A	C	T	G	0	0	P	M
SEN_TH_098.2011	2011	T	A	C	C	C	C	G	G	T	C	C	A	C	C	A	A	T	A	A	G	A	C	T	G	0	0	P	M
SEN_TH_101.2011	2011	T	A	C	C	C	C	G	G	T	C	C	A	C	C	A	A	T	A	A	G	A	C	T	G	0	0	P	M
SEN_TH_103.2011	2011	T	A	C	C	C	C	G	G	T	C	C	A	C	C	A	A	T	A	A	G	A	C	T	G	0	0	P	M
SEN_TH_104.2011	2011	T	A	C	C	C	C	G	G	T	C	C	A	C	C	A	A	T	A	A	G	A	C	T	G	0	0	P	M
SEN_TH_105.2011	2011	T	A	C	C	C	C	G	G	T	C	C	A	C	C	A	A	T	A	A	G	A	C	T	G	0	0	P	M
SEN_TH_106.2011	2011	T	A	C	C	C	C	G	G	T	C	C	A	C	C	A	A	T	A	A	G	A	C	T	G	0	0	P	M
SEN_TH_110.2011	2011	T	A	C	C	C	C	G	G	T	C	C	A	C	C	A	A	T	A	A	G	A	C	T	G	0	0	P	M
SEN_TH_111.2011	2011	T	A	C	C	C	C	G	G	T	C	C	A	C	C	A	A	T	A	A	G	A	C	T	G	0	0	P	M
SEN_TH_117.2011	2011	T	A	C	C	C	C	G	G	T	C	C	A	C	C	A	A	T	A	A	G	A	C	T	G	0	0	P	M
SEN_TH_122.2011	2011	T	A	C	C	C	C	G	G	T	C	C	A	C	C	A	A	T	A	A	G	A	C	T	G	0	0	P	M
SEN_TH_123.2011	2011	T	A	C	C	C	C	G	G	T	C	C	A	C	C	A	A	T	A	A	G	A	C	T	G	0	0	P	M
SEN_TH_127.2011	2011	T	A	C	C	C	C	G	G	T	C	C	A	C	C	A	A	T	A	A	G	A	C	T	G	0	0	P	M
SEN_TH_132.2011	2011	T	A	C	C	C	C	G	G	T	C	C	A	C	C	A	A	T	A	A	G	A	C	T	G	0	0	P	M
SEN_TH_134.2011	2011	T	A	C	C	C	C	G	G	T	C	C	A	C	C	A	A	T	A	A	G	A	C	T	G	0	0	P	M
SEN_TH_135.2011	2011	T	A	C	C	C	C	G	G	T	C	C	A	C	C	A	A	T	A	A	G	A	C	T	G	0	0	P	M
SEN_TH_136.2011	2011	T	A	C	C	C	C	G	G	T	C	C	A	C	C	A	A	T	A	A	G	A	C	T	G	0	0	P	M
SEN_TH_145.2011	2011	T	A	C	C	C	C	G	G	T	C	C	A	C	C	A	A	T	A	A	G	A	C	T	G	0	0	P	M
SEN_TH_146.2011	2011	T	A	C	C	C	C	G	G	T	C	C	A	C	C	A	A	T	A	A	G	A	C	T	G	0	0	P	M
SEN_TH_068.2011	2011	C	A	C	T	C	C	G	G	A	T	T	G	C	C	A	C	T	T	A	G	A	T	T	G	0	0	P	M
SEN_TH_069.2011	2011	C	A	C	T	C	C	G	G	A	T	T	G	C	C	A	C	T	T	A	G	A	T	T	G	0	0	P	M
SEN_TH_053.2011	2011	T	A	C	C	C	C	G	G	A	C	C	A	C	C	A	A	T	A	A	G	A	C	T	G	0	0	P	M
SEN_TH_062.2011	2011	T	A	C	C	C	C	G	G	A	C	C	A	C	C	A	A	T	A	A	G	A	C	T	G	0	0	P	M
SEN_TH_055.2011	2011	T	A	C	T	G	G	G	A	T	C	C	G	C	A	C	C	T	A	A	G	A	C	T	G	0	0	P	M
SEN_TH_109.2011	2011	T	A	C	T	G	G	G	A	T	C	C	G	C	A	C	C	T	A	A	G	A	C	T	G	0	0	P	M
SEN_TH_003.2011	2011	T	A	C	T	G	C	G	G	T	T	T	A	T	C	C	C	T	A	C	G	C	T	T	G	0	0	P	M
SEN_TH_015.2011	2011	C	A	T	T	C	C	A	G	T	C	C	G	C	C	A	A	T	A	A	G	C	T	T	G	0	0	P	M
SEN_TH_020.2011	2011	T	A	T	T	C	C	G	G	A	C	T	G	T	A	C	C	T	A	A	G	A	C	T	G	0	0	P	M
SEN_TH_030.2011	2011	T	A	C	T	C	G	G	G	T	T	T	G	C	A	C	A	T	A	A	G	C	C	T	G	0	0	P	M
SEN_TH_045.2011	2011	C	A	C	T	C	G	A	G	T	C	C	G	T	A	C	C	T	A	A	G	A	T	T	G	0	0	P	M
SEN_TH_046.2011	2011	T	A	C	T	C	C	G	G	T	C	C	A	C	A	C	C	T	T	A	A	C	T	T	G	0	0	P	M
SEN_TH_052.2011	2011	T	A	C	C	C	C	G	G	A	C	C	A	C	C	A	A	T	A	A	G	A	T	T	G	0	0	P	M
SEN_TH_067.2011	2011	T	A	C	T	C	C	A	A	T	T	T	A	C	A	A	C	T	T	C	G	A	T	T	G	0	0	P	M
SEN_TH_070.2011	2011	C	A	C	T	C	G	A	G	A	T	C	A	C	A	C	C	T	A	A	A	C	C	T	G	0	0	P	M
SEN_TH_072.2011	2011	T	A	C	C	C	C	G	A	T	C	C	A	C	C	A	A	T	A	A	G	A	C	T	G	0	0	P	M
SEN_TH_074.2011	2011	T	A	C	T	G	G	A	G	A	T	C	G	T	A	A	C	C	T	C	G	C	T	T	G	0	0	P	M
SEN_TH_075.2011	2011	C	A	C	T	G	G	A	A	A	C	T	G	C	C	C	A	T	A	A	G	C	T	T	G	0	0	P	M
SEN_TH_077.2011	2011	T	A	C	T	C	C	G	G	A	T	T	G	C	C	A	C	C	A	A	G	A	T	T	G	0	0	P	M
SEN_TH_081.2011	2011	T	A	C	T	C	C	G	A	A	T	C	G	C	A	C	A	C	A	C	G	C	T	T	G	0	0	P	M
SEN_TH_083.2011	2011	T	A	C	C	C	C	G	G	T	C	C	A	C	A	C	C	T	A	A	G	C	T	T	G	0	0	P	M
SEN_TH_084.2011	2011	C	A	T	T	C	C	A	G	A	T	T	G	C	C	A	A	C	T	C	G	C	C	T	G	0	0	P	M
SEN_TH_085.2011	2011	T	A	T	C	C	G	A	G	A	T	C	G	C	A	C	C	C	T	A	A	C	T	T	G	0	0	P	M
SEN_TH_092.2011	2011	T	A	T	C	C	G	A	G	A	T	C	G	C	A	C	C	T	T	A	A	A	T	T	G	0	0	P	M
SEN_TH_112.2011	2011	T	A	C	T	C	C	G	G	A	C	T	A	C	A	A	C	C	T	C	G	C	T	T	G	0	0	P	M
SEN_TH_120.2011	2011	T	A	C	C	C	C	G	G	A	C	C	A	C	C	A	A	T	A	C	A	A	T	T	G	0	0	P	M
SEN_TH_125.2011	2011	T	A	C	T	C	G	G	G	A	T	C	G	T	A	C	C	T	A	A	G	A	C	T	G	0	0	P	M
SEN_TH_129.2011	2011	C	A	C	T	C	G	A	G	A	C	T	A	C	C	A	C	T	A	C	A	C	C	T	G	0	0	P	M
SEN_TH_130.2011	2011	C	A	C	T	G	C	G	G	T	C	T	A	C	A	C	C	C	T	C	G	A	T	T	G	0	0	P	M
SEN_TH_138.2011	2011	C	A	T	T	C	C	A	G	A	C	C	G	C	C	A	C	T	A	A	G	A	T	T	G	0	0	P	M
SEN_TH_139.2011	2011	T	A	T	C	G	G	A	G	T	C	T	G	T	A	C	A	C	T	A	G	A	T	T	G	0	0	P	M
SEN_TH_144.2011	2011	T	A	T	C	C	C	A	G	T	T	T	G	T	A	C	C	T	A	C	G	A	T	T	G	0	0	P	M
SEN_TH_147.2011	2011	T	A	C	T	C	G	G	A	A	T	C	G	C	A	C	A	C	A	A	A	A	C	T	G	0	0	P	M
SEN_TH_148.2011	2011	T	A	C	C	G	C	A	G	T	C	C	G	T	A	C	C	T	T	A	G	A	C	T	G	0	0	P	M
SEN_TH_055.2012	2012	C	A	C	T	G	C	G	A	T	C	T	G	C	A	A	C	C	T	A	A	A	C	T	G	0	0	P	M
SEN_TH_222.2012	2012	C	A	C	T	G	C	G	A	T	C	T	G	C	A	A	C	C	T	A	A	A	C	T	G	0	0	P	M
SEN_TH_038.2012	2012	T	A	C	T	C	C	A	G	A	T	T	A	C	A	A	C	C	T	A	G	C	C	T	G	0	0	P	M
SEN_TH_043.2012	2012	T	A	C	T	C	C	A	G	A	T	T	A	C	A	A	C	C	T	A	G	C	C	T	G	0	0	P	M
SEN_TH_061.2012	2012	T	A	C	T	C	C	A	G	A	T	T	A	C	A	A	C	C	T	A	G	C	C	T	G	0	0	P	M
SEN_TH_098.2012	2012	T	A	C	T	C	C	A	G	A	T	T	A	C	A	A	C	C	T	A	G	C	C	T	G	0	0	P	M
SEN_TH_123.2012	2012	T	A	C	T	C	C	A	G	A	T	T	A	C	A	A	C	C	T	A	G	C	C	T	G	0	0	P	M
SEN_TH_160.2012	2012	T	A	C	T	C	C	A	G	A	T	T	A	C	A	A	C	C	T	A	G	C	C	T	G	0	0	P	M
SEN_TH_271.2012	2012	T	A	C	T	C	C	A	G	A	T	T	A	C	A	A	C	C	T	A	G	C	C	T	G	0	0	P	M
SEN_TH_274.2012	2012	T	A	C	T	C	C	A	G	A	T	T	A	C	A	A	C	C	T	A	G	C	C	T	G	0	0	P	M
SEN_TH_008.2012	2012	T	A	C	C	C	C	G	G	T	C	C	A	C	C	A	A	T	A	A	G	A	T	T	G	0	0	P	M
SEN_TH_009.2012	2012	T	A	C	C	C	C	G	G	T	C	C	A	C	C	A	A	T	A	A	G	A	T	T	G	0	0	P	M
SEN_TH_099.2012	2012	T	A	C	C	C	C	G	G	T	C	C	A	C	C	A	A	T	A	A	G	A	T	T	G	0	0	P	M
SEN_TH_095.2012	2012	T	A	T	T	C	C	A	G	T	C	C	A	C	C	C	A	T	A	A	G	A	C	T	G	0	0	P	M
SEN_TH_096.2012	2012	T	A	T	T	C	C	A	G	T	C	C	A	C	C	C	A	T	A	A	G	A	C	T	G	0	0	P	M
SEN_TH_157.2012	2012	T	A	T	T	C	C	A	G	T	C	C	A	C	C	C	A	T	A	A	G	A	C	T	G	0	0	P	M
SEN_TH_175.2012	2012	T	A	T	T	C	G	A	G	T	C	T	A	C	A	C	C	T	T	C	A	C	T	T	G	0	0	P	M
SEN_TH_106.2012	2012	T	A	C	C	C	C	G	G	T	C	C	A	C	C	A	C	T	A	A	A	A	T	T	G	0	0	P	M
SEN_TH_221.2012	2012	T	A	C	C	C	C	G	G	T	C	C	A	C	C	A	C	T	A	A	A	A	T	T	G	0	0	P	M
SEN_TH_264.2012	2012	T	A	C	C	C	C	G	G	T	C	C	A	C	C	A	C	T	A	A	A	A	T	T	G	0	0	P	M
SEN_TH_018.2012	2012	T	A	C	T	C	C	G	G	A	T	C	G	C	A	C	C	C	T	A	G	A	T	T	G	0	0	P	M
SEN_TH_265.2012	2012	T	A	C	T	C	C	G	G	A	T	C	G	C	A	C	C	C	T	A	G	A	T	T	G	0	0	P	M
SEN_TH_158.2012	2012	C	A	C	C	C	G	A	G	T	C	C	A	C	C	A	A	C	A	A	G	A	C	T	G	0	0	P	M
SEN_TH_211.2012	2012	C	A	C	C	C	G	A	G	T	C	C	A	C	C	A	A	C	A	A	G	A	C	T	G	0	0	P	M
SEN_TH_108.2012	2012	T	A	C	T	G	G	A	G	T	T	T	A	T	A	C	C	T	T	A	G	A	C	T	G	0	0	P	M
SEN_TH_161.2012	2012	C	A	C	T	C	C	A	G	T	C	C	G	T	C	A	C	C	A	A	G	A	T	T	G	0	0	P	M
SEN_TH_166.2012	2012	C	A	C	T	C	C	A	G	T	C	C	G	T	C	A	C	C	A	A	G	A	T	T	G	0	0	P	M
SEN_TH_202.2012	2012	C	A	C	T	C	C	A	G	T	C	C	G	T	C	A	C	C	A	A	G	A	T	T	G	0	0	P	M
SEN_TH_203.2012	2012	C	A	C	T	C	C	A	G	T	C	C	G	T	C	A	C	C	A	A	G	A	T	T	G	0	0	P	M
SEN_TH_226.2012	2012	C	A	C	T	C	C	A	G	T	C	C	G	T	C	A	C	C	A	A	G	A	T	T	G	0	0	P	M
SEN_TH_268.2012	2012	C	A	C	T	C	C	A	G	T	C	C	G	T	C	A	C	C	A	A	G	A	T	T	G	0	0	P	M
SEN_TH_021.2012	2012	T	A	C	T	C	C	G	G	A	T	T	A	C	A	A	A	T	A	A	G	C	C	T	G	0	0	P	M
SEN_TH_025.2012	2012	T	A	C	C	C	C	G	G	T	C	C	A	C	C	A	A	T	A	A	G	A	C	T	G	0	0	P	M
SEN_TH_035.2012	2012	T	A	C	C	C	C	G	G	T	C	C	A	C	C	A	A	T	A	A	G	A	C	T	G	0	0	P	M
SEN_TH_054.2012	2012	T	A	C	C	C	C	G	G	T	C	C	A	C	C	A	A	T	A	A	G	A	C	T	G	0	0	P	M
SEN_TH_071.2012	2012	T	A	C	C	C	C	G	G	T	C	C	A	C	C	A	A	T	A	A	G	A	C	T	G	0	0	P	M
SEN_TH_114.2012	2012	T	A	C	C	C	C	G	G	T	C	C	A	C	C	A	A	T	A	A	G	A	C	T	G	0	0	P	M
SEN_TH_142.2012	2012	T	A	C	C	C	C	G	G	T	C	C	A	C	C	A	A	T	A	A	G	A	C	T	G	0	0	P	M
SEN_TH_150.2012	2012	T	A	C	C	C	C	G	G	T	C	C	A	C	C	A	A	T	A	A	G	A	C	T	G	0	0	P	M
SEN_TH_162.2012	2012	T	A	C	C	C	C	G	G	T	C	C	A	C	C	A	A	T	A	A	G	A	C	T	G	0	0	P	M
SEN_TH_170.2012	2012	T	A	C	C	C	C	G	G	T	C	C	A	C	C	A	A	T	A	A	G	A	C	T	G	0	0	P	M
SEN_TH_182.2012	2012	T	A	C	C	C	C	G	G	T	C	C	A	C	C	A	A	T	A	A	G	A	C	T	G	0	0	P	M
SEN_TH_196.2012	2012	T	A	C	C	C	C	G	G	T	C	C	A	C	C	A	A	T	A	A	G	A	C	T	G	0	0	P	M
SEN_TH_214.2012	2012	T	A	C	C	C	C	G	G	T	C	C	A	C	C	A	A	T	A	A	G	A	C	T	G	0	0	P	M
SEN_TH_230.2012	2012	T	A	C	C	C	C	G	G	T	C	C	A	C	C	A	A	T	A	A	G	A	C	T	G	0	0	P	M
SEN_TH_258.2012	2012	T	A	C	C	C	C	G	G	T	C	C	A	C	C	A	A	T	A	A	G	A	C	T	G	0	0	P	M
SEN_TH_285.2012	2012	T	A	C	C	C	C	G	G	T	C	C	A	C	C	A	A	T	A	A	G	A	C	T	G	0	0	P	M
SEN_TH_287.2012	2012	T	A	C	C	C	C	G	G	T	C	C	A	C	C	A	A	T	A	A	G	A	C	T	G	0	0	P	M
SEN_TH_086.2012	2012	T	A	C	T	G	G	A	G	T	C	C	G	T	A	C	C	T	T	A	G	C	T	T	G	0	0	P	M
SEN_TH_164.2012	2012	T	A	C	T	G	G	A	G	T	C	C	G	T	A	C	C	T	T	A	G	C	T	T	G	0	0	P	M
SEN_TH_273.2012	2012	T	A	C	T	C	C	G	G	T	T	C	G	T	C	C	C	C	T	A	G	A	T	T	G	0	0	P	M
SEN_TH_286.2012	2012	T	A	C	T	C	C	G	G	T	T	C	G	T	C	C	C	C	T	A	G	A	T	T	G	0	0	P	M
SEN_TH_288.2012	2012	T	A	C	T	C	C	G	G	T	T	C	G	T	C	C	C	C	T	A	G	A	T	T	G	0	0	P	M
SEN_TH_075.2012	2012	T	A	T	T	G	G	G	G	A	T	C	G	C	A	A	C	C	A	A	G	A	T	T	G	0	0	P	M
SEN_TH_152.2012	2012	T	A	T	T	G	G	G	G	A	T	C	G	C	A	A	C	C	A	A	G	A	T	T	G	0	0	P	M
SEN_TH_022.2012	2012	T	A	C	T	C	C	A	G	A	C	T	A	T	C	C	A	T	T	C	G	A	T	T	G	0	0	P	M
SEN_TH_032.2012	2012	T	A	C	T	C	C	A	G	A	C	T	A	T	C	C	A	T	T	C	G	A	T	T	G	0	0	P	M
SEN_TH_102.2012	2012	T	A	C	T	C	C	A	G	A	T	C	G	C	A	C	C	C	A	A	G	C	C	T	G	0	0	P	M
SEN_TH_105.2012	2012	T	A	C	T	C	C	A	G	A	T	C	G	C	A	C	C	C	A	A	G	C	C	T	G	0	0	P	M
SEN_TH_209.2012	2012	T	A	C	T	C	C	A	G	A	T	C	G	C	A	C	C	C	A	A	G	C	C	T	G	0	0	P	M
SEN_TH_240.2012	2012	T	A	C	T	C	C	A	G	A	T	C	G	C	A	C	C	C	A	A	G	C	C	T	G	0	0	P	M
SEN_TH_111.2012	2012	T	A	T	T	G	G	A	G	T	T	T	A	T	A	C	C	T	T	A	G	A	T	T	G	0	0	P	M
SEN_TH_279.2012	2012	T	A	C	T	C	C	A	G	T	T	C	A	C	A	A	C	T	A	A	G	A	T	T	G	0	0	P	M
SEN_TH_020.2012	2012	T	A	C	T	C	C	G	G	T	T	C	G	T	C	C	C	T	T	A	G	A	T	T	G	0	0	P	M
SEN_TH_029.2012	2012	C	A	C	T	G	C	G	A	T	T	T	A	T	C	C	C	C	A	A	G	A	C	T	G	0	0	P	M
SEN_TH_042.2012	2012	C	A	C	T	C	C	A	G	A	T	C	G	T	C	A	C	T	T	A	G	A	C	T	G	0	0	P	M
SEN_TH_064.2012	2012	T	G	C	T	C	C	G	G	T	C	T	A	C	A	A	C	C	T	A	A	A	C	T	G	0	0	P	M
SEN_TH_069.2012	2012	T	A	C	T	C	C	A	G	A	T	C	G	C	A	C	C	C	A	A	G	C	C	T	G	0	0	P	M
SEN_TH_070.2012	2012	T	A	C	T	G	C	G	G	A	C	T	A	T	A	C	C	C	T	C	G	A	C	T	G	0	0	P	M
SEN_TH_073.2012	2012	T	A	C	C	C	G	A	G	A	T	C	G	C	A	C	A	C	A	A	G	A	T	T	G	0	0	P	M
SEN_TH_088.2012	2012	T	A	C	C	C	C	A	G	A	T	T	A	C	A	A	C	C	T	A	G	A	C	T	G	0	0	P	M
SEN_TH_092.2012	2012	T	A	C	T	C	C	G	G	A	T	C	G	C	A	A	C	C	A	A	G	C	T	T	G	0	0	P	M
SEN_TH_093.2012	2012	C	A	C	T	C	G	A	A	A	T	C	A	T	A	A	C	T	A	C	A	C	T	T	G	0	0	P	M
SEN_TH_094.2012	2012	T	A	T	T	C	C	A	G	A	C	T	G	T	A	A	A	C	A	C	G	C	C	T	G	0	0	P	M
SEN_TH_103.2012	2012	T	A	T	T	C	C	A	G	A	T	C	A	C	A	A	A	T	A	C	G	C	C	T	G	0	0	P	M
SEN_TH_110.2012	2012	T	A	T	T	C	G	A	G	A	C	T	G	C	A	C	C	T	T	A	G	A	C	T	G	0	0	P	M
SEN_TH_117.2012	2012	T	A	C	T	C	C	A	G	A	C	T	A	C	C	C	C	C	T	A	G	C	C	T	G	0	0	P	M
SEN_TH_126.2012	2012	T	A	T	T	C	C	A	G	T	C	C	A	C	C	C	A	C	A	A	G	A	C	T	G	0	0	P	M
SEN_TH_140.2012	2012	T	A	C	T	C	C	A	G	A	T	C	G	C	C	A	A	C	A	C	G	C	C	T	G	0	0	P	M
SEN_TH_147.2012	2012	T	A	C	T	C	C	G	G	A	C	T	A	T	C	A	C	C	T	A	G	A	T	T	G	0	0	P	M
SEN_TH_178.2012	2012	T	A	C	T	G	C	G	G	A	C	C	A	C	C	C	C	T	T	A	G	C	C	T	G	0	0	P	M
SEN_TH_185.2012	2012	T	A	C	C	C	C	A	G	A	T	T	A	C	A	A	C	C	A	A	G	C	C	T	G	0	0	P	M
SEN_TH_189.2012	2012	T	A	C	T	G	G	A	G	T	T	T	A	T	A	C	C	C	T	A	G	A	C	T	G	0	0	P	M
SEN_TH_193.2012	2012	T	A	T	C	G	C	A	G	A	T	T	A	C	A	A	A	T	T	A	G	C	T	T	G	0	0	P	M
SEN_TH_197.2012	2012	T	A	C	C	C	C	A	G	T	C	C	A	C	C	C	C	T	T	A	G	A	T	T	G	0	0	P	M
SEN_TH_200.2012	2012	T	G	C	T	C	G	A	G	A	T	T	G	T	A	C	A	C	T	C	G	A	C	T	G	0	0	P	M
SEN_TH_201.2012	2012	T	A	C	C	C	C	A	G	A	T	T	A	C	A	A	C	C	T	A	G	C	C	T	G	0	0	P	M
SEN_TH_206.2012	2012	T	A	C	T	C	C	A	G	A	C	C	G	C	A	A	C	C	A	A	G	A	T	T	G	0	0	P	M
SEN_TH_212.2012	2012	T	A	C	T	G	G	A	G	A	C	T	G	C	C	C	C	C	T	A	G	C	C	T	G	0	0	P	M
SEN_TH_217.2012	2012	C	A	C	T	C	C	A	A	A	T	T	A	T	C	A	C	T	A	A	G	A	T	T	G	0	0	P	M
SEN_TH_232.2012	2012	T	A	C	C	C	G	G	G	A	T	C	A	C	A	C	C	C	A	A	G	C	T	T	G	0	0	P	M
SEN_TH_236.2012	2012	C	A	C	T	C	C	A	G	A	T	C	A	C	C	A	C	C	T	C	A	A	C	T	G	0	0	P	M
SEN_TH_242.2012	2012	T	A	C	C	C	C	G	G	T	C	C	A	C	C	A	A	T	A	A	G	A	C	T	G	0	0	P	M
SEN_TH_256.2012	2012	C	A	T	T	C	G	A	G	T	T	C	G	T	A	C	C	C	A	C	G	C	C	T	G	0	0	P	M
SEN_TH_259.2012	2012	T	A	C	C	G	C	G	G	A	T	T	A	C	A	A	C	T	A	A	G	C	C	T	G	0	0	P	M
SEN_TH_260.2012	2012	T	A	C	T	C	G	A	A	A	T	T	A	T	C	A	C	T	T	A	G	A	T	T	G	0	0	P	M
SEN_TH_263.2012	2012	T	A	C	T	C	C	G	G	A	T	C	G	C	C	C	A	C	A	C	G	A	T	T	G	0	0	P	M
SEN_TH_269.2012	2012	T	A	C	C	C	C	G	A	A	C	T	G	C	A	A	C	T	T	A	G	C	T	T	G	0	0	P	M
SEN_TH_280.2012	2012	T	A	T	T	C	C	A	G	T	C	C	G	T	A	C	C	T	A	A	G	C	T	T	G	0	0	P	M
SEN_TH_282.2012	2012	T	A	C	T	C	C	G	G	T	T	T	G	T	C	C	C	T	A	C	G	A	T	T	G	0	0	P	M
SEN_TH_044.2013	2013	C	A	C	T	C	C	A	G	A	T	T	G	T	A	A	C	C	A	A	G	C	T	T	G	0	0	P	M
SEN_TH_225.2013	2013	T	A	C	T	C	C	G	G	T	T	C	G	T	A	A	A	C	T	C	G	C	C	T	G	0	0	P	M
SEN_TH_256.2013	2013	T	G	C	T	C	C	A	A	T	T	T	A	T	C	C	A	T	A	C	G	C	T	T	G	0	0	P	M
SEN_TH_017.2013	2013	T	A	C	C	C	C	G	G	T	C	C	A	C	C	A	C	T	A	A	A	A	T	T	G	0	0	P	M
SEN_TH_036.2013	2013	T	A	C	C	C	C	G	G	T	C	C	A	C	C	A	C	T	A	A	A	A	T	T	G	0	0	P	M
SEN_TH_050.2013	2013	T	A	C	C	C	C	G	G	T	C	C	A	C	C	A	C	T	A	A	A	A	T	T	G	0	0	P	M
SEN_TH_099.2013	2013	T	A	C	C	C	C	G	G	T	C	C	A	C	C	A	C	T	A	A	A	A	T	T	G	0	0	P	M
SEN_TH_194.2013	2013	T	A	C	C	C	C	G	G	T	C	C	A	C	C	A	C	T	A	A	A	A	T	T	G	0	0	P	M
SEN_TH_201.2013	2013	T	A	C	C	C	C	G	G	T	C	C	A	C	C	A	C	T	A	A	A	A	T	T	G	0	0	P	M
SEN_TH_165.2013	2013	T	A	C	T	C	C	G	G	A	T	C	G	C	A	C	C	C	T	A	G	A	T	T	G	0	0	P	M
SEN_TH_120.2013	2013	C	A	C	C	C	G	A	G	T	C	C	A	C	C	A	A	C	A	A	G	A	C	T	G	0	0	P	M
SEN_TH_030.2013	2013	T	A	C	T	G	G	A	G	T	T	T	A	T	A	C	C	T	T	A	G	A	C	T	G	0	0	P	M
SEN_TH_092.2013	2013	C	A	C	T	C	C	A	G	T	C	C	G	T	C	A	C	C	A	A	G	A	T	T	G	0	0	P	M
SEN_TH_211.2013	2013	C	A	C	T	C	C	A	G	T	C	C	G	T	C	A	C	C	A	A	G	A	T	T	G	0	0	P	M
SEN_TH_245.2013	2013	C	A	C	T	C	C	A	G	T	C	C	G	T	C	A	C	C	A	A	G	A	T	T	G	0	0	P	M
SEN_TH_246.2013	2013	C	A	C	T	C	C	A	G	T	C	C	G	T	C	A	C	C	A	A	G	A	T	T	G	0	0	P	M
SEN_TH_266.2013	2013	C	A	C	T	C	C	A	G	T	C	C	G	T	C	A	C	C	A	A	G	A	T	T	G	0	0	P	M
SEN_TH_276.2013	2013	C	A	C	T	C	C	A	G	T	C	C	G	T	C	A	C	C	A	A	G	A	T	T	G	0	0	P	M
SEN_TH_292.2013	2013	T	A	C	T	C	C	G	G	A	T	T	A	C	A	A	A	T	A	A	G	C	C	T	G	0	0	P	M
SEN_TH_074.2013	2013	T	A	C	C	C	C	G	G	T	C	C	A	C	C	A	A	T	A	A	G	A	C	T	G	0	0	P	M
SEN_TH_118.2013	2013	T	A	C	T	C	C	A	A	A	C	T	A	T	C	C	A	T	T	A	G	A	T	T	G	0	0	P	M
SEN_TH_278.2013	2013	T	A	C	T	C	C	A	A	A	C	T	A	T	C	C	A	T	T	A	G	A	T	T	G	0	0	P	M
SEN_TH_041.2013	2013	C	A	C	T	C	G	A	G	T	T	T	A	C	A	A	C	T	A	A	G	A	T	T	G	0	0	P	M
SEN_TH_064.2013	2013	C	A	C	T	C	G	A	G	T	T	T	A	C	A	A	C	T	A	A	G	A	T	T	G	0	0	P	M
SEN_TH_163.2013	2013	C	A	C	T	C	G	A	G	T	T	T	A	C	A	A	C	T	A	A	G	A	T	T	G	0	0	P	M
SEN_TH_220.2013	2013	C	A	C	T	C	G	A	G	T	T	T	A	C	A	A	C	T	A	A	G	A	T	T	G	0	0	P	M
SEN_TH_233.2013	2013	C	A	C	T	C	G	A	G	T	T	T	A	C	A	A	C	T	A	A	G	A	T	T	G	0	0	P	M
SEN_TH_235.2013	2013	C	A	C	T	C	G	A	G	T	T	T	A	C	A	A	C	T	A	A	G	A	T	T	G	0	0	P	M
SEN_TH_020.2013	2013	T	A	C	T	C	C	G	A	A	C	T	G	C	A	C	A	T	T	A	G	A	T	T	G	0	0	P	M
SEN_TH_063.2013	2013	T	A	C	T	C	C	G	A	A	C	T	G	C	A	C	A	T	T	A	G	A	T	T	G	0	0	P	M
SEN_TH_173.2013	2013	T	A	C	T	C	C	G	A	A	C	T	G	C	A	C	A	T	T	A	G	A	T	T	G	0	0	P	M
SEN_TH_178.2013	2013	T	A	C	T	C	C	G	A	A	C	T	G	C	A	C	A	T	T	A	G	A	T	T	G	0	0	P	M
SEN_TH_191.2013	2013	T	A	C	T	C	C	G	A	A	C	T	G	C	A	C	A	T	T	A	G	A	T	T	G	0	0	P	M
SEN_TH_213.2013	2013	T	A	C	T	C	C	G	A	A	C	T	G	C	A	C	A	T	T	A	G	A	T	T	G	0	0	P	M
SEN_TH_240.2013	2013	T	A	C	T	C	C	G	A	A	C	T	G	C	A	C	A	T	T	A	G	A	T	T	G	0	0	P	M
SEN_TH_274.2013	2013	T	A	C	T	C	C	G	A	A	C	T	G	C	A	C	A	T	T	A	G	A	T	T	G	0	0	P	M
SEN_TH_053.2013	2013	C	A	C	T	C	C	A	A	A	T	T	A	T	C	A	C	C	T	A	G	A	T	T	G	0	0	P	M
SEN_TH_311.2013	2013	T	A	T	T	G	G	G	G	T	T	T	A	T	C	A	C	T	T	A	A	A	C	T	G	0	0	P	M
SEN_TH_312.2013	2013	T	A	T	T	G	C	A	G	T	C	C	A	C	A	A	A	T	A	A	G	C	T	T	G	0	0	P	M
SEN_TH_305.2013	2013	T	A	C	C	C	G	A	A	A	C	T	G	C	C	C	C	T	A	A	G	C	T	T	G	0	0	P	M
SEN_TH_308.2013	2013	T	A	C	C	C	G	A	A	A	C	T	G	C	C	C	C	T	A	A	G	C	T	T	G	0	0	P	M
SEN_TH_097.2013	2013	T	A	C	T	C	G	G	G	T	C	T	A	T	A	A	A	T	A	A	G	A	C	T	G	0	0	P	M
SEN_TH_098.2013	2013	T	A	C	T	C	G	G	G	T	C	T	A	T	A	A	A	T	A	A	G	A	C	T	G	0	0	P	M
SEN_TH_110.2013	2013	T	A	C	T	C	G	A	G	T	T	T	A	T	A	C	C	T	T	A	G	A	C	T	G	0	0	P	M
SEN_TH_121.2013	2013	T	A	C	T	C	G	A	G	T	T	T	A	T	A	C	C	T	T	A	G	A	C	T	G	0	0	P	M
SEN_TH_137.2013	2013	T	A	C	C	C	G	A	G	A	T	C	G	C	A	C	A	C	A	A	G	C	T	T	G	0	0	P	M
SEN_TH_290.2013	2013	T	A	C	C	C	G	A	G	A	T	C	G	C	A	C	A	C	A	A	G	C	T	T	G	0	0	P	M
SEN_TH_291.2013	2013	T	A	C	C	C	G	A	G	A	T	C	G	C	A	C	A	C	A	A	G	C	T	T	G	0	0	P	M
SEN_TH_151.2013	2013	T	A	C	T	C	C	A	G	T	C	C	G	T	C	A	C	T	T	A	G	A	C	T	G	0	0	P	M
SEN_TH_154.2013	2013	T	A	C	T	C	C	A	G	T	C	C	G	T	C	A	C	T	T	A	G	A	C	T	G	0	0	P	M
SEN_TH_183.2013	2013	T	A	C	T	C	C	A	G	T	C	C	G	T	C	A	C	T	T	A	G	A	C	T	G	0	0	P	M
SEN_TH_148.2013	2013	T	A	T	T	C	C	A	G	A	C	C	G	C	A	C	A	T	T	A	G	C	C	T	G	0	0	P	M
SEN_TH_236.2013	2013	T	A	T	T	C	C	A	G	A	C	C	G	C	A	C	A	T	T	A	G	C	C	T	G	0	0	P	M
SEN_TH_279.2013	2013	T	A	T	T	C	C	A	G	A	C	C	G	C	A	C	A	T	T	A	G	C	C	T	G	0	0	P	M
SEN_TH_298.2013	2013	T	A	T	T	C	C	A	G	A	C	C	G	C	A	C	A	T	T	A	G	C	C	T	G	0	0	P	M
SEN_TH_004.2013	2013	T	A	C	T	G	C	A	G	A	T	T	A	C	A	C	C	T	A	A	G	A	C	T	G	0	0	P	M
SEN_TH_008.2013	2013	C	A	C	T	C	C	A	A	A	T	C	A	T	A	C	A	T	A	A	G	C	T	T	G	0	0	P	M
SEN_TH_011.2013	2013	T	A	T	T	G	C	A	G	A	T	T	A	C	A	C	C	C	T	C	A	A	C	T	G	0	0	P	M
SEN_TH_016.2013	2013	T	A	C	T	G	C	G	G	A	T	T	A	C	C	C	C	C	T	C	A	C	T	T	G	0	0	P	M
SEN_TH_018.2013	2013	C	A	C	T	C	C	A	A	A	T	C	A	T	A	C	A	T	A	C	G	C	T	T	G	0	0	P	M
SEN_TH_019.2013	2013	T	A	C	C	G	C	G	G	T	C	C	A	C	C	C	C	T	A	A	A	A	T	T	G	0	0	P	M
SEN_TH_021.2013	2013	T	A	C	T	G	G	A	G	T	T	T	G	C	C	A	C	C	A	A	G	C	C	T	G	0	0	P	M
SEN_TH_026.2013	2013	T	A	C	T	G	G	G	A	T	T	T	A	T	C	A	C	T	T	A	G	A	T	T	G	0	0	P	M
SEN_TH_027.2013	2013	C	A	C	C	G	C	G	A	A	T	T	A	C	A	A	A	C	A	A	G	A	C	T	G	0	0	P	M
SEN_TH_029.2013	2013	C	A	T	T	C	C	A	A	T	T	T	G	C	A	C	C	T	T	A	G	A	C	T	G	0	0	P	M
SEN_TH_043.2013	2013	C	A	C	T	C	C	A	G	T	C	C	G	T	C	C	C	T	A	A	G	C	T	T	G	0	0	P	M
SEN_TH_048.2013	2013	C	A	C	T	C	C	A	G	T	C	C	A	C	A	C	A	T	A	C	G	C	C	T	G	0	0	P	M
SEN_TH_056.2013	2013	C	A	C	T	C	C	A	A	A	T	T	A	T	A	C	A	T	A	C	G	C	T	T	G	0	0	P	M
SEN_TH_062.2013	2013	T	A	T	C	C	G	A	G	A	T	C	G	C	A	C	C	C	A	A	G	A	T	T	G	0	0	P	M
SEN_TH_067.2013	2013	T	A	C	T	G	C	G	G	A	C	T	A	T	A	A	C	C	T	A	G	C	T	T	G	0	0	P	M
SEN_TH_068.2013	2013	T	A	C	C	C	C	A	G	A	T	T	A	C	A	C	C	C	T	A	G	C	C	T	G	0	0	P	M
SEN_TH_070.2013	2013	T	A	C	T	C	G	G	A	T	C	T	G	C	A	A	C	C	A	A	A	C	C	T	G	0	0	P	M
SEN_TH_081.2013	2013	C	A	C	T	C	C	G	G	T	C	C	A	C	C	A	C	C	A	A	A	A	T	T	G	0	0	P	M
SEN_TH_083.2013	2013	T	A	T	T	C	C	A	A	T	T	T	A	T	A	C	C	C	A	A	G	C	C	T	G	0	0	P	M
SEN_TH_103.2013	2013	T	A	C	T	C	G	A	G	T	T	T	A	T	A	A	C	C	A	C	G	A	C	T	G	0	0	P	M
SEN_TH_106.2013	2013	T	A	T	T	G	C	A	G	A	T	T	G	C	A	C	A	C	T	A	G	C	T	T	G	0	0	P	M
SEN_TH_112.2013	2013	T	A	T	T	C	G	G	G	A	C	C	G	C	A	A	C	T	A	C	G	C	C	T	G	0	0	P	M
SEN_TH_113.2013	2013	T	A	C	T	G	G	A	G	A	T	T	G	C	A	A	C	T	A	A	G	A	C	T	G	0	0	P	M
SEN_TH_116.2013	2013	T	A	C	T	G	C	A	G	A	T	C	G	C	A	C	A	C	T	A	G	C	C	T	G	0	0	P	M
SEN_TH_131.2013	2013	T	A	C	T	C	G	A	G	T	T	T	A	T	A	C	A	C	A	C	G	A	C	T	G	0	0	P	M
SEN_TH_133.2013	2013	T	A	C	T	G	C	A	A	T	C	C	G	C	C	C	A	T	A	A	A	C	T	T	G	0	0	P	M
SEN_TH_146.2013	2013	C	A	C	C	C	C	G	G	A	T	C	G	C	A	C	A	C	T	A	A	A	T	T	G	0	0	P	M
SEN_TH_157.2013	2013	T	A	T	T	C	G	G	G	A	T	T	G	T	A	A	C	C	A	C	G	A	T	T	G	0	0	P	M
SEN_TH_169.2013	2013	T	A	C	T	C	G	G	G	A	T	C	G	C	A	C	C	C	T	A	G	A	T	T	G	0	0	P	M
SEN_TH_171.2013	2013	T	A	T	T	G	C	G	G	T	T	T	A	T	A	C	C	C	T	A	G	C	C	T	G	0	0	P	M
SEN_TH_179.2013	2013	T	A	C	T	C	C	A	G	T	T	C	G	T	C	C	C	C	T	A	G	C	T	T	G	0	0	P	M
SEN_TH_181.2013	2013	T	A	C	T	C	C	G	G	A	T	C	G	C	A	C	C	C	A	A	G	A	T	T	G	0	0	P	M
SEN_TH_186.2013	2013	T	A	C	C	C	C	A	G	A	C	T	G	C	A	C	A	C	A	C	G	C	C	T	G	0	0	P	M
SEN_TH_193.2013	2013	T	A	C	T	G	G	G	G	T	T	T	A	T	C	A	C	T	T	A	G	A	T	T	G	0	0	P	M
SEN_TH_197.2013	2013	T	A	C	C	C	G	A	G	T	T	T	A	C	C	C	C	T	A	A	G	A	C	T	G	0	0	P	M
SEN_TH_200.2013	2013	T	A	C	T	C	G	A	G	T	T	C	G	T	A	C	C	T	T	A	G	C	C	T	G	0	0	P	M
SEN_TH_203.2013	2013	T	A	C	T	C	C	G	A	T	T	C	G	T	C	C	C	C	T	A	G	A	T	T	G	0	0	P	M
SEN_TH_204.2013	2013	T	A	C	T	C	C	G	G	A	C	T	G	C	A	C	A	T	T	A	G	A	T	T	G	0	0	P	M
SEN_TH_206.2013	2013	T	A	C	T	C	G	A	A	T	T	T	A	T	A	C	C	T	T	A	G	A	C	T	G	0	0	P	M
SEN_TH_208.2013	2013	T	A	C	T	C	C	A	A	A	T	T	A	T	A	A	C	C	T	C	G	C	C	T	G	0	0	P	M
SEN_TH_210.2013	2013	T	A	C	T	C	G	G	G	A	T	C	G	T	A	A	C	C	A	C	G	C	T	T	G	0	0	P	M
SEN_TH_214.2013	2013	C	A	C	T	C	G	A	G	T	T	C	G	C	A	A	C	C	A	A	G	C	C	T	G	0	0	P	M
SEN_TH_216.2013	2013	T	A	C	T	G	G	G	G	A	T	C	G	C	A	C	C	C	T	A	G	A	C	T	G	0	0	P	M
SEN_TH_217.2013	2013	T	A	C	T	C	C	A	G	A	T	T	A	T	A	A	C	C	T	C	G	C	C	T	G	0	0	P	M
SEN_TH_221.2013	2013	T	A	C	T	G	C	G	G	T	C	T	G	C	C	C	C	T	T	C	G	C	T	T	G	0	0	P	M
SEN_TH_223.2013	2013	C	A	C	T	C	C	A	G	A	C	C	G	T	A	C	C	C	A	A	A	C	C	T	G	0	0	P	M
SEN_TH_224.2013	2013	T	A	C	T	C	G	A	G	T	C	C	G	T	A	C	C	T	T	A	G	C	C	T	G	0	0	P	M
SEN_TH_227.2013	2013	T	A	C	T	C	C	G	G	T	T	T	A	T	A	C	C	C	T	A	G	A	C	T	G	0	0	P	M
SEN_TH_228.2013	2013	T	A	C	T	C	C	A	G	T	C	T	A	C	A	A	C	T	T	C	A	C	T	T	G	0	0	P	M
SEN_TH_237.2013	2013	T	A	C	T	C	C	A	G	A	T	T	A	C	A	A	C	C	T	A	G	A	T	T	G	0	0	P	M
SEN_TH_243.2013	2013	C	A	C	T	C	G	A	G	A	C	T	G	C	A	C	A	C	T	A	A	A	T	T	G	0	0	P	M
SEN_TH_247.2013	2013	T	A	T	T	C	C	A	G	T	T	T	A	T	A	A	C	C	T	A	A	A	T	T	G	0	0	P	M
SEN_TH_277.2013	2013	T	A	C	C	C	C	G	G	A	T	C	G	C	C	C	C	C	A	A	G	A	C	T	G	0	0	P	M
SEN_TH_280.2013	2013	T	A	C	T	C	C	G	G	A	T	C	G	C	A	A	C	C	T	A	G	A	C	T	G	0	0	P	M
SEN_TH_284.2013	2013	T	A	C	C	C	C	G	G	T	T	C	A	C	C	A	C	T	A	A	A	A	T	T	G	0	0	P	M
SEN_TH_286.2013	2013	C	A	T	C	G	C	A	G	T	T	C	G	T	A	A	C	T	T	A	G	A	C	T	G	0	0	P	M
SEN_TH_303.2013	2013	T	A	C	T	G	C	A	G	A	C	T	A	T	A	C	C	C	A	A	G	A	C	T	G	0	0	P	M
SEN_TH_066.2014	2014	T	A	C	C	C	C	G	G	T	C	C	A	C	C	A	C	T	A	A	A	A	T	T	G	0	0	P	M
SEN_TH_060.2014	2014	C	A	C	T	C	C	A	G	T	C	C	G	T	C	A	C	C	A	A	G	A	T	T	G	0	0	P	M
SEN_TH_201.2014	2014	C	A	C	T	C	C	A	G	T	C	C	G	T	C	A	C	C	A	A	G	A	T	T	G	0	0	P	M
SEN_TH_098.2014	2014	T	A	C	C	C	C	G	G	T	C	C	A	C	C	A	A	T	A	A	G	A	C	T	G	0	0	P	M
SEN_TH_042.2014	2014	T	A	C	T	G	G	A	G	T	C	C	G	T	A	C	C	T	T	A	G	C	T	T	G	0	0	P	M
SEN_TH_120.2014	2014	T	A	C	T	C	C	G	G	T	T	C	G	T	C	C	C	C	T	A	G	A	T	T	G	0	0	P	M
SEN_TH_125.2014	2014	T	A	C	T	C	C	A	A	A	C	T	A	T	C	C	A	T	T	A	G	A	T	T	G	0	0	P	M
SEN_TH_003.2014	2014	C	A	C	T	C	G	A	G	T	T	T	A	C	A	A	C	T	A	A	G	A	T	T	G	0	0	P	M
SEN_TH_005.2014	2014	C	A	C	T	C	G	A	G	T	T	T	A	C	A	A	C	T	A	A	G	A	T	T	G	0	0	P	M
SEN_TH_014.2014	2014	C	A	C	T	C	G	A	G	T	T	T	A	C	A	A	C	T	A	A	G	A	T	T	G	0	0	P	M
SEN_TH_035.2014	2014	C	A	C	T	C	G	A	G	T	T	T	A	C	A	A	C	T	A	A	G	A	T	T	G	0	0	P	M
SEN_TH_047.2014	2014	C	A	C	T	C	G	A	G	T	T	T	A	C	A	A	C	T	A	A	G	A	T	T	G	0	0	P	M
SEN_TH_056.2014	2014	C	A	C	T	C	G	A	G	T	T	T	A	C	A	A	C	T	A	A	G	A	T	T	G	0	0	P	M
SEN_TH_075.2014	2014	C	A	C	T	C	G	A	G	T	T	T	A	C	A	A	C	T	A	A	G	A	T	T	G	0	0	P	M
SEN_TH_077.2014	2014	C	A	C	T	C	G	A	G	T	T	T	A	C	A	A	C	T	A	A	G	A	T	T	G	0	0	P	M
SEN_TH_080.2014	2014	C	A	C	T	C	G	A	G	T	T	T	A	C	A	A	C	T	A	A	G	A	T	T	G	0	0	P	M
SEN_TH_103.2014	2014	C	A	C	T	C	G	A	G	T	T	T	A	C	A	A	C	T	A	A	G	A	T	T	G	0	0	P	M
SEN_TH_146.2014	2014	C	A	C	T	C	G	A	G	T	T	T	A	C	A	A	C	T	A	A	G	A	T	T	G	0	0	P	M
SEN_TH_160.2014	2014	C	A	C	T	C	G	A	G	T	T	T	A	C	A	A	C	T	A	A	G	A	T	T	G	0	0	P	M
SEN_TH_169.2014	2014	C	A	C	T	C	G	A	G	T	T	T	A	C	A	A	C	T	A	A	G	A	T	T	G	0	0	P	M
SEN_TH_106.2014	2014	T	A	C	T	C	C	G	A	A	C	T	G	C	A	C	A	T	T	A	G	A	T	T	G	0	0	P	M
SEN_TH_108.2014	2014	T	A	C	T	C	C	G	A	A	C	T	G	C	A	C	A	T	T	A	G	A	T	T	G	0	0	P	M
SEN_TH_147.2014	2014	T	A	C	T	C	C	G	A	A	C	T	G	C	A	C	A	T	T	A	G	A	T	T	G	0	0	P	M
SEN_TH_163.2014	2014	T	A	C	T	C	C	G	A	A	C	T	G	C	A	C	A	T	T	A	G	A	T	T	G	0	0	P	M
SEN_TH_186.2014	2014	T	A	T	C	C	G	A	G	A	T	C	G	C	A	C	C	C	A	A	G	A	T	T	G	0	0	P	M
SEN_TH_189.2014	2014	T	A	T	C	C	G	A	G	A	T	C	G	C	A	C	C	C	A	A	G	A	T	T	G	0	0	P	M
SEN_TH_190.2014	2014	T	A	T	C	C	G	A	G	A	T	C	G	C	A	C	C	C	A	A	G	A	T	T	G	0	0	P	M
SEN_TH_196.2014	2014	T	A	T	C	C	G	A	G	A	T	C	G	C	A	C	C	C	A	A	G	A	T	T	G	0	0	P	M
SEN_TH_084.2014	2014	C	A	C	T	C	C	G	G	T	C	C	A	C	C	A	C	C	A	A	A	A	T	T	G	0	0	P	M
SEN_TH_004.2014	2014	C	A	C	T	C	G	A	G	A	T	T	G	T	A	C	C	C	A	A	A	A	T	T	G	0	0	P	M
SEN_TH_081.2014	2014	T	A	C	T	C	C	A	G	T	C	T	A	C	A	C	A	C	A	C	G	C	T	T	G	0	0	P	M
SEN_TH_097.2014	2014	T	A	C	T	C	C	A	G	T	C	T	A	C	A	C	A	C	A	A	G	C	T	T	G	0	0	P	M
SEN_TH_154.2014	2014	T	A	C	T	C	C	A	G	T	C	T	A	C	A	C	A	C	A	A	G	C	T	T	G	0	0	P	M
SEN_TH_193.2014	2014	C	A	C	T	G	G	A	G	A	T	C	A	C	A	C	C	C	T	A	G	C	T	T	G	0	0	P	M
SEN_TH_194.2014	2014	C	A	C	T	G	G	A	G	A	T	C	A	C	A	C	C	C	T	A	G	C	T	T	G	0	0	P	M
SEN_TH_198.2014	2014	C	A	C	T	G	G	A	G	A	T	C	A	C	A	C	C	C	T	A	G	C	T	T	G	0	0	P	M
SEN_TH_011.2014	2014	T	A	C	T	G	G	A	G	T	C	C	G	T	C	C	C	T	A	A	G	C	T	T	G	0	0	P	M
SEN_TH_037.2014	2014	T	A	C	T	G	G	A	G	T	C	C	G	T	C	C	C	T	A	A	G	C	T	T	G	0	0	P	M
SEN_TH_057.2014	2014	T	A	C	T	G	G	A	G	T	C	C	G	T	C	C	C	T	A	A	G	C	T	T	G	0	0	P	M
SEN_TH_015.2014	2014	T	A	C	T	G	G	A	G	A	C	T	A	C	C	C	C	C	A	A	G	C	C	T	G	0	0	P	M
SEN_TH_016.2014	2014	T	A	C	T	G	G	A	G	A	C	T	A	C	C	C	C	C	A	A	G	C	C	T	G	0	0	P	M
SEN_TH_017.2014	2014	T	A	C	T	G	G	A	G	A	C	T	A	C	C	C	C	C	A	A	G	C	C	T	G	0	0	P	M
SEN_TH_018.2014	2014	C	A	C	T	C	C	A	G	T	T	T	A	T	A	A	A	C	A	A	G	C	C	T	G	0	0	P	M
SEN_TH_026.2014	2014	C	A	C	T	C	C	A	G	T	T	T	A	T	A	A	A	C	A	A	G	C	C	T	G	0	0	P	M
SEN_TH_041.2014	2014	C	A	C	T	C	C	A	G	T	T	T	A	T	A	A	A	C	A	A	G	C	C	T	G	0	0	P	M
SEN_TH_019.2014	2014	C	A	C	C	C	C	G	A	A	T	C	A	C	A	C	C	T	A	A	G	A	C	T	G	0	0	P	M
SEN_TH_020.2014	2014	C	A	C	C	C	C	G	A	A	T	C	A	C	A	C	C	T	A	A	G	A	C	T	G	0	0	P	M
SEN_TH_024.2014	2014	C	A	C	C	C	C	G	A	A	T	C	A	C	A	C	C	T	A	A	G	A	C	T	G	0	0	P	M
SEN_TH_029.2014	2014	C	A	C	C	C	C	G	A	A	T	C	A	C	A	C	C	T	A	A	G	A	C	T	G	0	0	P	M
SEN_TH_031.2014	2014	C	A	C	C	C	C	G	A	A	T	C	A	C	A	C	C	T	A	A	G	A	C	T	G	0	0	P	M
SEN_TH_027.2014	2014	T	G	C	T	C	C	A	G	A	C	C	A	C	A	C	A	C	A	A	A	A	C	T	G	0	0	P	M
SEN_TH_030.2014	2014	T	G	C	T	C	C	A	G	A	C	C	A	C	A	C	A	C	A	A	A	A	C	T	G	0	0	P	M
SEN_TH_033.2014	2014	T	G	C	T	C	C	A	G	A	C	C	A	C	A	C	A	C	A	A	A	A	C	T	G	0	0	P	M
SEN_TH_036.2014	2014	T	A	C	C	C	G	G	G	A	T	C	G	C	A	C	A	C	T	A	A	A	T	T	G	0	0	P	M
SEN_TH_055.2014	2014	T	A	C	C	C	G	G	G	A	T	C	G	C	A	C	A	C	T	A	A	A	T	T	G	0	0	P	M
SEN_TH_072.2014	2014	T	A	C	C	C	G	G	G	A	T	C	G	C	A	C	A	C	T	A	A	A	T	T	G	0	0	P	M
SEN_TH_200.2014	2014	T	G	C	T	C	C	A	G	A	C	C	A	C	A	C	A	C	A	A	A	A	C	T	G	0	0	P	M
SEN_TH_049.2014	2014	C	A	C	C	G	C	G	G	T	C	C	A	C	C	A	C	C	T	A	G	A	C	T	G	0	0	P	M
SEN_TH_076.2014	2014	C	A	C	C	G	C	G	G	T	C	C	A	C	C	A	C	C	T	A	G	A	C	T	G	0	0	P	M
SEN_TH_176.2014	2014	C	A	C	C	G	C	G	G	T	C	C	A	C	C	A	C	C	T	A	G	A	C	T	G	0	0	P	M
SEN_TH_051.2014	2014	T	A	C	T	C	C	A	G	A	C	C	G	T	A	C	C	T	T	C	G	A	T	T	G	0	0	P	M
SEN_TH_052.2014	2014	T	A	C	T	C	C	A	G	A	C	C	G	T	A	C	C	T	T	C	G	A	T	T	G	0	0	P	M
SEN_TH_053.2014	2014	T	A	C	T	C	C	A	G	A	C	C	G	T	A	C	C	T	T	C	G	A	T	T	G	0	0	P	M
SEN_TH_063.2014	2014	T	A	C	T	C	C	A	G	A	C	C	G	T	A	C	C	T	T	C	G	A	T	T	G	0	0	P	M
SEN_TH_062.2014	2014	T	A	C	T	C	C	A	G	A	T	C	G	C	A	C	C	C	T	C	G	C	C	T	G	0	0	P	M
SEN_TH_100.2014	2014	T	A	C	T	C	C	A	G	A	T	C	G	C	A	C	C	C	T	C	G	C	C	T	G	0	0	P	M
SEN_TH_078.2014	2014	C	A	T	T	C	G	A	G	T	T	T	A	C	A	A	C	T	A	A	G	A	T	T	G	0	0	P	M
SEN_TH_118.2014	2014	C	A	T	T	C	G	A	G	T	T	T	A	C	A	A	C	T	A	A	G	A	T	T	G	0	0	P	M
SEN_TH_182.2014	2014	C	A	T	T	C	G	A	G	T	T	T	A	C	A	A	C	T	A	A	G	A	T	T	G	0	0	P	M
SEN_TH_083.2014	2014	C	A	C	T	C	G	A	G	T	T	T	A	C	A	A	C	T	A	A	G	C	T	T	G	0	0	P	M
SEN_TH_167.2014	2014	C	A	C	T	C	G	A	G	T	T	T	A	C	A	A	C	T	A	A	G	C	T	T	G	0	0	P	M
SEN_TH_090.2014	2014	T	A	C	T	C	C	G	G	A	C	T	G	C	A	C	C	T	A	A	G	A	C	T	G	0	0	P	M
SEN_TH_094.2014	2014	T	A	C	T	C	C	G	G	A	C	T	G	C	A	C	C	T	A	A	G	A	C	T	G	0	0	P	M
SEN_TH_101.2014	2014	T	A	C	T	C	C	G	G	A	C	T	G	C	A	C	C	T	A	A	G	A	C	T	G	0	0	P	M
SEN_TH_115.2014	2014	T	A	C	T	C	C	G	G	A	C	T	G	C	A	C	C	T	A	A	G	A	C	T	G	0	0	P	M
SEN_TH_109.2014	2014	C	A	T	T	C	C	A	G	T	C	T	G	C	C	C	C	C	A	A	G	A	T	T	G	0	0	P	M
SEN_TH_152.2014	2014	C	A	T	T	C	C	A	G	T	C	T	G	C	C	C	C	C	A	A	G	A	T	T	G	0	0	P	M
SEN_TH_110.2014	2014	T	A	C	T	G	G	A	G	A	T	T	G	C	C	A	A	C	A	A	G	C	T	T	G	0	0	P	M
SEN_TH_170.2014	2014	T	A	C	T	G	G	A	G	A	T	T	G	C	C	A	A	C	A	A	G	C	T	T	G	0	0	P	M
SEN_TH_130.2014	2014	C	A	T	T	C	G	A	G	A	C	T	G	C	A	C	A	T	T	A	A	C	T	T	G	0	0	P	M
SEN_TH_175.2014	2014	C	A	T	T	C	G	A	G	A	C	T	G	C	A	C	A	T	T	A	A	C	T	T	G	0	0	P	M
SEN_TH_135.2014	2014	T	A	C	C	C	G	A	A	A	C	T	A	C	C	C	C	T	A	A	G	C	T	T	G	0	0	P	M
SEN_TH_148.2014	2014	T	A	C	C	C	G	A	A	A	C	T	A	C	C	C	C	T	A	A	G	C	T	T	G	0	0	P	M
SEN_TH_149.2014	2014	T	A	C	C	C	G	A	A	A	C	T	A	C	C	C	C	T	A	A	G	C	T	T	G	0	0	P	M
SEN_TH_150.2014	2014	T	A	C	C	C	G	A	A	A	C	T	A	C	C	C	C	T	A	A	G	C	T	T	G	0	0	P	M
SEN_TH_153.2014	2014	T	A	C	C	C	G	A	A	A	C	T	A	C	C	C	C	T	A	A	G	C	T	T	G	0	0	P	M
SEN_TH_159.2014	2014	T	A	C	C	C	G	A	A	A	C	T	A	C	C	C	C	T	A	A	G	C	T	T	G	0	0	P	M
SEN_TH_162.2014	2014	T	A	C	C	C	G	A	A	A	C	T	A	C	C	C	C	T	A	A	G	C	T	T	G	0	0	P	M
SEN_TH_172.2014	2014	T	A	C	C	C	G	A	A	A	C	T	A	C	C	C	C	T	A	A	G	C	T	T	G	0	0	P	M
SEN_TH_173.2014	2014	T	A	C	C	C	G	A	A	A	C	T	A	C	C	C	C	T	A	A	G	C	T	T	G	0	0	P	M
SEN_TH_191.2014	2014	T	A	C	C	C	G	A	A	A	C	T	A	C	C	C	C	T	A	A	G	C	T	T	G	0	0	P	M
SEN_TH_192.2014	2014	T	A	C	C	C	G	A	A	A	C	T	A	C	C	C	C	T	A	A	G	C	T	T	G	0	0	P	M
SEN_TH_140.2014	2014	C	A	C	C	C	C	A	G	A	T	C	G	C	C	A	C	C	A	A	G	A	T	T	G	0	0	P	M
SEN_TH_187.2014	2014	C	A	C	C	C	C	A	G	A	T	C	G	C	C	A	C	C	A	A	G	A	T	T	G	0	0	P	M
SEN_TH_157.2014	2014	T	A	C	C	C	G	G	A	A	T	T	A	C	A	C	A	C	A	A	G	A	T	T	G	0	0	P	M
SEN_TH_183.2014	2014	T	A	C	C	C	G	G	A	A	T	T	A	C	A	C	A	C	A	A	G	A	T	T	G	0	0	P	M
SEN_TH_010.2014	2014	T	A	C	T	C	C	G	G	A	T	C	G	C	A	C	A	T	A	A	A	A	T	T	G	0	0	P	M
SEN_TH_021.2014	2014	C	A	C	C	C	C	G	A	A	T	C	A	C	A	C	A	T	A	A	G	A	C	T	G	0	0	P	M
SEN_TH_025.2014	2014	C	A	C	T	G	C	A	G	T	T	C	A	T	A	C	C	T	T	C	G	C	C	T	G	0	0	P	M
SEN_TH_039.2014	2014	T	A	T	T	G	G	A	G	T	T	T	G	T	A	A	C	C	T	A	G	C	C	T	G	0	0	P	M
SEN_TH_044.2014	2014	T	A	T	C	C	G	A	G	A	T	C	G	C	A	C	C	C	A	A	A	C	T	T	G	0	0	P	M
SEN_TH_046.2014	2014	T	A	C	T	G	C	G	G	A	T	C	G	C	A	C	A	T	A	A	G	A	T	T	G	0	0	P	M
SEN_TH_061.2014	2014	C	A	C	T	C	C	A	G	T	C	C	G	T	C	A	C	C	A	A	G	C	T	T	G	0	0	P	M
SEN_TH_065.2014	2014	T	A	C	T	C	G	G	A	T	C	T	A	C	C	A	C	C	T	A	G	C	T	T	G	0	0	P	M
SEN_TH_069.2014	2014	T	A	C	T	C	C	A	G	T	C	C	G	T	A	C	C	T	A	C	G	C	C	T	G	0	0	P	M
SEN_TH_079.2014	2014	T	A	C	T	C	C	G	A	A	C	T	A	C	C	C	C	T	A	A	G	C	T	T	G	0	0	P	M
SEN_TH_082.2014	2014	C	A	C	C	C	G	G	G	A	T	T	A	C	A	C	A	C	A	A	G	A	T	T	G	0	0	P	M
SEN_TH_089.2014	2014	T	A	T	T	C	G	A	A	A	T	C	G	C	C	C	C	C	T	C	G	C	C	T	G	0	0	P	M
SEN_TH_091.2014	2014	T	A	T	T	C	G	G	G	T	C	T	G	C	A	A	C	C	A	C	A	C	T	T	G	0	0	P	M
SEN_TH_093.2014	2014	C	A	C	T	C	C	A	G	A	T	T	A	T	A	C	A	C	T	A	G	A	C	T	G	0	0	P	M
SEN_TH_095.2014	2014	T	A	T	T	C	C	A	A	T	C	C	G	C	A	C	A	T	T	A	G	C	T	T	G	0	0	P	M
SEN_TH_102.2014	2014	T	A	T	T	C	C	A	G	A	C	T	A	C	A	C	C	C	A	A	G	A	T	T	G	0	0	P	M
SEN_TH_105.2014	2014	C	A	T	C	G	C	A	G	T	C	C	G	T	A	A	C	T	T	A	G	A	C	T	G	0	0	P	M
SEN_TH_112.2014	2014	C	A	T	T	C	C	A	G	A	T	T	A	T	A	A	C	T	A	C	G	A	T	T	G	0	0	P	M
SEN_TH_117.2014	2014	T	A	T	T	C	C	G	G	A	T	C	G	C	C	C	A	T	T	A	A	A	T	T	G	0	0	P	M
SEN_TH_119.2014	2014	T	A	T	T	G	C	A	G	T	C	C	A	C	A	A	A	C	A	A	G	C	T	T	G	0	0	P	M
SEN_TH_121.2014	2014	T	A	C	T	C	C	G	G	A	T	C	G	T	A	C	A	C	A	A	G	C	C	T	G	0	0	P	M
SEN_TH_128.2014	2014	C	A	T	T	C	G	A	G	A	C	C	G	C	A	C	A	T	T	A	A	C	T	T	G	0	0	P	M
SEN_TH_129.2014	2014	T	A	C	T	C	G	A	G	T	C	T	A	T	A	C	C	C	A	A	A	C	T	T	G	0	0	P	M
SEN_TH_131.2014	2014	C	A	C	T	C	G	G	G	T	C	T	A	C	A	A	A	T	A	A	G	A	T	T	G	0	0	P	M
SEN_TH_133.2014	2014	T	A	C	T	C	G	A	G	T	T	T	A	C	A	A	C	C	T	A	G	C	T	T	G	0	0	P	M
SEN_TH_134.2014	2014	C	A	T	T	C	C	A	G	A	T	T	A	C	A	C	A	C	A	C	G	A	C	T	G	0	0	P	M
SEN_TH_137.2014	2014	T	A	C	T	C	C	A	A	A	C	T	A	T	C	C	A	T	T	C	G	A	T	T	G	0	0	P	M
SEN_TH_142.2014	2014	T	A	T	C	C	C	G	G	T	C	C	A	C	C	A	A	T	A	A	G	C	C	T	G	0	0	P	M
SEN_TH_156.2014	2014	T	A	C	C	C	G	G	G	T	C	C	A	C	C	C	A	C	T	A	G	A	T	T	G	0	0	P	M
SEN_TH_158.2014	2014	T	A	C	C	G	C	G	G	T	C	C	G	T	A	C	C	T	T	A	G	A	C	T	G	0	0	P	M
SEN_TH_164.2014	2014	T	A	C	C	C	G	A	A	A	T	T	A	C	A	C	A	C	A	A	G	A	T	T	G	0	0	P	M
SEN_TH_165.2014	2014	T	A	C	C	C	C	G	G	A	T	C	G	C	C	C	A	T	A	A	A	A	T	T	G	0	0	P	M
SEN_TH_166.2014	2014	T	A	C	T	C	G	A	G	T	T	T	A	C	A	A	C	C	A	A	G	A	T	T	G	0	0	P	M
SEN_TH_168.2014	2014	T	A	C	T	C	G	G	G	T	C	T	G	T	C	C	C	T	A	A	G	C	T	T	G	0	0	P	M
SEN_TH_174.2014	2014	T	A	C	T	G	C	A	G	A	C	C	G	C	A	A	A	T	T	A	G	C	T	T	G	0	0	P	M
SEN_TH_179.2014	2014	T	A	T	T	C	G	A	G	T	C	C	A	C	C	C	A	C	T	A	G	A	T	T	G	0	0	P	M
SEN_TH_181.2014	2014	C	A	T	C	G	C	A	A	A	C	T	G	T	A	C	C	T	A	C	G	A	T	T	G	0	0	P	M
SEN_TH_185.2014	2014	T	A	C	C	C	G	A	G	A	T	C	G	C	A	C	C	C	A	A	G	A	T	T	G	0	0	P	M
SEN_TH_188.2014	2014	T	A	C	T	C	C	A	G	T	C	T	A	C	A	C	A	C	A	C	G	C	C	T	G	0	0	P	M
SEN_TH_001.2015	2015	T	A	T	C	C	C	A	G	A	T	C	G	C	A	A	A	C	T	A	G	A	T	T	G	0	0	P	M
SEN_TH_002.2015	2015	C	A	C	C	C	G	A	G	A	T	T	A	C	A	A	A	C	A	C	G	C	C	T	G	0	0	P	M
SEN_TH_003.2015	2015	T	A	C	T	C	C	A	G	T	C	T	A	C	A	C	A	C	A	A	G	C	T	T	G	0	0	P	M
SEN_TH_007.2015	2015	T	A	T	T	G	C	A	G	A	T	T	G	C	A	C	A	T	A	A	G	C	T	T	G	0	0	P	M
SEN_TH_008.2015	2015	C	A	C	C	C	C	A	G	A	T	T	A	C	A	A	A	C	T	C	G	C	C	T	G	0	0	P	M
SEN_TH_009.2015	2015	T	A	C	T	C	C	A	G	T	C	T	A	C	A	C	A	C	A	C	G	C	T	T	G	0	0	P	M
SEN_TH_010.2015	2015	T	A	C	T	G	C	A	G	A	C	C	G	T	A	A	C	C	A	C	G	C	C	T	G	0	0	P	M
SEN_TH_015.2015	2015	C	A	C	C	C	G	A	G	A	T	T	A	C	A	A	A	C	A	C	G	C	C	T	G	0	0	P	M
SEN_TH_016.2015	2015	T	G	C	T	C	C	A	G	A	C	C	G	T	A	C	A	C	A	A	G	C	T	T	G	0	0	P	M
SEN_TH_017.2015	2015	T	G	C	T	C	C	A	A	T	T	C	A	C	A	C	C	C	A	A	A	A	C	T	G	0	0	P	M
SEN_TH_019.2015	2015	T	G	C	T	C	C	A	G	T	C	T	A	C	A	C	A	C	A	A	G	C	T	T	G	0	0	P	M
SEN_TH_021.2015	2015	T	G	C	T	C	C	A	G	A	C	C	G	T	A	C	A	C	A	A	G	C	T	T	G	0	0	P	M
SEN_TH_022.2015	2015	T	G	C	T	C	C	A	A	T	T	C	G	C	C	C	C	T	A	A	G	C	C	T	G	0	0	P	M
SEN_TH_025.2015	2015	T	G	C	T	C	C	A	G	T	C	T	A	C	A	C	A	C	A	C	G	C	T	T	G	0	0	P	M
SEN_TH_028.2015	2015	C	G	C	T	C	C	G	G	T	C	C	A	C	C	C	C	T	A	A	G	C	C	T	G	0	0	P	M
SEN_TH_029.2015	2015	T	G	C	C	C	C	A	G	T	C	T	A	C	A	C	A	C	A	C	G	C	T	T	G	0	0	P	M
SEN_TH_030.2015	2015	T	G	C	C	C	C	A	G	T	C	T	A	C	A	C	A	C	A	C	G	C	T	T	G	0	0	P	M
SEN_TH_034.2015	2015	T	G	C	C	C	C	G	G	T	C	T	G	C	A	C	C	C	A	A	G	C	C	T	G	0	0	P	M
SEN_TH_040.2015	2015	C	G	C	C	C	C	G	G	T	C	T	A	C	C	A	C	C	A	A	G	C	C	T	G	0	0	P	M
SEN_TH_041.2015	2015	T	G	T	C	C	C	G	G	T	T	T	G	C	A	C	A	C	A	C	G	A	C	T	G	0	0	P	M
SEN_TH_042.2015	2015	C	G	T	C	G	C	G	G	A	C	T	G	C	A	A	C	T	T	A	G	C	T	T	G	0	0	P	M
SEN_TH_043.2015	2015	T	A	C	C	C	C	A	G	A	C	C	G	C	A	C	C	T	T	C	A	C	T	T	G	0	0	P	M
SEN_TH_044.2015	2015	T	G	C	C	C	G	G	G	T	T	C	G	C	A	C	C	C	A	C	A	C	C	T	G	0	0	P	M
SEN_TH_048.2015	2015	C	G	T	C	C	C	A	G	T	T	C	A	T	A	A	C	T	A	C	G	A	T	T	G	0	0	P	M
SEN_TH_049.2015	2015	C	G	T	C	C	C	A	G	T	T	C	A	T	A	A	C	T	A	C	G	A	T	T	G	0	0	P	M
SEN_TH_051.2015	2015	C	A	T	C	C	G	A	G	T	C	T	A	C	A	A	C	T	T	C	G	C	C	T	G	0	0	P	M
SEN_TH_055.2015	2015	C	A	C	C	C	C	A	G	A	T	T	A	C	A	A	A	C	T	C	G	C	C	T	G	0	0	P	M
SEN_TH_056.2015	2015	T	A	C	C	C	C	A	G	T	C	C	G	T	C	A	C	C	A	A	G	A	T	T	G	0	0	P	M
SEN_TH_058.2015	2015	C	A	T	C	C	C	A	G	A	T	C	G	C	A	C	A	C	A	A	G	A	T	T	G	0	0	P	M
SEN_TH_059.2015	2015	C	A	C	C	C	C	A	G	T	T	T	A	T	A	A	C	C	A	A	A	A	C	T	G	0	0	P	M
SEN_TH_060.2015	2015	C	A	C	C	C	G	A	G	A	T	T	A	C	A	A	A	C	A	C	G	C	C	T	G	0	0	P	M
SEN_TH_061.2015	2015	C	A	C	C	C	G	A	G	A	T	T	A	C	A	A	A	C	A	C	G	C	C	T	G	0	0	P	M
SEN_TH_062.2015	2015	C	A	C	C	C	C	A	G	A	T	T	A	C	A	A	A	C	T	C	G	C	C	T	G	0	0	P	M
SEN_TH_063.2015	2015	C	A	C	C	C	C	A	G	A	T	T	A	C	A	A	A	C	T	C	G	C	C	T	G	0	0	P	M
SEN_TH_065.2015	2015	C	A	C	T	C	C	G	G	T	T	T	A	C	A	A	C	T	T	A	G	A	T	T	G	0	0	P	M
SEN_TH_066.2015	2015	C	A	C	T	G	G	A	G	A	T	C	A	C	A	C	C	C	T	A	G	C	T	T	G	0	0	P	M
SEN_TH_067.2015	2015	T	A	C	T	C	G	G	G	T	C	C	G	T	A	A	C	T	T	A	G	C	T	T	G	0	0	P	M
SEN_TH_068.2015	2015	T	A	C	T	C	C	A	G	T	C	T	A	C	A	C	A	C	A	A	G	C	T	T	G	0	0	P	M
SEN_TH_069.2015	2015	T	A	T	T	G	C	A	G	A	T	T	G	C	A	C	A	T	A	A	G	C	T	T	G	0	0	P	M
SEN_TH_070.2015	2015	T	A	C	C	G	C	A	G	A	C	T	G	C	C	C	C	C	T	A	G	A	T	T	G	0	0	P	M
SEN_TH_071.2015	2015	T	A	T	T	G	G	A	G	A	T	T	G	C	A	A	A	T	A	A	G	C	T	T	G	0	0	P	M
SEN_TH_072.2015	2015	C	A	C	C	C	G	A	G	A	T	T	A	C	A	A	A	C	A	C	G	C	C	T	G	0	0	P	M
SEN_TH_074.2015	2015	C	A	C	T	G	G	A	G	A	T	C	A	C	A	C	C	C	T	A	G	C	T	T	G	0	0	P	M
SEN_TH_075.2015	2015	C	A	T	T	C	C	A	G	A	T	T	A	T	C	A	A	C	A	A	G	A	C	T	G	0	0	P	M
SEN_TH_076.2015	2015	C	A	C	T	C	C	A	G	A	T	T	A	T	A	A	C	T	A	A	G	A	T	T	G	0	0	P	M
SEN_TH_080.2015	2015	C	A	C	C	C	G	A	G	A	C	C	G	C	C	A	A	T	T	A	G	A	C	T	G	0	0	P	M
SEN_TH_081.2015	2015	T	A	T	C	G	G	A	G	A	T	T	A	T	A	C	C	C	A	A	A	C	T	T	G	0	0	P	M
SEN_TH_082.2015	2015	C	A	C	T	G	G	A	G	A	T	C	A	C	A	C	C	C	T	A	G	C	T	T	G	0	0	P	M
SEN_TH_084.2015	2015	T	A	C	T	C	C	G	G	T	T	T	A	T	A	C	A	C	A	A	G	C	T	T	G	0	0	P	M
SEN_TH_085.2015	2015	C	A	T	T	C	G	G	G	T	T	C	A	T	C	A	C	C	A	A	G	C	T	T	G	0	0	P	M
SEN_TH_087.2015	2015	T	A	C	T	C	C	A	G	T	C	T	A	C	A	C	A	C	A	A	G	C	T	T	G	0	0	P	M
SEN_TH_088.2015	2015	T	A	C	T	C	C	A	G	T	C	T	A	C	A	C	A	C	A	C	G	C	T	T	G	0	0	P	M
SEN_TH_089.2015	2015	C	A	C	C	C	G	A	G	A	T	T	A	C	A	A	A	C	A	C	G	C	C	T	G	0	0	P	M
SEN_TH_090.2015	2015	T	A	C	T	G	C	A	A	A	C	C	G	T	A	C	C	C	A	A	G	A	T	T	G	0	0	P	M
SEN_TH_091.2015	2015	T	A	C	T	G	C	A	A	A	C	C	G	T	A	C	C	C	A	A	G	A	T	T	G	0	0	P	M
SEN_TH_092.2015	2015	T	A	C	T	G	C	A	A	A	C	C	G	T	A	C	C	C	A	A	G	A	T	T	G	0	0	P	M
SEN_TH_098.2015	2015	T	A	C	T	C	C	A	G	A	C	C	G	T	A	C	A	C	A	C	G	C	T	T	G	0	0	P	M
SEN_TH_100.2015	2015	T	A	C	T	C	C	A	G	A	C	C	G	T	A	C	A	C	A	A	G	C	T	T	G	0	0	P	M
SEN_TH_104.2015	2015	T	A	C	T	G	G	A	G	T	T	T	A	T	A	C	C	T	T	A	G	A	C	T	G	0	0	P	M
SEN_TH_105.2015	2015	T	A	T	T	C	C	A	G	T	T	T	A	T	A	C	C	T	T	A	G	A	T	T	G	0	0	P	M
SEN_TH_107.2015	2015	T	A	C	T	G	G	A	G	T	T	T	A	T	A	C	C	T	T	A	G	A	C	T	G	0	0	P	M
SEN_TH_109.2015	2015	T	A	C	T	C	C	A	G	A	T	T	A	T	A	C	C	C	A	C	G	C	C	T	G	0	0	P	M
SEN_TH_111.2015	2015	T	A	C	T	C	C	A	G	T	C	T	A	C	A	C	A	C	A	A	G	C	T	T	G	0	0	P	M
SEN_TH_112.2015	2015	C	A	T	T	C	G	A	G	A	T	T	A	C	A	A	A	C	T	A	A	A	C	T	G	0	0	P	M
SEN_TH_113.2015	2015	C	A	C	T	C	C	A	G	A	C	T	G	T	C	C	C	T	A	A	G	A	T	T	G	0	0	P	M
SEN_TH_115.2015	2015	T	A	C	T	C	C	A	G	T	C	T	A	C	A	C	A	C	A	A	G	C	T	T	G	0	0	P	M
SEN_TH_118.2015	2015	C	A	C	T	C	C	A	A	A	T	C	A	T	C	C	A	T	A	A	A	A	C	T	G	0	0	P	M
SEN_TH_119.2015	2015	C	A	C	T	C	C	A	G	T	C	T	G	T	C	C	C	C	A	A	G	C	T	T	G	0	0	P	M
SEN_TH_120.2015	2015	T	A	C	T	C	C	A	G	T	C	T	A	C	A	C	A	C	A	A	G	C	T	T	G	0	0	P	M
SEN_TH_121.2015	2015	T	A	C	T	C	C	A	G	T	C	T	A	C	A	C	A	C	A	A	G	C	T	T	G	0	0	P	M
SEN_TH_122.2015	2015	T	A	C	T	C	C	A	G	T	C	T	A	C	A	C	A	C	A	A	G	C	T	T	G	0	0	P	M
SEN_TH_123.2015	2015	C	A	C	T	C	G	A	G	T	C	C	A	T	A	A	A	T	A	A	G	C	T	T	G	0	0	P	M
SEN_TH_124.2015	2015	C	A	C	C	C	G	A	G	A	T	T	A	C	A	A	A	C	A	C	G	C	C	T	G	0	0	P	M
SEN_TH_125.2015	2015	T	A	C	C	G	C	G	G	A	C	T	G	C	C	A	A	T	T	A	G	A	T	T	G	0	0	P	M
SEN_TH_126.2015	2015	T	A	C	C	G	G	G	G	A	C	C	A	T	A	C	C	C	A	C	G	C	T	T	G	0	0	P	M
SEN_TH_127.2015	2015	T	A	T	T	C	C	G	G	A	T	T	A	T	A	A	C	C	T	A	A	C	T	T	G	0	0	P	M
SEN_TH_129.2015	2015	C	A	T	T	G	G	A	G	A	T	C	G	C	A	C	C	C	A	A	G	C	T	T	G	0	0	P	M
SEN_TH_130.2015	2015	T	A	C	C	G	G	G	G	A	C	C	A	T	A	C	C	C	A	C	G	C	T	T	G	0	0	P	M
SEN_TH_132.2015	2015	T	A	C	T	C	C	A	G	T	C	T	A	C	A	C	A	C	A	A	G	C	T	T	G	0	0	P	M
SEN_TH_133.2015	2015	T	A	T	T	C	C	G	G	A	T	T	A	T	A	A	C	C	T	A	A	C	T	T	G	0	0	P	M
SEN_TH_134.2015	2015	T	A	T	T	C	C	G	G	A	T	T	A	T	A	A	C	C	T	A	A	C	T	T	G	0	0	P	M
SEN_TH_135.2015	2015	C	A	T	C	G	C	G	G	T	C	C	A	C	C	C	C	C	T	A	G	A	C	T	G	0	0	P	M
SEN_TH_136.2015	2015	T	A	C	T	C	G	A	G	T	T	T	A	T	A	A	C	C	A	A	G	A	C	T	G	0	0	P	M
SEN_TH_138.2015	2015	T	A	T	T	C	C	G	G	A	T	T	A	T	A	A	C	C	T	A	A	C	T	T	G	0	0	P	M
SEN_TH_139.2015	2015	C	A	C	C	C	G	A	G	A	T	T	A	C	A	A	A	C	A	C	G	C	C	T	G	0	0	P	M
SEN_TH_140.2015	2015	T	A	C	T	C	G	G	G	T	C	C	G	T	A	A	C	T	T	A	G	C	T	T	G	0	0	P	M
SEN_TH_143.2015	2015	T	A	C	T	C	G	A	G	T	T	T	A	T	A	A	C	C	A	A	G	A	C	T	G	0	0	P	M
SEN_TH_147.2015	2015	C	A	C	C	C	G	A	G	A	T	T	A	C	A	A	A	C	A	C	G	C	C	T	G	0	0	P	M
SEN_TH_153.2015	2015	T	A	C	T	C	C	A	G	A	T	T	A	T	A	C	C	T	A	C	A	C	C	T	G	0	0	P	M
SEN_TH_154.2015	2015	T	A	C	T	C	C	G	A	A	T	T	G	C	A	A	A	T	T	C	G	A	C	T	G	0	0	P	M
SEN_TH_156.2015	2015	T	A	C	T	C	C	A	G	T	C	T	A	C	A	C	A	C	A	A	G	C	T	T	G	0	0	P	M
SEN_TH_157.2015	2015	C	A	T	T	G	G	A	G	A	T	C	G	C	A	C	C	C	A	A	G	C	T	T	G	0	0	P	M
SEN_TH_159.2015	2015	T	A	C	T	C	C	A	G	T	C	T	A	C	A	C	A	C	A	C	G	C	T	T	G	0	0	P	M
SEN_TH_161.2015	2015	T	A	C	C	G	G	G	G	A	C	C	A	T	A	C	C	C	A	C	G	C	T	T	G	0	0	P	M
SEN_TH_162.2015	2015	T	A	C	C	G	C	A	G	T	C	T	G	C	A	A	C	C	T	A	G	A	T	T	G	0	0	P	M
SEN_TH_163.2015	2015	T	A	C	T	C	C	A	G	T	T	T	A	C	A	A	C	T	A	C	A	A	T	T	G	0	0	P	M
SEN_TH_165.2015	2015	T	A	C	T	C	C	A	G	T	C	T	A	C	A	C	A	C	A	C	G	C	T	T	G	0	0	P	M
SEN_TH_167.2015	2015	C	A	T	C	C	G	A	G	T	T	T	A	T	A	C	C	C	A	A	G	C	T	T	G	0	0	P	M
SEN_TH_169.2015	2015	T	A	C	T	C	C	A	G	T	C	T	A	C	A	C	A	C	A	A	G	C	T	T	G	0	0	P	M
SEN_TH_170.2015	2015	C	A	C	T	C	C	A	A	A	C	T	A	C	A	A	C	C	T	A	G	C	T	T	G	0	0	P	M
SEN_TH_173.2015	2015	T	A	C	T	C	C	A	G	T	C	T	A	C	A	C	A	C	A	C	G	C	T	T	G	0	0	P	M
SEN_TH_175.2015	2015	C	A	C	T	G	G	A	G	A	T	C	A	C	A	C	C	C	T	A	G	C	T	T	G	0	0	P	M
SEN_TH_176.2015	2015	C	A	C	T	C	C	A	A	A	T	T	A	T	C	A	C	C	T	A	G	A	T	T	G	0	0	P	M
SEN_TH_178.2015	2015	C	A	C	C	C	C	A	G	A	T	T	A	C	A	A	A	C	T	C	G	C	C	T	G	0	0	P	M
SEN_TH_180.2015	2015	T	A	T	T	G	C	G	A	T	T	C	G	C	A	C	C	C	A	C	G	A	T	T	G	0	0	P	M
SEN_TH_183.2015	2015	T	A	T	T	G	C	A	G	A	T	T	G	C	A	C	A	T	A	A	G	C	T	T	G	0	0	P	M
SEN_TH_184.2015	2015	T	A	C	T	C	C	A	G	T	C	T	A	C	A	C	A	C	A	C	G	C	T	T	G	0	0	P	M
SEN_TH_187.2015	2015	T	A	C	T	C	C	G	G	A	T	C	G	C	A	A	C	T	A	A	G	A	T	T	G	0	0	P	M
SEN_TH_188.2015	2015	C	A	T	T	G	G	A	G	A	T	C	G	C	A	C	C	C	A	A	G	C	T	T	G	0	0	P	M
SEN_TH_190.2015	2015	C	A	C	C	C	G	A	G	A	T	T	A	C	A	A	A	C	A	C	G	C	C	T	G	0	0	P	M
SEN_TH_191.2015	2015	T	A	C	T	C	C	G	G	A	T	T	G	T	A	C	A	T	A	A	G	A	T	T	G	0	0	P	M
SEN_TH_192.2015	2015	T	A	C	C	G	G	A	A	A	C	T	G	C	A	A	C	C	A	A	G	A	C	T	G	0	0	P	M
SEN_TH_193.2015	2015	T	A	C	T	C	G	G	G	A	T	C	A	C	A	A	C	T	A	A	A	C	T	T	G	0	0	P	M
SEN_TH_001.2016	2016	T	G	C	T	C	C	G	G	T	C	T	A	C	A	A	C	T	A	A	G	C	T	T	G	0	0	P	M
SEN_TH_003.2016	2016	T	A	C	T	C	C	A	G	T	C	T	A	C	A	A	C	C	A	C	G	A	T	T	G	0	0	P	M
SEN_TH_004.2016	2016	T	A	C	T	C	C	A	G	A	T	C	G	C	A	A	C	T	T	A	G	A	C	T	G	0	0	P	M
SEN_TH_005.2016	2016	T	A	T	T	C	G	G	G	A	T	T	A	T	A	A	A	T	T	A	G	C	C	T	G	0	0	P	M
SEN_TH_008.2016	2016	T	G	C	T	C	C	G	G	T	C	T	A	C	A	A	C	T	A	A	G	C	T	T	G	0	0	P	M
SEN_TH_013.2016	2016	C	A	C	T	C	C	G	A	T	T	T	A	T	A	C	A	T	A	A	A	A	T	T	G	0	0	P	M
SEN_TH_015.2016	2016	T	A	T	T	C	G	A	G	T	C	T	A	C	A	C	A	T	A	A	A	A	T	T	G	0	0	P	M
SEN_TH_016.2016	2016	T	A	T	T	G	C	A	A	A	C	T	G	C	C	C	C	C	T	A	A	C	T	T	G	0	0	P	M
SEN_TH_017.2016	2016	T	A	C	T	C	C	A	G	A	T	T	A	C	A	C	C	C	T	A	G	A	C	T	G	0	0	P	M
SEN_TH_023.2016	2016	C	A	C	T	G	G	A	G	A	T	C	A	C	A	C	C	C	T	A	G	C	T	T	G	0	0	P	M
SEN_TH_024.2016	2016	C	A	C	T	G	G	A	G	A	T	C	A	C	A	C	C	C	T	A	G	C	T	T	G	0	0	P	M
SEN_TH_026.2016	2016	T	A	C	T	G	C	A	G	T	T	T	A	T	C	C	C	T	T	C	G	C	T	T	G	0	0	P	M
SEN_TH_029.2016	2016	C	A	C	T	G	G	A	G	A	T	C	A	C	A	C	C	C	T	A	G	C	T	T	G	0	0	P	M
SEN_TH_031.2016	2016	C	A	C	C	C	G	A	G	A	T	T	A	C	A	A	A	C	A	C	G	C	C	T	G	0	0	P	M
SEN_TH_032.2016	2016	C	A	C	C	C	G	A	G	A	T	T	A	C	A	A	A	C	A	C	G	C	C	T	G	0	0	P	M
SEN_TH_034.2016	2016	T	A	C	C	G	C	A	A	A	C	C	A	C	A	C	C	T	A	A	A	A	T	T	G	0	0	P	M
SEN_TH_037.2016	2016	C	A	C	C	C	C	A	G	A	C	C	G	C	C	C	C	C	A	A	G	C	T	T	G	0	0	P	M
SEN_TH_039.2016	2016	C	A	C	C	C	G	A	G	A	T	T	A	C	A	A	A	C	A	C	G	C	C	T	G	0	0	P	M
SEN_TH_040.2016	2016	T	A	C	C	C	C	G	G	A	T	C	G	T	C	A	C	T	A	A	G	A	T	T	G	0	0	P	M
SEN_TH_043.2016	2016	C	A	C	T	G	G	A	G	A	T	C	A	C	A	C	C	C	T	A	G	C	T	T	G	0	0	P	M
SEN_TH_044.2016	2016	T	A	T	T	G	C	A	G	A	T	T	G	C	A	C	A	T	A	A	G	C	T	T	G	0	0	P	M
SEN_TH_047.2016	2016	C	A	C	T	C	C	A	G	A	T	C	G	C	A	C	A	C	A	C	G	C	T	T	G	0	0	P	M
SEN_TH_048.2016	2016	C	A	C	T	C	C	A	G	A	T	C	G	C	A	C	A	C	A	C	G	C	T	T	G	0	0	P	M
SEN_TH_054.2016	2016	T	A	T	C	C	C	A	G	A	T	C	A	T	A	A	C	C	A	C	G	A	C	T	G	0	0	P	M
SEN_TH_055.2016	2016	C	A	C	C	C	G	A	G	A	T	T	A	C	A	A	A	C	A	C	G	C	C	T	G	0	0	P	M
SEN_TH_057.2016	2016	T	A	C	T	C	C	A	G	T	C	T	A	C	A	C	A	C	A	C	G	C	T	T	G	0	0	P	M
SEN_TH_058.2016	2016	T	A	T	T	C	C	G	G	A	T	T	A	T	A	A	C	C	T	A	A	C	T	T	G	0	0	P	M
SEN_TH_059.2016	2016	T	A	T	T	G	G	A	G	A	T	T	A	T	A	A	C	C	A	C	G	C	C	T	G	0	0	P	M
SEN_TH_062.2016	2016	T	A	T	T	G	C	A	A	A	C	T	G	C	C	C	C	C	T	A	A	C	T	T	G	0	0	P	M
SEN_TH_065.2016	2016	C	A	C	T	C	C	A	G	A	T	C	G	C	A	C	A	C	A	C	G	C	T	T	G	0	0	P	M
SEN_TH_066.2016	2016	T	A	C	T	C	C	A	G	A	C	T	A	C	A	A	C	T	A	C	G	A	T	T	G	0	0	P	M
SEN_TH_074.2016	2016	T	A	C	T	C	C	A	G	T	C	T	A	C	A	C	A	C	A	C	G	C	T	T	G	0	0	P	M
SEN_TH_079.2016	2016	T	A	C	T	C	C	A	G	T	T	T	A	T	A	C	C	T	T	C	G	C	T	T	G	0	0	P	M
SEN_TH_089.2016	2016	T	A	C	T	C	C	G	G	A	C	T	G	C	C	C	C	T	A	A	A	A	C	T	G	0	0	P	M
SEN_TH_090.2016	2016	T	A	T	T	C	C	A	G	A	T	T	G	C	A	A	C	C	T	A	G	A	C	T	G	0	0	P	M
SEN_TH_091.2016	2016	T	A	T	T	C	C	G	G	A	T	T	A	T	A	A	C	C	T	A	A	C	T	T	G	0	0	P	M
SEN_TH_093.2016	2016	T	A	T	T	C	C	G	G	A	T	T	A	T	A	A	C	C	T	A	A	C	T	T	G	0	0	P	M
SEN_TH_094.2016	2016	T	A	T	T	C	C	G	G	A	T	T	A	T	A	A	C	C	T	A	A	C	T	T	G	0	0	P	M
SEN_TH_095.2016	2016	T	A	C	T	C	C	A	G	T	T	T	A	T	A	C	C	T	T	C	G	C	T	T	G	0	0	P	M
SEN_TH_097.2016	2016	C	A	C	T	C	C	A	G	A	T	T	G	C	A	A	C	C	T	A	G	A	T	T	G	0	0	P	M
SEN_TH_098.2016	2016	C	A	C	T	C	C	A	G	A	T	T	G	C	A	A	C	C	T	A	G	A	T	T	G	0	0	P	M
SEN_TH_100.2016	2016	T	A	C	T	C	C	A	G	A	T	C	G	C	C	A	C	T	T	A	G	A	T	T	G	0	0	P	M
SEN_TH_104.2016	2016	T	A	C	T	C	C	A	G	T	C	T	A	C	A	C	A	T	A	C	G	C	C	T	G	0	0	P	M
SEN_TH_105.2016	2016	T	A	C	T	C	C	A	G	T	C	T	A	C	A	C	A	T	A	C	G	C	C	T	G	0	0	P	M
SEN_TH_106.2016	2016	T	A	C	T	C	C	A	G	T	C	T	A	C	A	C	A	T	A	C	G	C	C	T	G	0	0	P	M
SEN_TH_107.2016	2016	C	A	C	T	C	C	G	G	T	C	C	G	T	A	A	A	C	T	A	A	C	C	T	G	0	0	P	M
SEN_TH_108.2016	2016	T	A	T	T	C	C	A	G	A	T	T	G	T	A	A	C	T	T	A	G	C	T	T	G	0	0	P	M
SEN_TH_110.2016	2016	T	A	C	T	G	C	A	G	T	T	T	G	C	A	C	C	T	A	A	G	C	T	T	G	0	0	P	M
SEN_TH_115.2016	2016	T	A	C	T	C	C	A	G	A	T	C	G	T	C	C	C	T	T	A	G	C	T	T	G	0	0	P	M
SEN_TH_119.2016	2016	T	A	T	T	C	C	A	G	A	C	T	A	C	A	A	A	C	A	A	G	C	C	T	G	0	0	P	M
SEN_TH_121.2016	2016	T	A	C	T	C	C	A	G	A	T	T	A	T	C	A	C	T	A	A	G	A	T	T	G	0	0	P	M
SEN_TH_124.2016	2016	T	A	C	T	C	G	A	G	T	T	T	A	T	A	C	C	C	A	A	A	C	C	T	G	0	0	P	M
SEN_TH_128.2016	2016	C	A	C	T	G	G	A	G	A	T	C	A	C	A	C	C	C	T	A	G	C	T	T	G	0	0	P	M
SEN_TH_129.2016	2016	C	A	C	T	G	G	A	G	A	T	C	A	C	A	C	C	C	T	A	G	C	T	T	G	0	0	P	M
SEN_TH_130.2016	2016	T	G	C	T	C	G	A	G	A	T	T	G	C	C	C	C	C	A	C	G	A	T	T	G	0	0	P	M
SEN_TH_131.2016	2016	T	A	C	T	C	G	A	G	A	T	C	G	T	C	C	C	C	T	A	G	C	T	T	G	0	0	P	M
SEN_TH_132.2016	2016	T	A	T	C	C	C	A	G	A	T	C	A	C	A	C	A	C	A	A	A	A	T	T	G	0	0	P	M
SEN_TH_134.2016	2016	T	A	C	C	C	G	A	G	T	C	T	A	C	A	C	A	C	A	C	G	C	T	T	G	0	0	P	M
SEN_TH_136.2016	2016	T	A	C	T	G	C	A	A	A	C	T	G	C	C	C	C	C	T	A	A	C	T	T	G	0	0	P	M
SEN_TH_137.2016	2016	T	A	C	T	C	C	G	G	A	C	T	G	C	C	C	C	T	A	A	A	A	C	T	G	0	0	P	M
SEN_TH_138.2016	2016	C	A	T	T	G	C	A	G	A	C	T	G	C	A	C	C	C	A	A	G	C	C	T	G	0	0	P	M
SEN_TH_139.2016	2016	T	A	C	T	C	C	G	G	A	T	T	A	T	C	C	C	T	T	A	A	A	T	T	G	0	0	P	M
SEN_TH_140.2016	2016	T	A	C	C	C	G	A	G	T	C	T	A	C	A	A	C	C	A	A	G	C	T	T	G	0	0	P	M
SEN_TH_078.2015_R1	2016	T	A	C	C	C	G	A	G	A	T	C	G	C	A	C	C	C	A	A	G	A	T	T	G	0	0	P	M
SEN_TH_120.2015_R1	2016	T	A	C	T	C	C	A	G	T	C	T	A	C	A	C	A	C	A	A	G	C	T	T	G	0	0	P	M
SEN_TH_151.2015_R1	2016	T	A	C	C	G	G	G	G	A	C	C	A	T	A	C	C	C	A	C	G	C	T	T	G	0	0	P	M
SEN_TH_001.2017	2017	T	A	C	T	C	C	G	G	T	T	C	A	C	C	C	C	T	A	A	G	A	C	T	G	0	0	P	M
SEN_TH_005.2017	2017	T	A	C	T	C	C	A	G	A	C	T	G	T	C	C	C	T	A	A	G	C	T	T	G	0	0	P	M
SEN_TH_006.2017	2017	T	A	C	T	C	C	G	G	A	C	C	A	C	A	C	C	C	A	C	G	A	T	T	G	0	0	P	M
SEN_TH_008.2017	2017	T	A	C	T	C	C	G	G	T	T	C	A	C	C	C	C	T	A	A	G	A	C	T	G	0	0	P	M
SEN_TH_011.2017	2017	T	A	C	T	C	C	G	G	T	T	C	A	C	C	C	C	T	A	A	G	A	C	T	G	0	0	P	M
SEN_TH_012.2017	2017	T	A	T	T	C	C	A	A	T	T	C	A	T	A	C	C	C	A	A	G	A	C	T	G	0	0	P	M
SEN_TH_014.2017	2017	T	A	C	T	C	G	A	G	T	C	C	A	C	C	C	C	T	T	C	G	A	T	T	G	0	0	P	M
SEN_TH_018.2017	2017	T	A	T	C	G	C	A	G	A	T	T	A	C	A	A	C	C	A	A	A	A	T	T	G	0	0	P	M
SEN_TH_020.2017	2017	T	A	C	C	C	C	G	G	T	C	C	A	C	C	A	A	T	A	A	G	A	C	T	G	0	0	P	M
SEN_TH_021.2017	2017	T	A	T	T	C	C	G	G	A	T	T	A	T	A	A	C	C	T	A	A	C	T	T	G	0	0	P	M
SEN_TH_026.2017	2017	C	A	T	T	C	C	A	G	A	T	C	G	C	A	C	C	C	A	A	A	C	T	T	G	0	0	P	M
SEN_TH_027.2017	2017	T	A	C	T	C	C	A	A	A	C	C	A	C	A	C	C	C	T	A	G	A	T	T	G	0	0	P	M
SEN_TH_028.2017	2017	T	A	C	T	C	C	A	A	A	C	C	A	C	A	C	C	C	T	A	G	A	T	T	G	0	0	P	M
SEN_TH_029.2017	2017	T	A	C	T	G	G	A	G	A	T	C	G	C	A	A	A	C	T	C	G	C	C	T	G	0	0	P	M
SEN_TH_030.2017	2017	T	A	C	T	C	C	A	G	T	C	T	A	C	A	C	C	T	T	C	G	A	C	T	G	0	0	P	M
SEN_TH_032.2017	2017	T	A	T	T	C	C	A	A	T	T	C	A	T	A	C	C	C	A	A	G	A	C	T	G	0	0	P	M
SEN_TH_035.2017	2017	T	A	C	C	C	C	G	G	A	T	C	G	T	C	A	C	T	A	A	G	A	T	T	G	0	0	P	M
SEN_TH_040.2017	2017	T	A	C	T	C	G	A	G	A	T	T	A	T	A	C	C	C	T	C	G	C	T	T	G	0	0	P	M
SEN_TH_041.2017	2017	T	A	C	T	C	C	A	G	T	T	C	G	C	C	A	C	C	A	A	G	A	T	T	G	0	0	P	M
SEN_TH_042.2017	2017	T	A	C	T	G	C	A	G	A	C	T	G	T	A	C	C	T	T	C	G	A	C	T	G	0	0	P	M
SEN_TH_043.2017	2017	T	A	C	T	C	G	A	G	T	T	C	G	T	A	C	C	E	T	C	A	C	C	T	G	0	0	P	M
SEN_TH_044.2017	2017	T	A	C	T	C	G	G	G	T	C	T	G	T	A	C	C	T	A	C	G	C	C	T	G	0	0	P	M
SEN_TH_045.2017	2017	C	A	C	T	C	C	A	G	A	C	T	A	C	C	A	C	C	A	A	G	C	C	T	G	0	0	P	M
SEN_TH_046.2017	2017	T	A	C	T	C	C	G	G	A	C	T	G	C	C	C	C	T	T	C	G	A	C	T	G	0	0	P	M
SEN_TH_048.2017	2017	T	A	C	C	C	C	G	G	A	C	T	A	C	A	C	C	T	T	A	G	A	T	T	G	0	0	P	M
SEN_TH_052.2017	2017	T	A	C	T	C	C	A	G	T	C	T	A	C	A	C	A	C	A	A	G	C	T	T	G	0	0	P	M
SEN_TH_053.2017	2017	T	A	C	T	C	C	A	G	T	C	T	A	C	A	C	A	C	A	A	G	C	T	T	G	0	0	P	M
SEN_TH_054.2017	2017	T	A	C	T	C	G	G	G	A	T	C	A	T	A	C	C	C	T	A	G	C	T	T	G	0	0	P	M
SEN_TH_055.2017	2017	T	A	C	T	C	C	A	G	T	C	T	A	C	A	C	A	C	A	A	G	C	T	T	G	0	0	P	M
SEN_TH_056.2017	2017	T	A	C	T	C	C	A	G	T	C	T	A	C	A	C	A	C	A	A	G	C	T	T	G	0	0	P	M
SEN_TH_057.2017	2017	T	A	T	T	C	C	G	G	A	T	T	A	T	A	A	C	C	T	A	A	C	T	T	G	0	0	P	M
SEN_TH_060.2017	2017	T	A	C	T	C	C	A	G	T	C	T	A	C	A	C	A	C	A	A	G	C	T	T	G	0	0	P	M
SEN_TH_061.2017	2017	T	A	C	T	C	C	A	G	T	C	T	A	C	A	C	A	C	A	A	G	C	T	T	G	0	0	P	M
SEN_TH_062.2017	2017	T	A	C	T	C	C	G	G	A	T	T	A	C	A	C	C	T	A	C	G	C	C	T	G	0	0	P	M
SEN_TH_063.2017	2017	T	A	C	T	G	G	A	G	A	T	C	G	C	A	A	A	C	T	C	G	C	C	T	G	0	0	P	M
SEN_TH_064.2017	2017	T	A	C	T	G	G	A	G	A	T	C	G	C	A	A	A	C	T	C	G	C	C	T	G	0	0	P	M
SEN_TH_065.2017	2017	T	A	C	T	C	C	A	G	T	C	T	A	C	C	C	C	C	A	A	A	C	T	T	G	0	0	P	M
SEN_TH_066.2017	2017	T	A	C	T	G	G	A	G	A	T	C	G	C	A	A	A	C	T	C	G	C	C	T	G	0	0	P	M
SEN_TH_068.2017	2017	T	A	C	T	G	C	A	G	A	C	T	A	T	A	C	C	C	T	C	G	A	T	T	G	0	0	P	M
SEN_TH_070.2017	2017	T	A	C	T	C	G	A	G	A	T	T	G	T	A	C	C	T	A	A	G	A	C	T	G	0	0	P	M
SEN_TH_071.2017	2017	C	A	T	C	C	C	G	G	A	T	C	G	C	A	C	C	C	T	A	G	C	C	T	G	0	0	P	M
SEN_TH_073.2017	2017	T	A	C	T	C	G	A	G	T	T	T	A	T	C	C	C	C	A	A	G	C	T	T	G	0	0	P	M
SEN_TH_075.2017	2017	T	A	C	T	C	G	A	G	A	T	T	G	T	A	C	C	T	A	A	G	A	C	T	G	0	0	P	M
SEN_TH_076.2017	2017	T	A	C	T	C	G	A	G	A	T	T	G	T	A	C	C	T	A	A	G	A	C	T	G	0	0	P	M
SEN_TH_077.2017	2017	T	A	C	T	C	G	A	G	A	T	T	G	T	A	C	C	T	A	A	G	A	C	T	G	0	0	P	M
SEN_TH_078.2017	2017	T	A	C	T	C	G	A	G	A	T	T	G	T	A	C	C	T	A	A	G	A	C	T	G	0	0	P	M
SEN_TH_079.2017	2017	T	A	C	T	C	G	A	G	A	T	T	G	T	A	C	C	T	A	A	G	A	C	T	G	0	0	P	M
SEN_TH_080.2017	2017	T	A	C	T	G	G	A	G	A	T	C	G	C	A	A	A	C	T	C	G	C	C	T	G	0	0	P	M
SEN_TH_085.2017	2017	T	A	C	T	C	G	A	G	T	T	T	A	C	A	C	C	C	A	A	G	C	T	T	G	0	0	P	M
SEN_TH_090.2017	2017	T	A	C	T	C	G	G	G	T	T	T	G	T	C	A	C	C	A	A	A	A	C	T	G	0	0	P	M
SEN_TH_091.2017	2017	T	A	C	T	C	G	G	G	T	T	T	G	T	C	A	C	C	A	A	A	A	C	T	G	0	0	P	M
SEN_TH_092.2017	2017	T	A	C	T	C	G	G	G	T	T	T	G	T	C	A	C	C	A	A	A	A	C	T	G	0	0	P	M
SEN_TH_093.2017	2017	T	A	C	T	C	G	G	G	T	T	T	G	T	C	A	C	C	A	A	A	A	C	T	G	0	0	P	M
SEN_TH_094.2017	2017	T	A	C	T	C	G	A	G	A	T	T	A	C	A	C	A	T	A	A	G	C	C	T	G	0	0	P	M
SEN_TH_095.2017	2017	T	A	C	T	C	G	G	G	T	T	T	G	C	C	C	C	T	T	A	G	C	C	T	G	0	0	P	M
SEN_TH_096.2017	2017	T	A	T	T	C	C	A	A	A	C	T	G	C	A	A	C	C	T	C	G	A	C	T	G	0	0	P	M
SEN_TH_099.2017	2017	C	A	C	T	C	C	A	G	A	C	C	G	T	A	C	C	C	A	C	G	A	C	T	G	0	0	P	M
SEN_TH_103.2017	2017	T	A	C	C	G	C	G	G	T	T	T	A	T	A	A	A	C	T	A	G	A	C	T	G	0	0	P	M
SEN_TH_106.2017	2017	T	A	C	T	C	G	G	G	A	T	T	A	C	A	C	C	C	A	A	G	C	T	T	G	0	0	P	M
SEN_TH_107.2017	2017	T	A	C	T	C	G	G	A	A	C	C	A	T	A	C	C	C	T	A	G	A	T	T	G	0	0	P	M
SEN_TH_109.2017	2017	T	A	C	T	C	C	G	G	A	C	T	G	C	A	C	C	C	T	A	A	A	C	T	G	0	0	P	M
SEN_TH_110.2017	2017	T	A	T	T	C	C	A	G	T	C	C	A	C	A	C	C	C	A	C	G	A	T	T	G	0	0	P	M
SEN_TH_111.2017	2017	C	A	C	T	C	C	G	G	T	C	C	A	C	C	A	C	C	T	A	G	A	T	T	G	0	0	P	M
SEN_TH_112.2017	2017	T	A	C	T	C	C	A	G	A	C	T	G	C	A	C	C	C	A	C	A	A	C	T	G	0	0	P	M
SEN_TH_115.2017	2017	T	A	C	T	C	C	A	G	A	C	C	G	T	A	C	C	T	T	A	G	A	T	T	G	0	0	P	M
SEN_TH_117.2017	2017	C	A	C	T	C	C	A	G	T	T	T	A	T	A	C	A	C	A	A	A	A	T	T	G	0	0	P	M
SEN_TH_118.2017	2017	T	A	C	T	C	C	G	G	A	C	T	A	C	A	A	C	C	A	A	A	A	T	T	G	0	0	P	M
SEN_TH_119.2017	2017	T	A	C	C	C	C	G	G	T	T	T	G	C	C	A	C	C	T	A	G	A	T	T	G	0	0	P	M
SEN_TH_120.2017	2017	C	A	C	T	G	C	A	G	A	T	C	G	C	A	C	A	T	T	A	G	A	T	T	G	0	0	P	M
SEN_TH_121.2017	2017	C	A	C	T	C	C	A	G	T	T	C	G	C	A	A	C	T	A	A	G	A	C	T	G	0	0	P	M
SEN_TH_122.2017	2017	C	A	C	T	C	C	G	G	A	T	T	G	T	A	A	C	C	A	A	G	A	C	T	G	0	0	P	M
SEN_TH_143.2006	2006	T	A	C	T	G	C	A	G	A	T	T	A	T	C	N	C	C	A	A	G	A	T	T	G	1	0	P	M
SEN_TH_153.2006	2006	N	A	C	T	G	C	A	A	A	T	C	G	C	A	C	A	T	T	A	G	A	T	T	G	1	0	P	M
SEN_TH_188.2006	2006	T	A	C	T	C	C	A	G	N	C	C	G	C	C	C	A	C	T	A	A	C	T	T	G	1	0	P	M
SEN_TH_003.2007	2007	T	A	C	T	C	G	G	G	A	C	C	N	T	C	A	A	T	A	A	G	C	T	T	G	1	0	P	M
SEN_TH_016.2007	2007	C	A	C	T	G	C	A	G	T	T	T	N	T	A	A	C	C	T	C	A	A	T	T	G	1	0	P	M
SEN_TH_029.2007	2007	T	A	C	T	C	C	A	G	A	C	N	G	C	A	A	C	T	T	A	G	A	T	T	G	1	0	P	M
SEN_TH_050.2007	2007	T	A	C	T	C	G	G	G	T	C	T	G	C	A	C	C	C	T	A	N	A	T	T	G	1	0	P	M
SEN_TH_127.2007	2007	T	A	C	T	C	C	G	G	A	C	N	A	C	A	C	C	C	A	C	G	A	T	T	G	1	0	P	M
SEN_TH_207.2007	2007	N	A	C	T	C	G	A	A	A	T	T	A	T	A	A	C	C	A	A	G	C	T	T	G	1	0	P	M
SEN_TH_177.2008	2008	T	A	C	T	G	C	G	G	N	C	T	G	C	A	C	C	T	A	C	G	C	T	T	G	1	0	P	M
SEN_TH_249.2008	2008	T	A	C	T	N	C	A	G	A	T	C	A	C	A	C	C	T	A	A	G	C	C	T	G	1	0	P	M
SEN_TH_111.2009	2009	C	A	C	T	C	N	G	G	T	C	T	A	C	A	A	C	C	T	A	G	A	C	T	G	1	0	P	M
SEN_TH_146.2010	2010	T	A	C	T	C	G	A	G	A	C	T	G	C	N	C	A	T	A	C	A	C	T	T	G	1	0	P	M
SEN_TH_147.2010	2010	T	A	C	T	C	G	A	G	A	C	T	G	C	N	C	A	T	A	C	A	C	T	T	G	1	0	P	M
SEN_TH_046.2010	2010	T	A	C	T	C	G	A	G	T	T	N	G	C	C	A	C	T	A	C	G	C	T	T	G	1	0	P	M
SEN_TH_136.2010	2010	C	A	C	T	C	C	A	G	A	T	C	A	C	C	A	C	N	T	C	A	C	T	T	G	1	0	P	M
SEN_TH_013.2011	2011	T	A	C	T	G	G	A	G	T	T	T	A	T	A	C	C	N	T	A	G	A	C	T	G	1	0	P	M
SEN_TH_023.2011	2011	T	A	C	T	C	C	A	G	N	T	T	A	C	A	A	C	C	T	A	G	C	C	T	G	1	0	P	M
SEN_TH_076.2011	2011	T	G	T	T	C	C	A	G	T	T	T	A	T	C	N	C	C	A	C	G	C	C	T	G	1	0	P	M
SEN_TH_115.2011	2011	C	A	N	T	G	C	G	A	T	C	T	G	C	A	A	C	C	T	A	A	A	C	T	G	1	0	P	M
SEN_TH_066.2012	2012	T	A	C	T	C	G	A	A	A	T	N	A	T	C	A	C	T	T	A	G	A	T	T	G	1	0	P	M
SEN_TH_090.2012	2012	T	A	C	T	C	C	A	G	N	T	C	G	C	A	C	C	C	A	A	G	C	C	T	G	1	0	P	M
SEN_TH_127.2012	2012	T	A	C	C	C	C	G	G	T	C	C	A	C	C	A	A	T	A	A	G	A	N	T	G	1	0	P	M
SEN_TH_141.2012	2012	T	A	T	N	C	C	A	G	T	C	C	A	C	C	C	A	T	A	A	G	A	C	T	G	1	0	P	M
SEN_TH_156.2012	2012	C	A	T	T	G	C	N	A	T	C	T	G	C	A	A	C	C	T	A	A	A	C	T	G	1	0	P	M
SEN_TH_191.2012	2012	T	A	C	C	C	C	A	G	A	T	T	A	C	A	A	C	N	T	A	A	A	C	T	G	1	0	P	M
SEN_TH_204.2012	2012	C	A	C	T	C	C	A	N	A	T	C	G	C	C	A	C	C	A	C	G	A	T	T	G	1	0	P	M
SEN_TH_225.2012	2012	T	A	C	T	C	C	G	G	A	C	C	A	C	C	A	A	T	T	N	G	A	T	T	G	1	0	P	M
SEN_TH_228.2012	2012	T	A	C	C	C	G	N	G	A	T	T	A	T	C	C	A	T	A	A	A	A	C	T	G	1	0	P	M
SEN_TH_235.2012	2012	C	A	C	T	C	C	A	N	A	T	C	G	T	A	C	C	T	T	A	G	C	C	T	G	1	0	P	M
SEN_TH_241.2012	2012	T	A	C	C	C	C	G	G	N	T	T	A	C	A	A	A	T	T	A	G	A	C	T	G	1	0	P	M
SEN_TH_255.2012	2012	C	A	C	T	C	C	A	G	A	T	T	G	T	A	A	C	C	N	A	G	C	T	T	G	1	0	P	M
SEN_TH_078.2013	2013	T	A	C	C	C	C	G	G	T	T	N	A	C	A	C	A	T	A	A	A	C	T	T	G	1	0	P	M
SEN_TH_125.2013	2013	C	A	C	T	C	C	A	G	T	C	C	A	C	C	A	C	N	T	A	G	A	T	T	G	1	0	P	M
SEN_TH_127.2013	2013	C	A	C	T	C	C	A	G	T	C	C	A	C	C	A	C	N	T	A	G	A	T	T	G	1	0	P	M
SEN_TH_013.2013	2013	T	A	C	T	C	C	G	G	A	C	N	G	C	C	C	C	C	T	A	A	A	C	T	G	1	0	P	M
SEN_TH_014.2013	2013	T	A	C	T	C	C	G	G	A	C	N	G	C	C	C	C	C	T	A	A	A	C	T	G	1	0	P	M
SEN_TH_263.2013	2013	T	A	C	T	G	G	G	G	T	T	T	A	T	C	N	C	T	T	A	G	A	T	T	G	1	0	P	M
SEN_TH_296.2013	2013	T	A	C	T	G	G	G	G	T	T	T	A	T	C	N	C	T	T	A	G	A	T	T	G	1	0	P	M
SEN_TH_038.2013	2013	C	A	C	C	C	G	A	A	T	C	T	G	C	A	C	C	C	T	A	A	C	N	T	G	1	0	P	M
SEN_TH_049.2013	2013	C	A	C	T	C	G	A	G	T	T	T	A	C	A	A	C	T	A	A	N	A	T	T	G	1	0	P	M
SEN_TH_077.2013	2013	T	A	T	C	C	G	A	G	A	T	N	G	C	A	C	C	C	A	A	G	A	T	T	G	1	0	P	M
SEN_TH_090.2013	2013	T	A	C	T	C	C	G	G	T	C	C	A	N	C	A	C	T	A	A	A	A	T	T	G	1	0	P	M
SEN_TH_093.2013	2013	C	A	C	T	C	G	A	G	T	T	T	A	C	A	A	N	T	A	A	G	A	T	T	G	1	0	P	M
SEN_TH_109.2013	2013	C	A	C	T	C	C	A	G	T	C	T	A	T	C	C	N	C	A	A	G	C	T	T	G	1	0	P	M
SEN_TH_117.2013	2013	T	A	T	T	G	C	A	G	A	T	T	G	C	A	C	N	C	T	A	G	C	T	T	G	1	0	P	M
SEN_TH_126.2013	2013	T	G	C	T	C	C	A	G	A	T	N	G	T	A	A	C	T	T	A	G	A	T	T	G	1	0	P	M
SEN_TH_129.2013	2013	T	A	C	T	C	C	N	A	A	C	T	A	T	C	C	A	T	T	A	G	A	T	T	G	1	0	P	M
SEN_TH_141.2013	2013	T	A	C	T	C	C	A	A	A	N	T	A	T	C	C	A	T	T	A	G	A	T	T	G	1	0	P	M
SEN_TH_144.2013	2013	T	A	C	T	C	C	A	A	A	C	T	A	T	C	C	N	T	T	A	G	A	T	T	G	1	0	P	M
SEN_TH_147.2013	2013	T	A	T	T	C	C	A	G	A	C	N	A	C	A	C	A	C	T	A	G	C	T	T	G	1	0	P	M
SEN_TH_153.2013	2013	C	A	C	C	C	G	A	G	A	N	T	G	T	A	C	C	C	A	A	A	C	T	T	G	1	0	P	M
SEN_TH_161.2013	2013	C	A	C	T	C	C	N	G	T	C	T	A	C	A	A	C	C	T	A	G	A	C	T	G	1	0	P	M
SEN_TH_164.2013	2013	T	G	C	T	G	G	G	G	T	T	T	A	T	A	N	C	T	T	A	G	A	C	T	G	1	0	P	M
SEN_TH_196.2013	2013	T	A	C	C	C	C	A	G	T	C	N	A	T	C	C	A	T	T	A	G	A	C	T	G	1	0	P	M
SEN_TH_215.2013	2013	C	A	C	T	C	C	G	G	T	C	C	A	C	C	A	C	C	A	A	N	A	T	T	G	1	0	P	M
SEN_TH_231.2013	2013	C	N	T	T	C	G	A	G	A	C	T	G	C	A	C	A	C	A	C	G	A	T	T	G	1	0	P	M
SEN_TH_285.2013	2013	C	A	T	C	G	C	A	G	T	T	C	G	T	A	A	C	N	T	A	G	A	C	T	G	1	0	P	M
SEN_TH_074.2014	2014	T	A	C	T	C	C	A	G	T	C	T	A	C	A	C	A	C	A	N	G	C	T	T	G	1	0	P	M
SEN_TH_111.2014	2014	T	A	C	T	C	C	A	G	T	C	T	A	C	A	C	A	C	A	N	G	C	T	T	G	1	0	P	M
SEN_TH_123.2014	2014	T	A	C	T	C	C	A	G	T	C	T	A	C	A	C	A	C	A	N	G	C	T	T	G	1	0	P	M
SEN_TH_136.2014	2014	T	A	C	T	C	C	A	G	T	C	T	A	C	A	C	A	C	A	N	G	C	T	T	G	1	0	P	M
SEN_TH_161.2014	2014	T	A	C	T	C	C	A	G	T	C	T	A	C	A	C	A	C	A	N	G	C	T	T	G	1	0	P	M
SEN_TH_086.2014	2014	T	A	C	T	C	C	G	G	A	C	N	G	C	C	A	C	C	A	A	G	A	C	T	G	1	0	P	M
SEN_TH_099.2014	2014	T	A	C	T	C	C	G	G	A	C	N	G	C	C	A	C	C	A	A	G	A	C	T	G	1	0	P	M
SEN_TH_151.2014	2014	T	A	C	T	C	C	G	G	A	C	N	G	C	C	A	C	C	A	A	G	A	C	T	G	1	0	P	M
SEN_TH_032.2014	2014	C	A	C	C	C	C	N	A	A	T	C	A	C	A	C	C	T	A	A	G	A	C	T	G	1	0	P	M
SEN_TH_040.2014	2014	T	G	C	T	C	C	A	G	A	T	N	G	C	C	A	C	C	T	C	G	C	T	T	G	1	0	P	M
SEN_TH_043.2014	2014	C	A	T	T	C	G	A	G	A	C	N	G	C	A	C	A	T	T	A	A	C	T	T	G	1	0	P	M
SEN_TH_068.2014	2014	C	A	N	T	C	G	A	G	T	T	T	A	C	A	A	C	T	A	A	G	A	T	T	G	1	0	P	M
SEN_TH_104.2014	2014	C	A	N	T	C	C	A	G	A	T	T	A	T	A	A	C	T	A	A	G	A	T	T	G	1	0	P	M
SEN_TH_122.2014	2014	C	A	C	T	C	G	A	G	T	T	T	A	C	A	A	C	N	A	A	G	A	T	T	G	1	0	P	M
SEN_TH_127.2014	2014	T	A	C	T	C	C	G	G	A	T	C	G	C	A	C	A	T	N	A	A	A	T	T	G	1	0	P	M
SEN_TH_145.2014	2014	T	A	C	T	C	G	G	A	T	T	N	G	C	C	C	C	T	A	A	G	C	T	T	G	1	0	P	M
SEN_TH_177.2014	2014	C	A	C	T	C	G	A	G	T	T	N	A	C	A	C	A	T	A	A	A	A	T	T	G	1	0	P	M
SEN_TH_197.2014	2014	T	A	C	T	C	C	A	G	T	C	N	G	C	C	A	C	C	T	A	G	C	T	T	G	1	0	P	M
SEN_TH_035.2015	2015	C	A	T	C	G	C	A	G	T	C	C	N	C	C	C	C	C	T	A	G	A	C	T	G	1	0	P	M
SEN_TH_172.2015	2015	T	A	C	T	G	C	A	G	N	T	T	G	T	A	C	C	C	T	C	G	A	C	T	G	1	0	P	M
SEN_TH_052.2016	2016	T	A	C	T	C	G	A	G	A	T	C	N	C	A	C	C	T	A	A	G	A	C	T	G	1	0	P	M
SEN_TH_053.2016	2016	T	A	T	T	G	C	A	A	A	C	T	N	C	C	C	C	C	T	A	A	C	T	T	G	1	0	P	M
SEN_TH_072.2016	2016	C	A	T	T	G	G	G	G	N	C	T	G	C	A	C	C	T	T	A	G	A	C	T	G	1	0	P	M
SEN_TH_118.2016	2016	T	A	C	T	C	N	A	G	A	T	C	G	T	C	C	C	C	T	A	G	C	T	T	G	1	0	P	M
SEN_TH_010.2017	2017	T	A	C	T	C	C	G	G	T	N	C	A	C	C	C	C	T	A	A	G	A	C	T	G	1	0	P	M
SEN_TH_034.2017	2017	T	A	C	T	C	N	A	G	A	C	T	G	C	A	A	C	T	T	A	G	C	T	T	G	1	0	P	M
SEN_TH_051.2017	2017	T	A	C	T	G	N	A	G	A	T	T	G	T	A	A	A	C	A	A	G	C	T	T	G	1	0	P	M
SEN_TH_104.2017	2017	C	A	C	C	C	C	G	G	A	T	C	G	T	C	N	C	C	A	A	G	A	C	T	G	1	0	P	M
SEN_TH_126.2006	2006	C	A	C	T	C	C	A	G	T	C	X	A	C	A	A	A	T	A	C	G	C	T	T	G	0	1	P	M
SEN_TH_025.2006	2006	T	A	C	T	C	G	A	A	T	C	X	A	C	C	A	C	C	A	A	G	A	T	T	G	0	1	P	M
SEN_TH_047.2006	2006	C	A	C	T	C	G	G	G	T	C	X	A	C	A	A	C	C	T	A	G	A	C	T	G	0	1	P	M
SEN_TH_066.2006	2006	T	A	C	T	C	C	A	G	A	C	X	G	C	A	A	C	T	T	C	G	C	T	T	G	0	1	P	M
SEN_TH_085.2006	2006	T	A	C	T	C	C	A	G	T	C	X	A	C	C	C	A	T	A	C	G	C	C	T	G	0	1	P	M
SEN_TH_123.2006	2006	T	A	C	T	C	C	G	G	A	T	X	G	C	A	A	C	T	T	A	G	C	C	T	G	0	1	P	M
SEN_TH_131.2006	2006	C	A	X	T	G	C	G	A	A	T	T	G	C	A	A	C	T	T	A	G	A	T	T	G	0	1	P	M
SEN_TH_185.2006	2006	T	A	T	T	C	G	A	A	A	T	X	G	T	A	C	C	T	T	C	G	A	C	T	G	0	1	P	M
SEN_TH_214.2006	2006	T	A	C	T	G	C	A	G	T	C	X	A	T	C	C	C	C	T	A	G	C	T	T	G	0	1	P	M
SEN_TH_235.2006	2006	T	A	C	T	C	C	G	G	T	C	X	G	T	A	C	C	T	A	C	G	C	T	T	G	0	1	P	M
SEN_TH_083.2007	2007	C	A	C	T	C	C	A	G	T	C	X	A	C	A	A	A	T	A	C	G	C	T	T	G	0	1	P	M
SEN_TH_187.2007	2007	T	A	C	T	C	C	G	G	A	C	X	G	C	C	C	C	C	A	A	G	A	T	T	G	0	1	P	M
SEN_TH_191.2007	2007	T	A	C	T	C	C	G	G	A	C	X	G	C	C	C	C	C	A	A	G	A	T	T	G	0	1	P	M
SEN_TH_112.2007	2007	T	A	C	T	G	G	A	G	A	T	X	A	T	A	C	C	T	A	C	G	A	T	T	G	0	1	P	M
SEN_TH_113.2007	2007	T	A	C	T	G	G	A	G	A	T	X	A	T	A	C	C	T	A	C	G	A	T	T	G	0	1	P	M
SEN_TH_195.2007	2007	T	A	C	C	G	C	G	G	A	T	X	G	C	A	A	C	C	A	A	G	A	C	T	G	0	1	P	M
SEN_TH_196.2007	2007	T	A	C	C	G	C	G	G	A	T	X	G	C	A	A	C	C	A	A	G	A	C	T	G	0	1	P	M
SEN_TH_116.2007	2007	T	A	C	C	C	C	A	G	A	C	X	G	T	C	C	C	C	T	A	G	C	T	T	G	0	1	P	M
SEN_TH_138.2007	2007	T	A	C	C	C	C	A	G	A	C	X	G	T	C	C	C	C	T	A	G	C	T	T	G	0	1	P	M
SEN_TH_122.2007	2007	T	A	C	T	G	C	A	A	A	T	X	G	T	A	C	C	C	A	A	G	A	C	T	G	0	1	P	M
SEN_TH_163.2007	2007	T	A	C	T	G	C	A	A	A	T	X	G	T	A	C	C	C	A	A	G	A	C	T	G	0	1	P	M
SEN_TH_179.2007	2007	T	A	C	T	G	C	A	A	A	T	X	G	T	A	C	C	C	A	A	G	A	C	T	G	0	1	P	M
SEN_TH_001.2007	2007	T	A	C	T	C	C	A	G	A	T	X	A	C	C	C	C	C	A	C	G	A	C	T	G	0	1	P	M
SEN_TH_009.2007	2007	T	A	C	T	C	C	A	G	T	C	X	A	C	C	A	A	T	T	A	A	A	T	T	G	0	1	P	M
SEN_TH_014.2007	2007	C	G	C	T	C	G	G	G	A	T	X	G	T	A	C	A	C	A	C	G	C	T	T	G	0	1	P	M
SEN_TH_017.2007	2007	T	A	C	C	C	C	A	G	A	C	X	A	C	A	C	C	C	T	C	G	A	T	T	G	0	1	P	M
SEN_TH_019.2007	2007	T	A	C	T	C	C	A	A	A	C	X	G	T	A	C	C	T	A	A	G	A	C	T	G	0	1	P	M
SEN_TH_020.2007	2007	T	A	C	T	G	C	A	G	A	C	X	A	C	A	C	A	T	T	A	G	C	T	T	G	0	1	P	M
SEN_TH_060.2007	2007	T	A	C	T	C	G	A	G	A	C	X	A	T	A	A	C	C	A	A	A	C	T	T	G	0	1	P	M
SEN_TH_062.2007	2007	T	A	C	C	C	G	A	G	A	X	C	A	C	C	A	C	C	A	A	G	C	T	T	G	0	1	P	M
SEN_TH_063.2007	2007	T	A	C	T	C	C	A	G	A	C	X	G	C	C	A	C	C	A	C	G	A	T	T	G	0	1	P	M
SEN_TH_072.2007	2007	C	A	C	T	C	C	G	G	X	C	C	G	T	C	A	C	T	A	A	G	C	T	T	G	0	1	P	M
SEN_TH_073.2007	2007	T	A	T	T	G	G	G	G	A	C	X	G	T	A	C	C	C	T	A	G	C	T	T	G	0	1	P	M
SEN_TH_093.2007	2007	T	A	C	T	C	C	G	G	T	C	C	G	T	A	C	C	T	A	A	G	A	X	T	G	0	1	P	M
SEN_TH_114.2007	2007	T	A	T	T	G	G	G	G	A	T	X	A	C	C	A	C	C	A	C	G	A	T	T	G	0	1	P	M
SEN_TH_130.2007	2007	T	A	C	T	C	G	A	G	T	C	X	G	T	A	C	C	C	A	C	G	A	C	T	G	0	1	P	M
SEN_TH_135.2007	2007	T	A	C	T	G	C	G	G	A	T	T	X	T	A	C	A	C	A	A	G	C	C	T	G	0	1	P	M
SEN_TH_136.2007	2007	T	A	C	T	C	C	A	G	A	T	X	G	C	A	C	A	C	A	C	G	A	C	T	G	0	1	P	M
SEN_TH_170.2007	2007	T	A	T	T	C	C	A	A	A	T	X	G	T	A	C	C	C	T	A	G	A	C	T	G	0	1	P	M
SEN_TH_174.2007	2007	T	A	C	T	C	C	A	G	A	C	X	G	T	A	C	C	C	T	A	G	C	C	T	G	0	1	P	M
SEN_TH_180.2007	2007	T	A	C	T	C	C	G	G	A	T	X	A	T	A	A	C	C	A	A	G	A	T	T	G	0	1	P	M
SEN_TH_183.2007	2007	T	A	C	T	G	C	A	G	A	T	C	X	C	A	A	C	T	A	A	G	C	C	T	G	0	1	P	M
SEN_TH_190.2007	2007	C	A	C	C	G	C	G	G	A	T	X	A	C	A	A	C	T	T	C	G	C	T	T	G	0	1	P	M
SEN_TH_198.2007	2007	C	A	C	T	G	C	G	G	T	C	X	A	C	C	C	C	C	A	A	G	A	C	T	G	0	1	P	M
SEN_TH_204.2007	2007	C	A	C	T	C	C	A	G	A	T	X	G	C	A	A	C	C	T	C	A	A	C	T	G	0	1	P	M
SEN_TH_211.2007	2007	C	A	T	C	G	G	G	G	A	T	X	G	C	A	C	C	T	A	A	A	A	T	T	G	0	1	P	M
SEN_TH_216.2007	2007	T	A	C	C	C	C	G	G	A	T	X	G	C	A	C	A	C	A	C	G	A	T	T	G	0	1	P	M
SEN_TH_218.2007	2007	C	A	T	T	C	G	A	G	A	T	X	A	C	A	C	A	C	A	A	G	C	C	T	G	0	1	P	M
SEN_TH_004.2008	2008	T	A	C	T	C	C	G	G	T	T	X	G	C	A	C	A	C	A	C	G	A	C	T	G	0	1	P	M
SEN_TH_014.2008	2008	T	A	C	T	C	C	G	G	T	T	X	G	C	A	C	A	C	A	C	G	A	C	T	G	0	1	P	M
SEN_TH_023.2008	2008	T	A	C	T	C	C	G	G	T	T	X	G	C	A	C	A	C	A	C	G	A	C	T	G	0	1	P	M
SEN_TH_036.2008	2008	T	A	C	T	C	C	G	G	T	T	X	G	C	A	C	A	C	A	C	G	A	C	T	G	0	1	P	M
SEN_TH_068.2008	2008	T	A	C	T	C	C	G	G	T	T	X	G	C	A	C	A	C	A	C	G	A	C	T	G	0	1	P	M
SEN_TH_088.2008	2008	T	A	C	T	C	C	G	G	T	T	X	G	C	A	C	A	C	A	C	G	A	C	T	G	0	1	P	M
SEN_TH_095.2008	2008	T	A	C	T	C	C	G	G	T	T	X	G	C	A	C	A	C	A	C	G	A	C	T	G	0	1	P	M
SEN_TH_112.2008	2008	T	A	C	T	C	C	G	G	T	T	X	G	C	A	C	A	C	A	C	G	A	C	T	G	0	1	P	M
SEN_TH_120.2008	2008	T	A	C	T	C	C	G	G	T	T	X	G	C	A	C	A	C	A	C	G	A	C	T	G	0	1	P	M
SEN_TH_173.2008	2008	T	A	C	T	C	C	G	G	T	T	X	G	C	A	C	A	C	A	C	G	A	C	T	G	0	1	P	M
SEN_TH_188.2008	2008	T	A	C	T	C	C	G	G	T	T	X	G	C	A	C	A	C	A	C	G	A	C	T	G	0	1	P	M
SEN_TH_214.2008	2008	T	A	C	T	C	C	G	G	T	T	X	G	C	A	C	A	C	A	C	G	A	C	T	G	0	1	P	M
SEN_TH_216.2008	2008	T	A	C	T	C	C	G	G	T	T	X	G	C	A	C	A	C	A	C	G	A	C	T	G	0	1	P	M
SEN_TH_217.2008	2008	T	A	C	T	C	C	G	G	T	T	X	G	C	A	C	A	C	A	C	G	A	C	T	G	0	1	P	M
SEN_TH_228.2008	2008	T	A	C	T	C	C	G	G	T	T	X	G	C	A	C	A	C	A	C	G	A	C	T	G	0	1	P	M
SEN_TH_072.2008	2008	T	A	C	T	C	C	A	G	A	T	X	G	T	A	A	C	T	A	C	G	A	T	T	G	0	1	P	M
SEN_TH_092.2008	2008	T	A	C	C	C	C	G	G	T	C	X	A	C	A	A	C	C	T	A	G	C	T	T	G	0	1	P	M
SEN_TH_104.2008	2008	T	A	C	T	C	G	G	G	A	T	X	G	T	A	C	C	T	T	A	G	C	T	T	G	0	1	P	M
SEN_TH_151.2008	2008	C	A	C	C	C	C	G	G	A	T	X	G	C	A	C	C	T	T	A	G	C	T	T	G	0	1	P	M
SEN_TH_175.2008	2008	C	A	T	T	G	G	A	G	A	C	X	G	T	A	C	A	C	T	C	G	A	T	T	G	0	1	P	M
SEN_TH_220.2008	2008	T	A	C	T	C	C	G	G	T	T	X	G	C	A	C	C	C	A	C	G	A	C	T	G	0	1	P	M
SEN_TH_223.2008	2008	C	A	C	T	C	C	A	G	T	T	C	X	C	C	C	C	T	T	C	G	C	C	T	G	0	1	P	M
SEN_TH_224.2008	2008	C	A	C	T	C	C	A	G	T	T	X	G	C	C	C	C	T	T	C	G	C	C	T	G	0	1	P	M
SEN_TH_227.2008	2008	T	A	T	T	C	G	A	G	T	C	X	A	C	A	C	C	T	T	A	G	C	C	T	G	0	1	P	M
SEN_TH_230.2008	2008	T	A	C	T	C	G	G	A	A	T	X	G	C	A	C	A	C	A	A	A	A	C	T	G	0	1	P	M
SEN_TH_108.2009	2009	T	A	C	T	C	C	G	G	T	T	X	G	C	A	C	A	C	A	C	G	A	C	T	G	0	1	P	M
SEN_TH_109.2009	2009	T	A	C	T	C	C	G	G	T	T	X	G	C	A	C	A	C	A	C	G	A	C	T	G	0	1	P	M
SEN_TH_153.2009	2009	T	A	C	T	C	C	G	G	T	T	X	G	C	A	C	A	C	A	C	G	A	C	T	G	0	1	P	M
SEN_TH_056.2009	2009	C	A	C	T	C	G	A	G	T	T	X	A	C	A	A	C	C	T	A	G	C	C	T	G	0	1	P	M
SEN_TH_058.2009	2009	C	A	C	T	C	G	A	G	T	T	X	A	C	A	A	C	C	T	A	G	C	C	T	G	0	1	P	M
SEN_TH_061.2009	2009	C	A	C	T	C	G	A	G	T	T	X	A	C	A	A	C	C	T	A	G	C	C	T	G	0	1	P	M
SEN_TH_072.2009	2009	C	A	C	T	C	G	A	G	T	T	X	A	C	A	A	C	C	T	A	G	C	C	T	G	0	1	P	M
SEN_TH_010.2009	2009	T	A	C	T	G	G	A	A	A	C	X	A	C	A	C	C	T	A	A	A	C	C	T	G	0	1	P	M
SEN_TH_015.2009	2009	T	A	T	C	G	C	A	A	A	T	X	G	T	C	A	C	T	T	C	G	A	T	T	G	0	1	P	M
SEN_TH_022.2009	2009	T	A	C	T	C	G	G	G	A	T	X	G	T	A	C	C	C	A	A	G	C	C	T	G	0	1	P	M
SEN_TH_037.2009	2009	C	A	T	T	C	G	A	G	T	T	X	G	C	A	C	C	T	T	A	G	C	T	T	G	0	1	P	M
SEN_TH_054.2009	2009	T	A	T	T	C	G	A	G	A	T	X	G	T	C	A	C	T	A	A	G	A	T	T	G	0	1	P	M
SEN_TH_064.2009	2009	T	A	T	T	G	G	A	A	A	T	X	A	T	A	A	C	C	T	A	G	C	C	T	G	0	1	P	M
SEN_TH_082.2009	2009	C	A	X	T	C	C	A	G	A	C	T	A	T	A	C	C	C	T	A	G	C	C	T	G	0	1	P	M
SEN_TH_086.2009	2009	T	A	C	T	C	C	G	G	A	T	X	A	T	A	C	C	C	A	C	G	A	T	T	G	0	1	P	M
SEN_TH_091.2009	2009	C	A	C	T	C	C	A	G	A	T	X	A	C	A	A	A	C	A	C	G	C	T	T	G	0	1	P	M
SEN_TH_110.2009	2009	T	A	C	T	C	C	A	G	T	T	X	G	C	A	A	C	C	T	A	G	C	C	T	G	0	1	P	M
SEN_TH_147.2009	2009	T	A	C	T	C	C	A	G	T	C	X	A	C	C	C	C	T	A	A	G	A	T	T	G	0	1	P	M
SEN_TH_166.2009	2009	T	A	C	T	C	C	A	G	A	C	X	A	C	A	C	C	T	A	A	G	A	C	T	G	0	1	P	M
SEN_TH_172.2009	2009	T	A	C	T	C	C	A	G	T	C	X	G	C	A	A	A	T	A	C	G	C	T	T	G	0	1	P	M
SEN_TH_176.2010	2010	T	A	C	T	C	G	A	A	A	C	T	X	C	C	C	A	T	A	A	G	C	T	T	G	0	1	P	M
SEN_TH_108.2010	2010	T	A	T	T	C	C	A	G	A	T	X	G	C	A	A	C	T	T	C	G	A	C	T	G	0	1	P	M
SEN_TH_149.2010	2010	T	A	T	T	C	C	A	G	A	T	X	G	C	A	A	C	T	T	C	G	A	C	T	G	0	1	P	M
SEN_TH_027.2010	2010	T	A	C	T	C	G	A	G	A	T	X	A	T	A	C	A	T	A	C	A	C	T	T	G	0	1	P	M
SEN_TH_036.2010	2010	T	A	C	T	C	G	A	G	A	T	X	A	T	A	C	A	T	A	C	A	C	T	T	G	0	1	P	M
SEN_TH_095.2010	2010	T	A	C	T	C	G	A	G	A	T	X	A	T	A	C	A	T	A	C	A	C	T	T	G	0	1	P	M
SEN_TH_134.2010	2010	T	A	C	T	C	G	A	G	A	T	X	A	T	A	C	A	T	A	C	A	C	T	T	G	0	1	P	M
SEN_TH_163.2010	2010	T	A	C	T	C	G	A	G	A	T	X	A	T	A	C	A	T	A	C	A	C	T	T	G	0	1	P	M
SEN_TH_003.2010	2010	T	A	C	T	C	C	A	G	T	C	X	A	T	A	A	C	T	A	C	G	C	T	T	G	0	1	P	M
SEN_TH_021.2010	2010	T	A	C	C	C	C	G	G	T	C	X	A	C	A	C	C	T	T	A	A	C	T	T	G	0	1	P	M
SEN_TH_022.2010	2010	C	G	C	T	C	G	G	G	A	C	X	G	C	A	C	C	T	A	A	A	A	T	T	G	0	1	P	M
SEN_TH_024.2010	2010	T	A	T	C	C	C	A	G	A	C	X	G	C	A	C	C	T	A	A	A	A	C	T	G	0	1	P	M
SEN_TH_028.2010	2010	T	A	C	C	C	G	G	G	A	T	X	A	T	C	C	C	T	A	A	G	A	T	T	G	0	1	P	M
SEN_TH_074.2010	2010	T	A	C	T	G	C	G	G	A	T	X	G	T	A	A	C	C	T	A	A	A	C	T	G	0	1	P	M
SEN_TH_128.2010	2010	T	A	C	C	X	C	G	G	T	C	C	A	C	C	A	A	T	A	A	G	A	C	T	G	0	1	P	M
SEN_TH_172.2010	2010	X	A	C	T	C	G	A	G	A	T	C	G	C	C	C	A	C	A	C	G	A	T	T	G	0	1	P	M
SEN_TH_175.2010	2010	T	A	T	C	C	G	A	G	T	C	X	A	C	C	C	C	T	T	A	G	C	C	T	G	0	1	P	M
SEN_TH_183.2010	2010	T	A	C	C	G	G	A	G	A	T	X	G	C	A	A	C	T	A	A	G	A	C	T	G	0	1	P	M
SEN_TH_184.2010	2010	C	A	T	T	C	C	A	G	T	T	X	G	T	C	C	A	T	A	A	G	C	T	T	G	0	1	P	M
SEN_TH_118.2011	2011	T	A	T	T	C	C	G	G	A	C	X	A	C	A	C	A	C	T	A	G	C	T	T	G	0	1	P	M
SEN_TH_131.2011	2011	T	A	T	T	C	C	G	G	A	C	X	A	C	A	C	A	C	T	A	G	C	T	T	G	0	1	P	M
SEN_TH_001.2011	2011	C	A	X	T	G	C	G	A	T	C	T	G	C	A	A	C	C	T	A	A	A	C	T	G	0	1	P	M
SEN_TH_006.2011	2011	T	A	T	T	G	C	G	G	A	T	X	G	C	C	C	C	C	A	A	A	A	C	T	G	0	1	P	M
SEN_TH_012.2011	2011	T	A	C	C	C	G	G	G	T	C	X	A	C	A	C	A	T	A	C	G	A	C	T	G	0	1	P	M
SEN_TH_016.2011	2011	T	A	C	C	C	C	G	G	T	C	X	A	C	C	A	A	T	A	A	A	A	C	T	G	0	1	P	M
SEN_TH_022.2011	2011	T	A	C	C	C	C	G	G	T	T	X	A	C	C	A	A	T	A	A	G	A	C	T	G	0	1	P	M
SEN_TH_025.2011	2011	C	A	T	T	C	C	A	G	T	C	X	G	C	C	C	A	T	T	A	G	A	T	T	G	0	1	P	M
SEN_TH_033.2011	2011	C	A	C	T	C	C	A	G	A	T	X	A	C	C	A	C	C	T	C	A	A	C	T	G	0	1	P	M
SEN_TH_039.2011	2011	C	A	T	T	C	C	G	G	A	T	X	G	T	C	C	C	T	T	A	G	A	T	T	G	0	1	P	M
SEN_TH_058.2011	2011	C	A	C	T	C	G	A	G	A	T	X	G	C	A	A	C	T	A	C	G	C	C	T	G	0	1	P	M
SEN_TH_059.2011	2011	T	A	C	C	C	C	G	G	A	C	X	A	C	C	A	A	T	A	A	G	A	C	T	G	0	1	P	M
SEN_TH_090.2011	2011	T	A	C	C	C	C	G	G	A	T	X	A	T	A	C	A	T	A	A	A	C	T	T	G	0	1	P	M
SEN_TH_097.2011	2011	T	A	T	T	C	G	A	G	T	C	X	A	C	A	C	C	T	T	C	A	C	T	T	G	0	1	P	M
SEN_TH_143.2011	2011	T	A	T	T	C	C	A	G	A	T	X	G	C	A	A	C	T	T	C	G	A	C	T	G	0	1	P	M
SEN_TH_149.2011	2011	T	A	C	C	C	G	A	G	A	C	X	G	T	A	A	C	C	A	C	G	A	T	T	G	0	1	P	M
SEN_TH_077.2012	2012	T	A	C	T	C	G	A	A	A	C	T	X	C	C	C	A	T	A	A	G	C	T	T	G	0	1	P	M
SEN_TH_068.2012	2012	C	A	T	T	C	C	A	G	T	C	C	X	C	C	C	A	T	T	A	G	A	T	T	G	0	1	P	M
SEN_TH_219.2012	2012	C	A	T	T	C	C	A	G	T	C	C	X	C	C	C	A	T	T	A	G	A	T	T	G	0	1	P	M
SEN_TH_262.2012	2012	C	A	T	T	C	C	A	G	T	C	C	X	C	C	C	A	T	T	A	G	A	T	T	G	0	1	P	M
SEN_TH_251.2012	2012	C	A	C	T	C	G	G	G	A	T	T	X	C	C	A	C	T	A	A	G	A	T	T	G	0	1	P	M
SEN_TH_001.2012	2012	T	A	C	T	G	G	A	G	T	T	T	A	T	A	C	C	T	T	A	G	A	C	X	G	0	1	P	M
SEN_TH_039.2012	2012	C	A	C	T	C	G	G	G	A	T	T	X	C	C	A	C	T	A	A	G	C	T	T	G	0	1	P	M
SEN_TH_116.2012	2012	C	A	C	T	C	G	G	G	A	T	T	X	C	C	A	C	T	A	A	G	C	T	T	G	0	1	P	M
SEN_TH_146.2012	2012	C	A	T	T	C	C	A	G	T	C	C	X	C	C	A	A	T	A	A	G	A	T	T	G	0	1	P	M
SEN_TH_190.2012	2012	C	A	T	T	C	C	A	G	T	C	C	X	C	C	A	A	T	A	A	G	A	T	T	G	0	1	P	M
SEN_TH_247.2012	2012	C	A	T	T	C	C	A	G	T	C	C	X	C	C	A	A	T	A	A	G	A	T	T	G	0	1	P	M
SEN_TH_249.2012	2012	C	A	T	T	C	C	A	G	T	C	C	X	C	C	A	A	T	A	A	G	A	T	T	G	0	1	P	M
SEN_TH_112.2012	2012	C	A	C	T	C	G	A	A	A	T	T	X	C	C	A	C	T	A	A	G	C	T	T	G	0	1	P	M
SEN_TH_026.2012	2012	T	A	C	T	C	C	G	G	A	T	T	X	C	C	C	C	C	A	A	G	A	T	T	G	0	1	P	M
SEN_TH_040.2012	2012	T	A	C	C	C	C	G	G	T	C	X	A	C	A	C	A	T	A	A	G	A	T	T	G	0	1	P	M
SEN_TH_074.2012	2012	T	A	C	T	C	G	A	G	A	C	X	G	C	C	C	C	C	T	A	G	A	C	T	G	0	1	P	M
SEN_TH_076.2012	2012	T	A	C	T	C	C	G	G	X	T	C	G	C	A	C	C	C	T	A	G	A	T	T	G	0	1	P	M
SEN_TH_079.2012	2012	T	A	T	C	C	C	A	G	A	T	X	G	C	C	C	C	C	T	A	G	A	T	T	G	0	1	P	M
SEN_TH_109.2012	2012	T	A	X	C	G	C	A	G	T	C	C	G	T	A	C	C	T	T	A	G	A	C	T	G	0	1	P	M
SEN_TH_153.2012	2012	C	A	C	T	C	X	A	G	T	T	T	G	C	A	C	C	T	A	A	G	C	T	T	G	0	1	P	M
SEN_TH_163.2012	2012	C	A	T	T	C	G	A	G	A	C	X	G	C	A	C	C	C	T	C	G	A	C	T	G	0	1	P	M
SEN_TH_180.2012	2012	C	A	C	C	C	G	A	A	A	C	T	X	C	C	C	C	C	T	A	G	C	C	T	G	0	1	P	M
SEN_TH_181.2012	2012	T	A	C	T	C	C	A	A	A	T	X	A	T	C	C	A	T	T	C	G	C	T	T	G	0	1	P	M
SEN_TH_198.2012	2012	T	A	C	T	C	G	G	G	T	C	X	A	T	A	A	A	T	A	A	G	A	C	T	G	0	1	P	M
SEN_TH_208.2012	2012	T	A	C	T	C	G	A	A	A	T	X	A	T	A	C	A	T	A	C	A	C	T	T	G	0	1	P	M
SEN_TH_224.2012	2012	T	A	C	C	C	C	G	G	A	T	X	A	T	A	A	A	C	A	A	G	A	T	T	G	0	1	P	M
SEN_TH_238.2012	2012	T	A	C	T	C	C	A	G	T	C	X	A	C	A	C	C	T	A	A	G	A	C	T	G	0	1	P	M
SEN_TH_254.2012	2012	C	A	T	C	C	C	G	G	T	C	C	X	C	C	A	C	T	T	A	G	A	T	T	G	0	1	P	M
SEN_TH_270.2012	2012	T	A	C	T	C	G	A	G	T	T	X	G	C	C	A	C	T	A	C	G	C	T	T	G	0	1	P	M
SEN_TH_272.2012	2012	T	A	X	T	G	G	A	G	T	C	C	G	T	A	C	C	T	T	A	G	C	T	T	G	0	1	P	M
SEN_TH_276.2012	2012	C	A	C	T	C	C	G	G	T	C	C	X	C	C	C	C	T	A	A	G	C	T	T	G	0	1	P	M
SEN_TH_290.2012	2012	C	A	C	T	C	C	A	G	A	T	T	X	C	C	A	C	T	T	A	G	A	T	T	G	0	1	P	M
SEN_TH_051.2013	2013	C	A	T	T	C	C	A	G	T	C	C	X	C	C	C	A	T	T	A	G	A	T	T	G	0	1	P	M
SEN_TH_057.2013	2013	C	A	T	T	C	C	A	G	T	C	C	X	C	C	C	A	T	T	A	G	A	T	T	G	0	1	P	M
SEN_TH_061.2013	2013	C	A	T	T	C	C	A	G	T	C	C	X	C	C	C	A	T	T	A	G	A	T	T	G	0	1	P	M
SEN_TH_072.2013	2013	C	A	T	T	C	C	A	G	T	C	C	X	C	C	C	A	T	T	A	G	A	T	T	G	0	1	P	M
SEN_TH_073.2013	2013	C	A	T	T	C	C	A	G	T	C	C	X	C	C	C	A	T	T	A	G	A	T	T	G	0	1	P	M
SEN_TH_095.2013	2013	C	A	T	T	C	C	A	G	T	C	C	X	C	C	C	A	T	T	A	G	A	T	T	G	0	1	P	M
SEN_TH_160.2013	2013	C	A	T	T	C	C	A	G	T	C	C	X	C	C	C	A	T	T	A	G	A	T	T	G	0	1	P	M
SEN_TH_010.2013	2013	C	A	C	T	C	G	G	G	A	T	T	X	C	C	A	C	T	A	A	G	A	T	T	G	0	1	P	M
SEN_TH_006.2013	2013	C	A	C	C	C	C	G	A	A	T	C	X	C	A	C	C	T	A	A	G	A	C	T	G	0	1	P	M
SEN_TH_123.2013	2013	C	A	C	C	C	C	G	A	A	T	C	X	C	A	C	C	T	A	A	G	A	C	T	G	0	1	P	M
SEN_TH_155.2013	2013	C	A	C	C	C	C	G	A	A	T	C	X	C	A	C	C	T	A	A	G	A	C	T	G	0	1	P	M
SEN_TH_268.2013	2013	C	A	C	C	C	C	G	A	A	T	C	X	C	A	C	C	T	A	A	G	A	C	T	G	0	1	P	M
SEN_TH_295.2013	2013	C	A	X	T	C	G	A	G	T	T	T	A	C	A	A	C	T	A	A	G	A	T	T	G	0	1	P	M
SEN_TH_149.2013	2013	T	A	C	C	C	G	A	A	A	C	T	X	C	C	C	C	T	A	A	G	C	T	T	G	0	1	P	M
SEN_TH_185.2013	2013	T	A	C	C	C	G	A	A	A	C	T	X	C	C	C	C	T	A	A	G	C	T	T	G	0	1	P	M
SEN_TH_058.2013	2013	T	A	C	X	C	C	G	G	A	T	T	A	C	A	A	C	T	T	A	G	C	C	T	G	0	1	P	M
SEN_TH_212.2013	2013	T	A	C	X	C	C	G	G	A	T	T	A	C	A	A	C	T	T	A	G	C	C	T	G	0	1	P	M
SEN_TH_071.2013	2013	T	A	T	T	G	C	A	G	T	C	C	X	C	A	A	A	T	A	A	G	C	T	T	G	0	1	P	M
SEN_TH_119.2013	2013	T	A	T	T	G	C	A	G	T	C	C	X	C	A	A	A	T	A	A	G	C	T	T	G	0	1	P	M
SEN_TH_143.2013	2013	T	A	T	T	G	C	A	G	T	C	C	X	C	A	A	A	T	A	A	G	C	T	T	G	0	1	P	M
SEN_TH_293.2013	2013	T	A	C	X	G	C	G	G	T	C	C	G	T	A	C	C	T	A	A	A	A	T	T	G	0	1	P	M
SEN_TH_294.2013	2013	T	A	C	X	G	C	G	G	T	C	C	G	T	A	C	C	T	A	A	A	A	T	T	G	0	1	P	M
SEN_TH_304.2013	2013	T	A	C	X	G	C	G	G	T	C	C	G	T	A	C	C	T	A	A	A	A	T	T	G	0	1	P	M
SEN_TH_022.2013	2013	C	A	C	T	C	G	A	A	A	T	X	A	T	A	C	C	T	T	A	G	C	T	T	G	0	1	P	M
SEN_TH_023.2013	2013	C	A	C	T	C	G	A	A	A	T	X	A	T	A	C	C	T	T	A	G	C	T	T	G	0	1	P	M
SEN_TH_024.2013	2013	C	A	C	T	C	G	A	A	A	T	X	A	T	A	C	C	T	T	A	G	C	T	T	G	0	1	P	M
SEN_TH_238.2013	2013	C	A	C	T	C	G	A	A	A	T	X	A	T	A	C	C	T	T	A	G	C	T	T	G	0	1	P	M
SEN_TH_001.2013	2013	T	A	C	T	C	C	G	A	T	T	T	A	C	A	A	C	C	A	C	A	C	X	T	G	0	1	P	M
SEN_TH_002.2013	2013	T	A	C	T	C	G	A	G	A	T	T	X	C	C	C	C	T	A	C	G	A	T	T	G	0	1	P	M
SEN_TH_005.2013	2013	T	A	T	C	C	G	A	G	A	C	X	G	T	A	C	C	T	T	C	G	A	C	T	G	0	1	P	M
SEN_TH_009.2013	2013	T	A	C	T	C	C	G	G	T	C	X	A	C	A	A	A	T	A	C	G	C	T	T	G	0	1	P	M
SEN_TH_035.2013	2013	T	A	C	T	G	G	A	G	A	C	X	G	C	C	C	C	C	T	A	G	A	C	T	G	0	1	P	M
SEN_TH_040.2013	2013	T	A	C	T	C	G	A	G	A	C	T	X	C	C	C	A	C	T	A	G	C	T	T	G	0	1	P	M
SEN_TH_046.2013	2013	T	A	C	T	C	C	G	G	A	C	T	X	C	C	C	A	T	A	A	G	C	T	T	G	0	1	P	M
SEN_TH_052.2013	2013	T	A	C	T	C	C	A	G	A	C	C	A	C	A	C	C	T	T	C	X	A	T	T	G	0	1	P	M
SEN_TH_060.2013	2013	T	A	C	T	C	G	A	G	A	C	T	X	C	C	C	C	C	T	A	G	A	C	T	G	0	1	P	M
SEN_TH_069.2013	2013	T	A	C	C	C	C	G	G	A	T	T	A	C	A	A	C	T	T	A	G	C	X	T	G	0	1	P	M
SEN_TH_080.2013	2013	T	A	C	C	C	C	G	G	A	T	T	A	C	A	A	C	T	T	A	G	X	C	T	G	0	1	P	M
SEN_TH_086.2013	2013	C	A	T	T	G	G	A	G	A	C	T	G	T	A	C	A	T	T	A	G	X	C	T	G	0	1	P	M
SEN_TH_091.2013	2013	C	A	T	T	C	C	A	G	T	C	C	X	C	C	C	C	T	T	A	G	A	T	T	G	0	1	P	M
SEN_TH_100.2013	2013	C	A	C	T	C	C	A	G	A	T	T	X	C	C	A	C	T	A	A	G	C	T	T	G	0	1	P	M
SEN_TH_101.2013	2013	T	A	C	T	C	G	A	G	T	T	X	G	C	C	A	A	T	A	C	G	A	T	T	G	0	1	P	M
SEN_TH_102.2013	2013	C	A	T	C	C	G	A	G	A	C	X	G	T	A	C	C	T	T	A	G	C	C	T	G	0	1	P	M
SEN_TH_138.2013	2013	T	A	C	T	G	C	A	G	T	T	C	G	T	C	C	C	C	T	A	G	C	X	T	G	0	1	P	M
SEN_TH_142.2013	2013	C	A	T	C	C	G	A	G	A	C	T	G	T	A	C	C	C	A	A	G	C	X	T	G	0	1	P	M
SEN_TH_152.2013	2013	T	A	C	T	C	C	A	G	T	C	C	G	T	C	A	C	T	T	A	G	X	C	T	G	0	1	P	M
SEN_TH_174.2013	2013	T	A	C	T	C	C	A	G	A	T	T	A	C	C	A	C	C	A	A	G	X	C	T	G	0	1	P	M
SEN_TH_175.2013	2013	C	A	C	T	C	G	A	A	A	T	X	G	C	C	C	C	C	A	A	G	C	C	T	G	0	1	P	M
SEN_TH_184.2013	2013	C	A	C	C	C	C	G	A	A	T	C	X	C	A	C	C	T	A	A	G	C	C	T	G	0	1	P	M
SEN_TH_189.2013	2013	T	A	C	T	G	G	G	G	A	T	X	A	T	A	A	A	T	T	A	G	A	C	T	G	0	1	P	M
SEN_TH_190.2013	2013	C	A	C	T	C	G	A	G	T	T	T	G	C	A	C	C	T	T	A	G	C	X	T	G	0	1	P	M
SEN_TH_199.2013	2013	T	A	C	X	C	G	G	G	A	C	T	G	C	A	A	C	T	T	C	G	C	T	T	G	0	1	P	M
SEN_TH_205.2013	2013	C	A	C	T	C	C	A	G	T	C	T	G	C	A	A	A	T	A	A	A	X	T	T	G	0	1	P	M
SEN_TH_219.2013	2013	T	A	C	C	C	C	A	G	T	C	X	G	C	C	C	A	C	A	A	G	A	T	T	G	0	1	P	M
SEN_TH_226.2013	2013	T	A	T	T	C	C	A	G	A	C	C	G	C	A	C	A	T	T	A	G	X	C	T	G	0	1	P	M
SEN_TH_230.2013	2013	T	A	C	T	G	G	G	G	A	T	C	G	C	A	C	C	C	T	A	G	X	C	T	G	0	1	P	M
SEN_TH_239.2013	2013	C	A	C	T	G	C	G	A	A	T	T	X	C	A	A	A	C	T	A	G	C	C	T	G	0	1	P	M
SEN_TH_241.2013	2013	T	A	C	T	C	C	A	G	A	T	T	A	T	A	A	C	C	T	C	G	C	X	T	G	0	1	P	M
SEN_TH_255.2013	2013	T	A	C	X	C	C	G	A	A	C	T	G	C	A	C	A	T	T	A	G	A	T	T	G	0	1	P	M
SEN_TH_272.2013	2013	C	A	C	T	C	C	A	G	T	C	X	G	T	C	A	C	C	A	A	G	A	T	T	G	0	1	P	M
SEN_TH_281.2013	2013	C	A	C	C	G	C	G	G	A	T	X	G	T	C	A	C	T	T	A	G	A	T	T	G	0	1	P	M
SEN_TH_282.2013	2013	T	A	C	X	G	G	A	G	T	C	T	A	C	C	A	C	C	T	C	A	C	T	T	G	0	1	P	M
SEN_TH_283.2013	2013	T	A	T	T	C	C	A	G	A	C	C	G	C	A	C	X	T	T	A	G	C	C	T	G	0	1	P	M
SEN_TH_289.2013	2013	T	A	C	C	C	G	A	G	A	T	C	G	C	A	C	A	C	A	A	G	C	X	T	G	0	1	P	M
SEN_TH_306.2013	2013	C	A	C	T	C	C	A	G	A	T	T	X	C	A	C	C	T	T	A	G	A	C	T	G	0	1	P	M
SEN_TH_309.2013	2013	T	A	C	T	C	C	G	A	A	C	T	X	C	A	C	A	T	T	A	G	A	T	T	G	0	1	P	M
SEN_TH_310.2013	2013	T	A	C	X	C	G	A	G	T	T	C	A	T	A	C	C	T	T	C	G	C	T	T	G	0	1	P	M
SEN_TH_001.2014	2014	C	A	C	X	C	C	A	G	A	T	T	A	C	A	A	A	C	T	C	G	C	C	T	G	0	1	P	M
SEN_TH_002.2014	2014	C	A	C	X	C	C	A	G	A	T	T	A	C	A	A	A	C	T	C	G	C	C	T	G	0	1	P	M
SEN_TH_155.2014	2014	C	A	C	X	C	C	A	G	A	T	T	A	C	A	A	A	C	T	C	G	C	C	T	G	0	1	P	M
SEN_TH_064.2014	2014	T	A	C	X	C	C	A	G	A	T	T	A	C	A	C	C	C	T	A	G	C	C	T	G	0	1	P	M
SEN_TH_113.2014	2014	T	A	T	X	G	C	A	G	T	C	C	G	T	A	C	C	T	T	A	G	C	C	T	G	0	1	P	M
SEN_TH_195.2014	2014	C	A	C	T	G	G	A	G	A	T	C	A	X	A	C	C	C	T	A	G	C	T	T	G	0	1	P	M
SEN_TH_006.2015	2015	T	A	T	T	C	G	A	G	A	T	T	A	C	A	X	C	C	T	A	G	C	T	T	G	0	1	P	M
SEN_TH_012.2015	2015	C	A	X	T	C	G	A	G	T	T	T	A	C	A	A	C	T	A	A	G	A	T	T	G	0	1	P	M
SEN_TH_013.2015	2015	C	A	X	T	C	G	A	G	T	T	T	A	C	A	A	C	T	A	A	G	A	T	T	G	0	1	P	M
SEN_TH_020.2015	2015	C	G	X	T	C	G	A	G	T	T	T	A	C	A	A	C	T	A	A	G	A	T	T	G	0	1	P	M
SEN_TH_024.2015	2015	T	G	X	T	C	G	G	G	T	C	C	G	T	A	A	C	T	T	A	G	C	T	T	G	0	1	P	M
SEN_TH_031.2015	2015	T	G	X	C	C	G	G	G	T	C	C	G	T	A	A	C	T	T	A	G	C	T	T	G	0	1	P	M
SEN_TH_037.2015	2015	T	G	X	T	C	G	G	G	T	C	C	G	T	A	A	C	T	T	A	G	C	T	T	G	0	1	P	M
SEN_TH_047.2015	2015	T	A	T	C	G	G	A	G	A	T	X	A	T	A	C	C	C	A	A	A	C	T	T	G	0	1	P	M
SEN_TH_052.2015	2015	T	G	X	C	C	G	G	G	T	C	C	G	T	A	A	C	T	T	A	G	C	T	T	G	0	1	P	M
SEN_TH_053.2015	2015	T	G	X	C	C	G	G	G	T	C	C	G	T	A	A	C	T	T	A	G	C	T	T	G	0	1	P	M
SEN_TH_054.2015	2015	T	A	T	C	C	G	A	G	T	T	C	X	C	C	A	A	C	A	A	G	A	T	T	G	0	1	P	M
SEN_TH_073.2015	2015	C	A	T	T	C	G	G	G	A	C	X	G	C	A	C	A	T	T	A	A	A	T	T	G	0	1	P	M
SEN_TH_077.2015	2015	T	A	C	T	C	C	A	G	A	C	C	X	T	A	C	A	C	A	C	G	C	T	T	G	0	1	P	M
SEN_TH_086.2015	2015	C	A	T	C	C	C	G	G	A	C	X	G	T	C	C	C	C	T	A	G	A	T	T	G	0	1	P	M
SEN_TH_093.2015	2015	C	A	C	T	C	C	A	G	T	C	X	A	C	C	C	C	C	A	A	G	C	T	T	G	0	1	P	M
SEN_TH_094.2015	2015	T	A	C	T	G	G	A	G	T	T	T	A	T	A	C	C	T	T	A	G	A	C	X	G	0	1	P	M
SEN_TH_095.2015	2015	C	A	T	C	C	C	G	A	T	T	X	A	T	A	C	C	C	A	A	G	C	C	T	G	0	1	P	M
SEN_TH_096.2015	2015	T	A	C	T	G	G	A	G	T	T	T	A	T	A	C	C	T	T	A	G	A	C	X	G	0	1	P	M
SEN_TH_101.2015	2015	T	A	C	T	C	C	A	G	A	C	X	G	C	C	C	C	C	A	C	G	C	C	T	G	0	1	P	M
SEN_TH_102.2015	2015	T	A	C	C	C	C	G	G	T	C	X	A	C	C	C	C	C	A	A	A	A	T	T	G	0	1	P	M
SEN_TH_106.2015	2015	T	A	X	T	C	G	G	G	T	C	C	G	T	A	A	C	T	T	A	G	C	T	T	G	0	1	P	M
SEN_TH_108.2015	2015	C	A	C	T	C	G	A	G	A	C	X	G	C	C	A	C	C	T	A	G	C	T	T	G	0	1	P	M
SEN_TH_114.2015	2015	C	A	C	T	C	C	A	A	A	T	C	X	C	A	C	A	T	A	A	G	A	T	T	G	0	1	P	M
SEN_TH_116.2015	2015	T	A	C	T	C	C	A	G	A	T	X	G	C	A	A	A	C	A	C	G	A	C	T	G	0	1	P	M
SEN_TH_117.2015	2015	C	A	C	T	C	G	A	A	T	C	C	X	C	C	A	A	T	T	A	G	A	T	T	G	0	1	P	M
SEN_TH_128.2015	2015	C	A	X	T	C	G	A	G	T	T	T	A	C	A	A	C	T	A	A	G	A	T	T	G	0	1	P	M
SEN_TH_137.2015	2015	C	A	T	T	C	C	A	G	T	C	C	X	C	C	A	A	T	A	A	A	A	T	T	G	0	1	P	M
SEN_TH_141.2015	2015	T	A	C	T	G	C	A	A	A	C	X	A	T	A	C	A	C	T	A	G	C	T	T	G	0	1	P	M
SEN_TH_144.2015	2015	C	A	X	T	C	G	A	G	T	T	T	A	C	A	A	C	T	A	A	G	A	T	T	G	0	1	P	M
SEN_TH_149.2015	2015	T	A	C	T	G	C	G	G	T	C	X	A	C	A	C	C	C	A	A	G	C	C	T	G	0	1	P	M
SEN_TH_151.2015	2015	C	A	T	T	G	C	G	G	A	C	C	X	C	C	C	C	C	T	C	G	A	T	T	G	0	1	P	M
SEN_TH_158.2015	2015	T	A	C	T	C	G	A	G	T	T	T	A	C	A	C	A	C	A	A	G	A	T	X	G	0	1	P	M
SEN_TH_164.2015	2015	C	A	C	T	C	C	G	G	A	C	X	G	C	A	C	A	T	A	A	G	C	C	T	G	0	1	P	M
SEN_TH_166.2015	2015	T	A	C	T	C	G	G	A	A	C	T	X	C	C	C	A	T	A	A	G	C	T	T	G	0	1	P	M
SEN_TH_168.2015	2015	C	A	T	T	C	C	A	G	A	C	C	X	T	C	A	C	C	A	C	G	C	C	T	G	0	1	P	M
SEN_TH_171.2015	2015	C	A	T	T	C	G	A	G	T	C	X	G	C	A	C	C	C	T	C	G	A	T	T	G	0	1	P	M
SEN_TH_174.2015	2015	T	A	C	T	C	G	G	A	A	C	T	X	C	C	C	A	T	A	A	G	C	T	T	G	0	1	P	M
SEN_TH_177.2015	2015	T	A	T	T	C	C	G	G	A	T	T	A	T	A	X	C	C	T	A	A	C	T	T	G	0	1	P	M
SEN_TH_179.2015	2015	C	A	C	T	C	C	A	G	T	C	T	A	C	A	X	C	C	A	A	G	C	C	T	G	0	1	P	M
SEN_TH_181.2015	2015	C	A	C	C	C	C	G	A	A	T	C	X	C	A	C	C	T	A	A	G	A	C	T	G	0	1	P	M
SEN_TH_186.2015	2015	T	A	C	T	C	C	A	G	A	T	X	A	C	A	C	C	C	T	C	A	A	C	T	G	0	1	P	M
SEN_TH_189.2015	2015	T	G	C	T	G	C	A	G	T	T	X	A	C	A	C	C	T	T	A	G	C	T	T	G	0	1	P	M
SEN_TH_006.2016	2016	T	A	T	T	C	C	A	A	A	C	T	X	C	C	C	C	T	T	A	A	C	T	T	G	0	1	P	M
SEN_TH_010.2016	2016	T	A	C	C	C	C	A	G	A	T	X	G	T	A	C	C	C	T	C	G	C	C	T	G	0	1	P	M
SEN_TH_011.2016	2016	T	A	C	C	G	G	A	G	A	C	X	G	C	A	C	C	C	T	C	G	C	T	T	G	0	1	P	M
SEN_TH_012.2016	2016	T	A	C	C	C	C	A	G	A	T	X	G	T	A	C	C	C	T	C	G	C	C	T	G	0	1	P	M
SEN_TH_014.2016	2016	C	A	T	T	C	C	A	G	T	C	C	X	C	C	A	A	T	A	A	A	A	T	T	G	0	1	P	M
SEN_TH_020.2016	2016	C	A	T	T	C	C	A	G	T	C	C	X	C	C	A	A	T	A	A	A	A	T	T	G	0	1	P	M
SEN_TH_021.2016	2016	T	A	C	T	C	C	G	A	T	C	X	A	C	A	C	C	C	A	C	G	A	C	T	G	0	1	P	M
SEN_TH_022.2016	2016	C	A	C	T	C	C	A	G	A	T	X	G	T	A	C	C	C	A	A	A	C	T	T	G	0	1	P	M
SEN_TH_027.2016	2016	T	A	C	C	C	C	A	G	A	T	X	G	T	A	C	C	C	T	C	G	C	C	T	G	0	1	P	M
SEN_TH_028.2016	2016	T	A	C	C	C	C	A	G	A	T	X	G	T	A	C	C	C	T	C	G	C	C	T	G	0	1	P	M
SEN_TH_030.2016	2016	T	A	C	C	C	C	A	G	A	T	X	G	T	A	C	C	C	T	C	G	C	C	T	G	0	1	P	M
SEN_TH_033.2016	2016	T	A	C	C	G	C	A	G	A	T	X	A	T	A	C	A	C	A	A	G	A	T	T	G	0	1	P	M
SEN_TH_035.2016	2016	T	A	C	T	C	C	G	A	T	C	X	A	C	A	C	C	C	A	C	G	A	C	T	G	0	1	P	M
SEN_TH_036.2016	2016	T	A	T	T	C	C	A	G	T	C	C	X	C	C	A	C	T	A	A	A	C	T	T	G	0	1	P	M
SEN_TH_041.2016	2016	T	A	C	T	C	G	A	A	A	T	X	A	C	C	C	C	T	T	A	G	C	T	T	G	0	1	P	M
SEN_TH_042.2016	2016	C	A	C	T	G	G	A	G	A	T	C	A	C	A	C	C	C	X	A	G	C	T	T	G	0	1	P	M
SEN_TH_045.2016	2016	T	A	T	T	C	C	A	G	T	C	C	X	C	C	A	C	T	A	A	A	C	T	T	G	0	1	P	M
SEN_TH_046.2016	2016	T	A	C	T	G	G	G	A	A	C	T	X	C	C	C	C	T	T	A	G	C	C	T	G	0	1	P	M
SEN_TH_056.2016	2016	C	A	X	C	G	C	A	G	T	C	C	A	C	C	A	C	C	T	A	G	A	C	T	G	0	1	P	M
SEN_TH_060.2016	2016	C	A	T	T	C	G	G	A	A	T	X	A	T	A	A	A	C	T	A	G	C	T	T	G	0	1	P	M
SEN_TH_061.2016	2016	T	A	C	C	C	G	A	A	A	C	T	X	C	C	C	C	T	A	A	G	C	T	T	G	0	1	P	M
SEN_TH_063.2016	2016	T	A	C	C	C	G	A	A	A	C	T	X	C	C	C	C	T	A	A	G	C	T	T	G	0	1	P	M
SEN_TH_064.2016	2016	T	A	T	T	G	G	G	G	A	C	T	X	C	A	A	C	T	T	A	G	A	C	T	G	0	1	P	M
SEN_TH_067.2016	2016	T	A	C	T	C	C	A	G	T	C	T	A	C	A	C	A	C	X	C	G	C	T	T	G	0	1	P	M
SEN_TH_068.2016	2016	T	A	C	C	C	G	A	A	A	C	T	X	C	C	C	C	T	A	A	G	C	T	T	G	0	1	P	M
SEN_TH_073.2016	2016	T	A	C	C	C	G	A	A	A	C	T	X	C	C	C	C	T	A	A	G	C	T	T	G	0	1	P	M
SEN_TH_075.2016	2016	T	A	C	T	C	G	A	A	A	T	X	A	C	C	C	C	T	T	A	G	C	T	T	G	0	1	P	M
SEN_TH_077.2016	2016	T	A	C	C	C	G	A	A	A	C	T	X	C	C	C	C	T	A	A	G	C	T	T	G	0	1	P	M
SEN_TH_078.2016	2016	C	A	C	T	G	G	G	G	T	C	T	X	C	A	C	C	C	A	A	G	A	T	T	G	0	1	P	M
SEN_TH_080.2016	2016	T	A	X	T	C	C	A	G	T	C	T	A	C	A	A	C	T	T	C	G	A	T	T	G	0	1	P	M
SEN_TH_083.2016	2016	T	A	C	C	C	G	A	A	A	C	T	X	C	C	C	C	T	A	A	G	C	T	T	G	0	1	P	M
SEN_TH_084.2016	2016	T	A	C	C	C	G	A	A	A	C	T	X	C	C	C	C	T	A	A	G	C	T	T	G	0	1	P	M
SEN_TH_085.2016	2016	C	A	C	C	G	C	A	G	T	T	X	G	C	A	C	C	T	T	A	G	A	T	T	G	0	1	P	M
SEN_TH_086.2016	2016	C	A	T	T	C	C	A	G	T	C	C	X	C	C	A	A	T	A	A	A	A	T	T	G	0	1	P	M
SEN_TH_088.2016	2016	T	A	C	C	C	G	A	A	A	C	T	X	C	C	C	C	T	A	A	G	C	T	T	G	0	1	P	M
SEN_TH_092.2016	2016	C	A	T	T	C	C	A	G	T	C	C	X	C	C	A	A	T	A	A	A	A	T	T	G	0	1	P	M
SEN_TH_099.2016	2016	T	A	C	C	C	C	A	G	A	T	X	G	T	A	C	C	C	T	C	G	C	C	T	G	0	1	P	M
SEN_TH_102.2016	2016	T	A	C	C	C	G	A	A	A	C	T	X	C	C	C	C	T	A	A	G	C	T	T	G	0	1	P	M
SEN_TH_103.2016	2016	T	A	C	T	C	G	A	A	A	T	X	A	C	C	C	C	T	T	A	G	C	T	T	G	0	1	P	M
SEN_TH_109.2016	2016	T	A	C	C	C	G	A	A	A	C	T	X	C	C	C	C	T	A	A	G	C	T	T	G	0	1	P	M
SEN_TH_112.2016	2016	T	A	C	C	C	G	A	A	A	C	T	X	C	C	C	C	T	A	A	G	C	T	T	G	0	1	P	M
SEN_TH_114.2016	2016	T	A	C	C	C	G	A	A	A	C	T	X	C	C	C	C	T	A	A	G	C	T	T	G	0	1	P	M
SEN_TH_116.2016	2016	T	A	C	C	C	G	A	A	A	C	T	X	C	C	C	C	T	A	A	G	C	T	T	G	0	1	P	M
SEN_TH_125.2016	2016	T	A	C	T	C	C	A	G	A	C	X	G	C	C	A	C	C	A	C	G	C	T	T	G	0	1	P	M
SEN_TH_127.2016	2016	T	A	T	T	C	C	A	G	A	T	X	A	T	A	C	C	C	A	A	G	A	T	T	G	0	1	P	M
SEN_TH_133.2016	2016	T	A	X	T	G	C	A	A	A	C	T	G	C	C	C	C	C	T	A	A	C	T	T	G	0	1	P	M
SEN_TH_135.2016	2016	T	A	C	T	G	C	A	A	A	C	T	X	C	C	C	C	C	T	A	A	C	T	T	G	0	1	P	M
SEN_TH_142.2016	2016	C	A	C	T	C	C	A	G	A	T	X	G	T	A	C	C	C	T	A	G	A	T	T	G	0	1	P	M
SEN_TH_130.2015_R1	2016	C	A	T	T	G	C	G	G	A	C	C	X	C	C	C	C	C	T	C	G	A	T	T	G	0	1	P	M
SEN_TH_003.2017	2017	T	A	C	T	C	C	G	G	A	C	C	G	T	A	C	C	T	T	C	A	C	T	X	G	0	1	P	M
SEN_TH_004.2017	2017	C	A	C	T	C	C	A	G	A	T	X	G	T	A	C	C	T	T	A	G	C	T	T	G	0	1	P	M
SEN_TH_007.2017	2017	C	A	T	T	C	C	A	G	T	C	C	X	C	C	A	A	T	A	A	A	A	T	T	G	0	1	P	M
SEN_TH_013.2017	2017	C	A	T	T	C	C	A	G	T	C	C	X	C	C	A	A	T	A	A	A	A	T	T	G	0	1	P	M
SEN_TH_015.2017	2017	T	A	C	T	C	G	G	G	T	T	X	A	C	A	A	C	C	A	C	A	A	T	T	G	0	1	P	M
SEN_TH_023.2017	2017	T	A	C	T	C	G	A	G	A	C	X	A	T	C	A	C	C	T	A	G	A	C	T	G	0	1	P	M
SEN_TH_025.2017	2017	T	A	C	T	C	C	A	G	A	T	X	A	T	C	C	A	C	A	C	G	A	C	T	G	0	1	P	M
SEN_TH_031.2017	2017	T	A	C	T	C	G	G	G	T	C	X	A	T	A	C	A	T	T	A	G	C	T	T	G	0	1	P	M
SEN_TH_037.2017	2017	T	A	T	T	C	C	A	G	T	C	X	A	C	C	C	C	T	A	C	G	A	C	T	G	0	1	P	M
SEN_TH_039.2017	2017	C	A	C	T	G	C	A	A	T	C	X	A	C	A	C	C	T	T	A	A	A	C	T	G	0	1	P	M
SEN_TH_049.2017	2017	C	A	C	T	C	G	A	A	A	C	T	X	C	C	C	C	C	T	A	G	C	C	T	G	0	1	P	M
SEN_TH_069.2017	2017	T	A	T	T	C	C	G	G	A	C	X	G	C	A	C	C	T	T	A	G	A	C	T	G	0	1	P	M
SEN_TH_072.2017	2017	C	A	T	T	G	C	A	G	T	C	C	X	C	A	A	C	C	T	C	G	A	T	T	G	0	1	P	M
SEN_TH_074.2017	2017	T	A	C	T	C	C	A	G	T	C	X	A	C	C	C	C	C	A	C	G	A	C	T	G	0	1	P	M
SEN_TH_082.2017	2017	T	A	C	C	C	G	G	G	T	C	X	G	C	A	A	C	T	A	A	G	A	T	T	G	0	1	P	M
SEN_TH_083.2017	2017	T	A	C	T	G	G	A	G	A	T	C	G	C	A	A	A	C	T	C	G	X	C	T	G	0	1	P	M
SEN_TH_084.2017	2017	T	A	C	T	C	C	A	G	T	C	X	A	C	A	C	C	T	A	A	G	A	C	T	G	0	1	P	M
SEN_TH_087.2017	2017	C	A	C	T	C	C	A	G	A	T	X	G	T	A	C	C	T	T	A	G	C	T	T	G	0	1	P	M
SEN_TH_088.2017	2017	C	A	C	T	C	C	A	G	A	T	X	G	T	A	C	C	T	T	A	G	C	T	T	G	0	1	P	M
SEN_TH_100.2017	2017	C	A	T	T	C	C	G	G	A	T	X	A	C	A	C	C	T	T	A	G	C	C	T	G	0	1	P	M
SEN_TH_113.2017	2017	C	A	T	T	C	G	G	G	A	C	T	X	C	C	C	C	T	T	C	G	C	T	T	G	0	1	P	M
SEN_TH_114.2017	2017	T	A	C	T	C	X	G	G	T	T	C	G	C	A	A	C	C	A	C	G	A	T	T	G	0	1	P	M
SEN_TH_116.2017	2017	T	A	X	T	C	C	A	G	T	T	T	A	T	A	C	A	C	A	A	G	A	T	T	G	0	1	P	M
SEN_TH_123.2017	2017	T	A	T	T	C	G	G	G	T	C	X	A	C	C	C	C	T	A	A	A	A	T	T	G	0	1	P	M
SEN_TH_213.2007	2007	T	A	C	T	C	G	N	G	A	C	X	G	T	A	C	C	C	A	A	G	A	T	T	G	1	1	P	M
SEN_TH_224.2007	2007	C	A	C	T	C	G	N	G	A	C	T	X	C	A	C	A	T	A	A	A	C	T	T	G	1	1	P	M
SEN_TH_111.2010	2010	T	A	C	T	C	G	A	N	A	T	X	A	T	A	C	A	T	A	C	A	C	T	T	G	1	1	P	M
SEN_TH_016.2012	2012	C	A	C	T	C	C	N	G	T	C	C	X	C	C	A	C	C	T	A	G	A	C	T	G	1	1	P	M
SEN_TH_028.2012	2012	T	A	T	T	C	C	A	G	A	T	X	G	C	A	A	C	T	T	N	G	A	C	T	G	1	1	P	M
SEN_TH_046.2012	2012	C	A	T	T	C	C	A	G	T	C	C	X	C	C	A	A	T	A	A	G	A	N	T	G	1	1	P	M
SEN_TH_059.2012	2012	C	A	T	T	C	C	A	G	T	C	C	X	C	C	C	A	T	T	A	G	A	N	T	G	1	1	P	M
SEN_TH_113.2012	2012	T	A	C	T	C	G	A	G	A	C	N	X	C	C	C	A	C	T	A	G	C	T	T	G	1	1	P	M
SEN_TH_165.2012	2012	T	A	C	C	C	G	A	G	N	C	T	X	C	A	C	A	T	A	C	G	C	T	T	G	1	1	P	M
SEN_TH_213.2012	2012	T	A	C	T	C	C	A	G	T	T	X	G	C	C	A	A	T	A	N	G	A	T	T	G	1	1	P	M
SEN_TH_220.2012	2012	T	A	T	T	C	C	A	N	A	C	X	G	T	A	C	C	C	A	A	G	C	T	T	G	1	1	P	M
SEN_TH_234.2012	2012	T	A	C	T	C	C	A	N	A	C	T	X	C	C	C	C	T	T	A	G	C	T	T	G	1	1	P	M
SEN_TH_239.2012	2012	C	A	C	T	C	C	N	G	A	T	T	X	C	C	A	C	T	T	A	G	A	T	T	G	1	1	P	M
SEN_TH_244.2012	2012	T	G	C	T	C	C	A	N	A	C	T	X	C	C	A	A	C	A	A	G	C	T	T	G	1	1	P	M
SEN_TH_031.2013	2013	T	A	C	T	C	C	G	G	T	C	C	A	C	C	N	C	C	A	A	A	A	X	T	G	1	1	P	M
SEN_TH_066.2013	2013	T	A	T	T	G	C	A	G	T	C	C	X	N	A	A	A	T	A	A	G	C	T	T	G	1	1	P	M
SEN_TH_089.2013	2013	T	A	T	T	G	C	N	G	T	C	C	X	C	A	A	A	T	A	A	G	C	T	T	G	1	1	P	M
SEN_TH_130.2013	2013	T	A	C	T	C	G	A	A	A	T	X	A	T	A	C	A	T	A	C	A	N	T	T	G	1	1	P	M
SEN_TH_150.2013	2013	C	A	C	T	C	G	N	G	A	T	T	X	C	C	A	C	T	A	A	G	A	T	T	G	1	1	P	M
SEN_TH_162.2013	2013	C	A	C	T	C	G	A	G	A	C	X	G	T	A	N	A	T	A	A	A	A	T	T	G	1	1	P	M
SEN_TH_167.2013	2013	T	A	C	T	C	C	G	G	A	T	T	G	T	A	C	C	T	A	A	A	N	X	T	G	1	1	P	M
SEN_TH_176.2013	2013	T	G	T	T	C	C	A	G	A	C	T	A	T	C	N	A	T	A	A	G	X	C	T	G	1	1	P	M
SEN_TH_265.2013	2013	T	A	C	T	G	G	G	G	A	T	X	G	C	A	C	C	N	T	A	G	A	C	T	G	1	1	P	M
SEN_TH_069.2016	2016	C	A	C	T	C	C	A	G	A	T	C	X	C	A	A	A	C	N	C	G	A	T	T	G	1	1	P	M
SEN_TH_016.2017	2017	T	G	T	T	C	G	A	G	T	C	N	X	C	C	C	A	C	A	A	G	C	T	T	G	1	1	P	M
SEN_TH_116.2006	2006	T	A	C	T	G	C	G	G	T	C	X	A	C	C	C	C	C	X	A	G	C	T	T	G	0	2	P	M
SEN_TH_158.2007	2007	T	A	C	T	C	C	A	G	A	C	X	X	T	A	C	C	T	A	C	G	C	T	T	G	0	2	P	M
SEN_TH_041.2011	2011	C	A	C	T	C	C	G	G	A	T	X	X	C	C	A	C	T	A	A	G	A	T	T	G	0	2	P	M
SEN_TH_159.2012	2012	T	A	C	T	C	G	A	G	T	C	T	A	C	A	C	A	C	X	A	G	X	T	T	G	0	2	P	M
SEN_TH_205.2012	2012	T	A	C	T	C	C	A	G	A	X	T	A	C	A	A	C	C	X	A	G	C	C	T	G	0	2	P	M
SEN_TH_207.2012	2012	T	A	C	T	C	C	G	G	A	T	X	X	C	A	C	A	C	A	C	G	A	C	T	G	0	2	P	M
SEN_TH_059.2013	2013	C	A	C	C	C	C	G	A	A	T	C	X	C	A	C	C	T	A	A	G	X	C	T	G	0	2	P	M
SEN_TH_042.2013	2013	C	A	X	T	C	G	A	G	T	T	T	A	C	A	A	C	T	A	A	G	X	T	T	G	0	2	P	M
SEN_TH_047.2013	2013	C	A	C	T	C	G	A	G	T	T	T	X	C	C	A	C	T	A	A	X	C	C	T	G	0	2	P	M
SEN_TH_082.2013	2013	T	A	T	T	C	C	A	G	T	C	C	X	C	A	A	A	T	A	A	G	X	T	T	G	0	2	P	M
SEN_TH_128.2013	2013	C	A	C	C	C	C	A	A	T	C	X	X	C	C	C	A	T	A	A	G	A	C	T	G	0	2	P	M
SEN_TH_188.2013	2013	C	A	C	C	C	C	G	G	T	C	C	A	C	C	A	A	T	T	A	G	X	X	T	G	0	2	P	M
SEN_TH_198.2013	2013	T	A	C	X	C	G	A	G	T	T	T	A	T	A	C	C	T	T	C	G	X	T	T	G	0	2	P	M
SEN_TH_207.2013	2013	T	A	C	T	C	G	G	G	A	C	T	X	C	C	C	A	T	A	A	G	X	T	T	G	0	2	P	M
SEN_TH_242.2013	2013	T	A	C	T	C	C	G	G	T	C	C	A	C	C	A	X	T	A	A	A	A	X	T	G	0	2	P	M
SEN_TH_307.2013	2013	T	A	C	T	C	C	G	G	T	T	C	X	T	C	C	X	C	T	A	G	A	T	T	G	0	2	P	M
SEN_TH_018.2015	2015	T	G	C	T	C	C	A	G	A	C	X	X	T	A	C	C	C	T	C	G	A	T	T	G	0	2	P	M
SEN_TH_026.2015	2015	T	G	X	X	C	G	G	G	T	C	C	G	T	A	A	C	T	T	A	G	C	T	T	G	0	2	P	M
SEN_TH_032.2015	2015	T	G	C	C	G	G	G	A	A	C	X	A	C	C	C	A	T	A	A	A	X	C	T	G	0	2	P	M
SEN_TH_033.2015	2015	T	G	C	C	G	G	G	A	A	C	X	A	C	C	C	A	T	A	A	A	X	C	T	G	0	2	P	M
SEN_TH_103.2015	2015	T	A	C	T	G	C	A	A	A	T	X	A	T	A	X	A	C	A	C	G	A	T	T	G	0	2	P	M
SEN_TH_110.2015	2015	C	A	C	T	C	C	G	G	T	C	X	X	C	A	A	C	T	T	C	G	A	T	T	G	0	2	P	M
SEN_TH_131.2015	2015	C	A	T	T	C	C	A	G	T	C	C	X	C	C	X	A	T	A	A	A	A	T	T	G	0	2	P	M
SEN_TH_111.2016	2016	C	A	T	T	C	C	A	G	T	C	C	X	C	C	X	A	T	A	A	A	A	T	T	G	0	2	P	M
SEN_TH_141.2016	2016	T	A	C	C	C	G	A	A	A	C	X	X	C	C	C	C	T	A	A	G	C	T	T	G	0	2	P	M
SEN_TH_192.2013	2013	T	A	T	T	C	C	N	G	T	C	C	A	C	C	C	A	T	X	A	G	X	C	T	G	1	2	P	M
SEN_TH_209.2013	2013	T	A	C	T	C	C	N	A	A	C	T	G	C	A	C	A	T	T	A	G	X	X	T	G	1	2	P	M
SEN_TH_064.2015	2015	X	A	T	T	C	C	A	G	A	T	X	G	C	N	C	C	T	T	A	G	A	C	T	G	1	2	P	M
SEN_TH_039.2013	2013	C	A	T	T	C	C	A	G	T	X	C	X	C	C	C	C	T	T	A	G	A	T	X	G	0	3	P	M
SEN_TH_085.2013	2013	T	A	C	T	C	X	A	G	A	T	T	A	T	A	A	C	C	T	C	G	X	X	T	G	0	3	P	M
SEN_TH_087.2013	2013	C	X	C	T	C	C	G	A	A	T	C	X	C	A	C	C	T	A	A	G	X	C	T	G	0	3	P	M
SEN_TH_170.2013	2013	C	A	T	X	C	G	A	G	A	C	X	G	T	A	C	C	C	X	A	G	C	T	T	G	0	3	P	M
SEN_TH_252.2013	2013	T	A	C	X	C	C	G	A	A	C	T	G	C	A	C	A	T	T	A	G	X	X	T	G	0	3	P	M
SEN_TH_260.2013	2013	T	A	C	T	C	G	A	G	T	C	X	G	T	C	A	C	T	A	A	G	A	X	X	G	0	3	P	M
SEN_TH_082.2016	2016	C	A	T	T	C	C	A	G	T	C	X	X	C	C	X	A	T	A	A	A	A	T	T	G	0	3	P	M
SEN_TH_259.2013	2013	T	A	C	X	C	C	N	G	A	T	X	G	C	A	C	A	C	T	A	G	X	T	T	G	1	3	P	M
SEN_TH_250.2013	2013	C	A	T	X	C	C	A	G	T	C	C	X	C	C	A	A	T	A	A	G	X	X	T	G	0	4	P	M
SEN_TH_251.2013	2013	C	A	T	X	C	C	A	G	T	C	C	X	C	C	C	A	T	T	A	G	X	X	T	G	0	4	P	M
SEN_TH_254.2013	2013	T	A	C	X	C	C	G	G	T	T	X	G	T	C	C	C	T	A	A	G	X	X	T	G	0	4	P	M
SEN_TH_099.2015	2015	T	A	C	T	C	C	A	G	N	C	C	N	T	A	C	A	C	A	C	G	C	T	T	G	2	0	P	P
SEN_TH_117.2016	2016	T	A	C	T	C	N	A	G	A	T	C	G	T	C	C	C	N	T	A	G	C	T	T	G	2	0	P	P
SEN_TH_122.2016	2016	T	A	T	C	C	G	N	G	A	T	C	G	T	C	C	N	C	T	A	G	C	C	T	G	2	0	P	P
SEN_TH_047.2017	2017	T	A	T	T	G	C	G	G	T	T	N	G	N	A	C	C	T	A	A	G	C	T	T	G	2	0	P	P
SEN_TH_081.2017	2017	T	A	C	T	C	C	A	G	T	C	T	A	C	C	C	C	C	A	N	G	A	N	T	G	2	0	P	P
SEN_TH_105.2017	2017	T	A	C	T	C	C	G	G	N	T	T	G	T	A	C	C	C	A	A	G	N	C	T	G	2	0	P	P
SEN_TH_083.2015	2015	T	A	C	N	C	N	A	G	T	T	C	G	C	C	C	A	N	T	A	G	C	T	T	G	3	0	P	P
SEN_TH_097.2015	2015	T	A	C	T	C	C	A	G	N	C	C	N	N	A	C	A	C	A	C	G	C	T	T	G	3	0	P	P
SEN_TH_050.2016	2016	T	A	C	T	C	C	A	G	A	T	C	N	C	A	A	C	N	A	C	N	C	C	T	G	3	0	P	P
SEN_TH_002.2017	2017	T	A	C	T	C	C	N	G	T	N	C	A	C	C	C	C	T	A	A	G	N	C	T	G	3	0	P	P
SEN_TH_086.2017	2017	C	A	N	T	C	G	G	G	A	C	T	A	C	N	C	C	T	T	A	G	N	C	T	G	3	0	P	P
SEN_TH_089.2017	2017	T	N	C	C	N	N	A	G	A	T	T	G	C	C	C	C	T	A	A	G	C	T	T	G	3	0	P	P
SEN_TH_098.2017	2017	C	A	N	T	C	C	G	G	N	T	C	G	T	N	C	C	C	A	A	G	A	C	T	G	3	0	P	P
SEN_TH_038.2015	2015	T	G	C	C	G	N	G	G	A	T	N	A	T	A	C	N	C	T	A	G	A	N	T	G	4	0	P	P
SEN_TH_160.2015	2015	C	A	C	T	C	N	A	G	N	T	T	A	C	A	A	C	N	A	A	G	A	N	T	G	4	0	P	P
SEN_TH_019.2016	2016	N	A	C	T	C	N	G	G	A	C	C	G	T	N	C	C	T	T	C	G	A	N	T	G	4	0	P	P
SEN_TH_051.2016	2016	T	A	C	T	C	N	G	G	A	C	C	N	T	A	A	C	N	T	C	G	A	N	T	G	4	0	P	P
SEN_TH_076.2016	2016	T	A	C	T	C	N	N	G	A	C	T	G	C	A	N	C	N	A	C	G	A	C	T	G	4	0	P	P
SEN_TH_113.2016	2016	T	A	N	T	C	G	N	G	A	T	T	G	N	C	C	A	T	T	A	N	A	C	T	G	4	0	P	P
SEN_TH_022.2017	2017	N	A	C	T	C	C	G	G	A	N	T	N	C	A	C	C	N	A	A	G	A	T	T	G	4	0	P	P
SEN_TH_097.2017	2017	C	A	N	N	C	C	G	G	N	T	C	G	T	C	N	C	C	A	A	G	A	C	T	G	4	0	P	P
SEN_TH_101.2017	2017	C	A	N	N	C	C	G	G	N	T	C	G	T	C	N	C	C	A	A	G	A	C	T	G	4	0	P	P
SEN_TH_045.2015	2015	C	G	T	C	C	N	A	G	A	T	C	N	N	A	C	N	C	A	N	G	A	C	T	G	5	0	P	P
SEN_TH_046.2015	2015	C	G	T	C	C	N	A	G	A	T	C	N	N	A	C	N	C	A	N	G	A	C	T	G	5	0	P	P
SEN_TH_145.2015	2015	C	A	T	T	N	C	A	G	N	N	C	G	C	N	C	C	C	T	N	G	A	T	T	G	5	0	P	P
SEN_TH_018.2016	2016	T	A	C	T	N	N	G	G	A	C	C	G	T	A	N	C	N	T	C	G	A	N	T	G	5	0	P	P
SEN_TH_038.2016	2016	N	A	T	T	N	C	N	G	A	C	C	A	C	A	C	C	N	T	A	G	N	T	T	G	5	0	P	P
SEN_TH_101.2016	2016	C	A	T	T	C	N	N	G	T	C	C	N	C	A	C	C	N	T	A	G	A	N	T	G	5	0	P	P
SEN_TH_033.2017	2017	C	A	N	T	N	C	G	G	A	N	T	N	C	A	C	C	N	A	A	G	A	T	T	G	5	0	P	P
SEN_TH_067.2017	2017	T	A	C	T	G	N	G	N	N	C	C	A	C	A	N	C	C	A	A	G	C	N	T	G	5	0	P	P
SEN_TH_102.2017	2017	C	A	N	N	C	C	G	G	N	T	C	G	T	N	N	C	C	A	A	G	A	C	T	G	5	0	P	P
SEN_TH_005.2015	2015	T	A	C	T	C	C	N	G	A	N	C	G	T	A	C	N	T	N	A	G	N	N	T	G	6	0	P	P
SEN_TH_039.2015	2015	C	N	C	C	C	C	N	G	N	T	N	A	N	C	C	C	C	N	A	G	A	T	T	G	6	0	P	P
SEN_TH_142.2015	2015	C	A	T	T	N	C	N	G	N	N	C	G	C	N	C	C	C	T	N	G	A	T	T	G	6	0	P	P
SEN_TH_146.2015	2015	C	A	T	T	N	C	N	G	N	N	C	G	C	N	C	C	C	T	N	G	A	T	T	G	6	0	P	P
SEN_TH_150.2015	2015	C	A	T	T	N	C	N	G	N	N	C	G	C	N	C	C	C	T	N	G	A	T	T	G	6	0	P	P
SEN_TH_009.2016	2016	T	A	C	T	N	N	A	G	T	C	C	N	N	A	C	N	T	T	A	G	A	N	T	G	6	0	P	P
SEN_TH_009.2017	2017	T	A	C	T	C	C	N	G	N	N	C	N	C	N	C	C	T	A	A	G	N	C	T	G	6	0	P	P
SEN_TH_024.2017	2017	T	A	N	T	C	C	A	G	T	C	N	G	N	N	C	N	C	T	A	G	N	T	T	G	6	0	P	P
SEN_TH_014.2015	2015	T	N	N	N	C	N	A	G	A	C	T	N	C	A	C	C	N	N	A	G	C	C	T	G	7	0	P	P
SEN_TH_027.2015	2015	T	G	C	T	N	N	A	G	A	N	N	G	C	A	C	N	T	N	N	A	C	T	T	G	7	0	P	P
SEN_TH_057.2015	2015	C	G	C	C	N	G	N	N	T	N	T	A	N	A	N	C	N	A	A	G	C	C	T	G	7	0	P	P
SEN_TH_079.2015	2015	T	A	C	N	C	C	N	G	N	N	N	N	N	A	C	C	T	T	A	G	C	T	T	G	7	0	P	P
SEN_TH_148.2015	2015	N	A	C	T	C	N	N	G	N	C	C	N	N	A	A	C	C	A	A	A	N	C	T	G	7	0	P	P
SEN_TH_007.2016	2016	N	A	C	T	C	G	A	G	A	N	C	N	N	A	N	C	N	A	A	G	A	N	T	G	7	0	P	P
SEN_TH_019.2017	2017	T	A	T	T	C	G	G	G	N	N	N	A	N	A	N	C	N	N	A	A	A	T	T	G	7	0	P	P
SEN_TH_036.2015	2015	T	A	C	C	C	N	N	G	N	N	T	N	T	A	A	C	C	N	N	G	N	N	T	G	9	0	P	P
SEN_TH_025.2016	2016	T	A	N	N	C	C	A	N	T	N	N	G	N	N	C	C	T	N	A	A	C	N	T	G	9	0	P	P
SEN_TH_049.2016	2016	T	A	N	N	C	G	N	G	N	C	T	N	N	A	C	C	N	A	N	G	C	N	T	G	9	0	P	P
SEN_TH_050.2017	2017	C	A	C	T	C	N	N	N	N	N	C	N	C	C	C	C	C	N	A	N	C	N	T	G	9	0	P	P
SEN_TH_058.2017	2017	C	N	C	T	C	N	N	G	A	T	N	N	C	N	C	A	C	A	A	N	N	N	T	G	9	0	P	P
SEN_TH_011.2015	2015	T	A	C	N	N	C	A	G	N	N	T	A	C	A	C	N	N	A	N	N	N	N	T	G	10	0	P	P
SEN_TH_123.2016	2016	N	N	N	T	C	N	G	G	A	N	N	G	N	N	C	N	T	T	A	N	C	T	T	G	10	0	P	P
SEN_TH_126.2016	2016	T	A	N	T	C	N	N	A	N	T	C	N	T	C	C	C	N	N	N	N	C	N	T	G	10	0	P	P
SEN_TH_059.2017	2017	T	A	C	T	N	N	N	G	N	N	N	G	C	N	C	C	N	N	A	G	C	N	T	G	10	0	P	P
SEN_TH_108.2017	2017	T	A	N	N	C	C	N	G	N	T	N	N	N	A	A	C	C	N	N	G	C	N	T	G	10	0	P	P
SEN_TH_071.2016	2016	N	A	C	T	C	N	N	G	A	T	T	N	N	N	N	N	C	N	A	N	C	N	T	G	11	0	P	P
SEN_TH_017.2017	2017	N	A	N	T	C	C	A	N	N	N	N	N	N	N	C	C	N	A	A	G	A	N	T	G	11	0	P	P
SEN_TH_023.2015	2015	N	G	C	T	C	N	N	G	N	N	N	A	N	A	N	N	N	A	N	G	N	T	T	G	12	0	P	P
SEN_TH_182.2015	2015	N	N	C	T	N	N	N	N	T	N	T	G	C	C	N	N	N	N	N	G	C	C	T	G	12	0	P	P
SEN_TH_070.2016	2016	N	N	N	N	C	C	A	N	T	N	N	G	T	A	N	C	N	N	A	N	A	N	T	G	12	0	P	P
SEN_TH_185.2015	2015	T	A	N	T	C	N	N	G	N	N	N	N	C	N	C	N	N	A	A	N	N	N	T	G	13	0	P	P
SEN_TH_081.2016	2016	N	A	C	T	C	N	N	G	A	N	N	N	C	N	N	N	N	N	A	G	N	N	T	G	13	0	P	P
SEN_TH_087.2016	2016	N	A	N	T	C	G	N	N	N	N	N	N	C	N	C	C	N	N	N	N	N	N	T	G	15	0	P	P
SEN_TH_038.2017	2017	T	A	C	T	C	C	G	G	A	T	X	G	C	A	C	N	C	N	A	G	C	C	T	G	2	1	P	P
SEN_TH_152.2015	2015	T	A	C	T	C	C	N	G	T	C	T	X	N	A	C	C	C	A	N	G	C	C	T	G	3	1	P	P
SEN_TH_096.2016	2016	T	A	C	T	C	C	N	G	A	T	X	A	T	A	C	C	C	N	A	N	C	T	T	G	3	1	P	P
SEN_TH_002.2016	2016	X	A	C	T	N	C	A	G	N	T	N	G	C	A	N	C	C	A	N	G	A	T	T	G	5	1	P	P
SEN_TH_050.2015	2015	C	N	N	N	C	G	A	N	A	T	X	A	C	N	A	N	N	A	A	N	N	N	T	G	10	1	P	P
SEN_TH_155.2015	2015	T	A	T	T	N	N	A	G	A	N	X	X	N	N	C	C	N	A	N	N	N	N	T	G	10	2	P	P
SEN_TH_229.2008	2008	T	X	X	X	C	X	A	G	A	C	X	G	C	A	A	C	T	T	A	G	A	T	T	G	0	5	F
SEN_TH_093.2009	2009	X	A	C	T	C	C	G	G	T	T	C	G	X	A	C	X	C	X	C	G	A	C	T	X	0	5	F
SEN_TH_127.2009	2009	X	A	T	T	C	G	A	G	A	C	C	A	X	C	C	X	C	X	A	G	A	C	T	X	0	5	F
SEN_TH_078.2015	2015	X	X	C	C	C	G	A	G	A	T	C	X	C	A	C	X	C	A	A	G	X	T	T	G	0	5	F
SEN_TH_036.2017	2017	X	X	X	X	X	X	X	G	A	X	X	X	X	X	X	X	X	X	X	X	X	X	X	X	0	22	F
SEN_TH_004.2015	2015	X	X	X	X	G	X	X	X	X	X	X	X	X	X	X	X	X	X	X	X	X	X	X	X	0	23	F
SEN_TH_036.2017	2017	X	X	X	X	X	X	X	X	X	X	X	X	X	X	X	X	X	X	X	X	X	X	X	G	0	23	F
