# Supplementary material for: Genetic evidence for imported malaria and local transmission in Richard Toll, Senegal
Source: Malar J. 2020 Aug 3;19:276. doi: 10.1186/s12936-020-03346-x (PMC7397603; doi:10.1186/s12936-020-03346-x)
Supplement: Supplementary file 6 — Additional file 6. Persistent parasite lineages. [file 12936_2020_3346_MOESM6_ESM.xlsx]

## Sheet: Sheet1
24 Match (Ignore X and N)
SEN_RT_145.2013	T	A	C	T	C	G	A	G	A	T	C	G	C	A	C	A	C	A	C	G	C	T	T	G
SEN_RT_485.2013	T	A	C	T	C	G	A	G	A	T	C	G	C	A	C	A	C	A	C	G	C	T	T	G
SEN_RT_524.2013	T	A	C	T	C	G	A	G	A	T	C	G	C	A	C	A	C	A	C	G	C	T	T	G
SEN_RT_254.2015	T	A	C	T	C	G	A	G	A	T	C	G	C	A	C	A	C	A	C	G	C	T	T	G
SEN_RT_078.2013	T	A	T	T	G	C	A	G	A	T	T	G	C	A	C	A	T	A	A	G	C	T	T	G
SEN_RT_412.2013	T	A	T	T	G	C	A	G	A	T	T	G	C	A	C	A	T	A	A	G	C	T	T	G
SEN_RT_580.2014	T	A	T	T	G	C	A	G	A	T	T	G	C	A	C	A	T	A	A	G	C	T	T	G
SEN_RT_591.2014	T	A	T	T	G	C	A	G	A	T	T	G	C	A	C	A	T	A	A	G	C	T	T	G
SEN_RT_163.2015	T	A	T	T	G	C	A	G	A	T	T	G	C	A	C	A	T	A	A	G	C	T	T	G
SEN_RT_164.2015	T	A	T	T	G	C	A	G	A	T	T	G	C	A	C	A	T	A	A	G	C	T	T	G
SEN_RT_289.2015	T	A	T	T	G	C	A	G	A	T	T	G	C	A	C	A	T	A	A	G	C	T	T	G
SEN_RT_334.2015	T	A	T	T	G	C	A	G	A	T	T	G	C	A	C	A	T	A	A	G	C	T	T	G
SEN_RT_043.2015	T	A	T	T	G	C	A	G	A	T	T	G	C	A	C	A	T	A	A	G	C	T	T	G
SEN_RT_707.2015	T	A	T	T	G	C	A	G	A	T	T	G	C	A	C	A	T	A	A	G	C	T	T	G
SEN_RT_242.2015	T	A	T	T	G	C	A	G	A	T	T	G	C	A	C	A	T	A	A	G	C	T	T	G
SEN_RT_241.2015	T	A	T	T	G	C	A	G	A	T	T	G	C	A	C	A	T	A	A	G	C	T	T	G
SEN_RT_245.2015	T	A	T	T	G	C	A	G	A	T	T	G	C	A	C	A	T	A	A	G	C	T	T	G
SEN_RT_157.2013	C	A	C	T	C	C	A	G	T	C	T	A	C	A	C	A	C	T	A	G	C	C	T	G
SEN_RT_520.2013	C	A	C	T	C	C	A	G	T	C	T	A	C	A	C	A	C	T	A	G	C	C	T	G
SEN_RT_533.2013	C	A	C	T	C	C	A	G	T	C	T	A	C	A	C	A	C	T	A	G	C	C	T	G
SEN_RT_207.2014	C	A	C	T	C	C	A	G	T	C	T	A	C	A	C	A	C	T	A	G	C	C	T	G
SEN_RT_617.2014	C	A	C	T	C	C	A	G	T	C	T	A	C	A	C	A	C	T	A	G	C	C	T	G
SEN_RT_185.2013	C	A	T	T	C	G	A	G	A	T	C	G	C	A	C	A	C	T	A	G	C	T	T	G
SEN_RT_201.2013	C	A	T	T	C	G	A	G	A	T	C	G	C	A	C	A	C	T	A	G	C	T	T	G
SEN_RT_539.2013	C	A	T	T	C	G	A	G	A	T	C	G	C	A	C	A	C	T	A	G	C	T	T	G
SEN_RT_202.2014	C	A	T	T	C	G	A	G	A	T	C	G	C	A	C	A	C	T	A	G	C	T	T	G
SEN_RT_759.2015	C	A	T	T	C	G	A	G	A	T	C	G	C	A	C	A	C	T	A	G	C	T	T	G
SEN_RT_404.2012	C	A	C	T	C	C	A	G	A	C	T	G	C	A	C	A	C	A	C	G	C	T	T	G
SEN_RT_424.2013	C	A	C	T	C	C	A	G	A	C	T	G	C	A	C	A	C	A	C	G	C	T	T	G
SEN_RT_434.2013	C	A	C	T	C	C	A	G	A	C	T	G	C	A	C	A	C	A	C	G	C	T	T	G
SEN_RT_056.2013	C	A	C	T	C	C	A	G	A	C	T	G	C	A	C	A	C	A	C	G	C	T	T	G
SEN_RT_665.2015	C	A	C	T	C	C	A	G	A	C	T	G	C	A	C	A	C	A	C	G	C	T	T	G
SEN_RT_664.2015	C	A	C	T	C	C	A	G	A	C	T	G	C	A	C	N	C	A	C	G	C	T	T	G
SEN_RT_087.2012	T	A	C	T	C	C	A	G	T	C	X	A	C	C	A	C	T	A	C	G	A	T	T	G
SEN_RT_741.2015	T	A	C	T	C	C	A	G	T	C	X	A	C	C	A	C	T	A	C	G	A	T	T	G
SEN_RT_147.2013	C	A	T	T	C	G	A	G	T	T	T	A	C	A	A	C	T	A	A	G	A	T	T	G
SEN_RT_271.2015	C	A	X	T	C	G	A	G	T	T	T	A	C	A	A	C	T	A	A	G	A	T	T	G
23 Match
SEN_RT_100.2012	T	A	C	T	C	G	A	G	T	T	T	A	T	A	C	C	C	T	C	G	C	T	T	G
SEN_RT_393.2012	T	A	C	T	C	G	A	G	T	T	T	A	T	A	C	C	C	T	C	G	C	T	T	G
SEN_RT_528.2013	T	A	C	T	C	G	A	G	T	T	T	A	T	A	A	C	C	T	C	G	C	T	T	G
SEN_RT_203.2014	T	A	C	T	C	C	A	G	A	C	C	G	T	A	C	C	T	T	A	G	A	T	T	G
SEN_RT_204.2014	T	A	C	T	C	C	A	G	A	C	C	G	T	A	C	C	T	X	A	G	A	T	T	G
SEN_RT_679.2015	T	A	C	T	C	C	A	G	A	C	C	G	T	A	C	C	T	A	A	G	A	T	T	G
SEN_RT_119.2012	C	A	T	T	C	G	A	G	T	T	C	G	T	A	C	C	C	A	A	G	C	C	T	G
SEN_RT_132.2013	C	A	T	T	C	G	A	G	T	T	C	G	T	A	C	C	C	A	C	G	C	C	T	G
SEN_RT_566.2014	C	A	T	T	C	G	A	G	T	T	C	G	T	A	C	C	C	A	C	G	C	C	T	G
