# Supplementary material for: Genetic evidence for imported malaria and local transmission in Richard Toll, Senegal
Source: Malar J. 2020 Aug 3;19:276. doi: 10.1186/s12936-020-03346-x (PMC7397603; doi:10.1186/s12936-020-03346-x)
Supplement: Supplementary file 7 — Additional file 7. Household comparisons. [file 12936_2020_3346_MOESM7_ESM.xlsx]

## Sheet: Sheet1
NAME																									Mixed	Missing	Travel	Type	Score				Data By Year	2012		2013		2014		2015		TOTAL
SEN_RT_002.2014	T	A	C	T	C	C	A	G	A	T	C	G	C	C	C	C	C	A	A	G	C	T	X	G	0	1	no	Index	Highly Related					Index: Traveler	Index: Non-Traveler	Index: Traveler	Index: Non-Traveler	Index: Traveler	Index: Non-Traveler	Index: Traveler	Index: Non-Traveler	Index: Traveler	Index: Non-Traveler
SEN_RT_176.2014	T	A	C	T	C	C	A	G	A	T	C	G	C	C	C	C	C	A	A	G	C	T	X	G	0	1	no	Secondary	Highly Related				Household Match	0	0	0	0	0	3	1	3	1	6	7
SEN_RT_177.2014	T	A	C	T	C	C	A	G	A	N	C	G	C	C	C	C	C	A	A	G	C	T	X	G	1	1	no	Secondary	Highly Related				Household No Match	1	0	3	1	1	0	2	0	7	1	8
SEN_RT_174.2014	T	A	C	T	C	C	A	G	N	T	C	G	C	C	C	C	C	A	A	G	C	T	X	G	1	1	no	Secondary	Highly Related													8	7
																																										Fisher Exact Test: p = 0.010
SEN_RT_024.2014	C	A	C	T	C	C	G	G	A	T	C	A	C	A	X	A	C	A	C	G	A	T	T	G	0	1	no	Index	Highly Related
SEN_RT_144.2014	C	A	C	T	C	C	G	G	A	T	C	A	C	A	A	A	C	A	C	G	A	T	T	G	0	0	no	Secondary	Highly Related
SEN_RT_038.2015	T	A	C	T	C	C	A	G	T	C	T	A	C	C	C	C	C	T	A	G	C	C	T	G	0	0	yes	Index	Highly Related
SEN_RT_172.2015	T	A	C	T	C	C	A	G	T	C	T	A	C	C	C	C	C	T	A	G	C	C	T	G	0	0	yes	Secondary	Highly Related
SEN_RT_043.2015	T	A	T	T	G	C	A	G	A	T	T	G	C	A	C	A	T	A	A	G	C	T	T	G	0	0	no	Index	Highly Related
SEN_RT_196.2015	T	A	N	T	G	C	A	G	N	T	C	G	C	A	C	A	T	A	A	G	C	T	T	G	2	0	no	Secondary	Highly Related
SEN_RT_045.2015	C	A	T	T	C	C	A	A	A	T	C	G	T	A	C	C	C	A	C	G	A	T	T	G	0	0	no	Index	Highly Related
SEN_RT_312.2015	C	A	T	T	C	C	A	A	A	T	C	G	T	A	C	C	C	A	C	G	A	T	T	G	0	0	no	Secondary	Highly Related
SEN_RT_202.2014	C	A	T	T	C	G	A	G	A	T	C	G	C	A	C	A	C	T	A	G	C	T	T	G	0	0	no	Index	Highly Related
SEN_RT_135.2014	C	A	N	T	C	G	A	G	N	N	C	G	C	A	C	A	C	T	A	G	C	N	T	G	4	0	no	Secondary	Highly Related
SEN_RT_029.2015	C	A	T	T	C	C	A	G	A	C	T	G	C	A	C	A	C	A	A	G	C	T	T	G	0	0	no	Index	Highly Related
SEN_RT_162.2015	C	A	T	T	C	C	A	G	A	C	T	G	C	A	C	A	C	A	A	G	C	T	T	G	0	0	no	Secondary	Highly Related
SEN_RT_047.2013	T	A	C	T	N	C	A	G	A	N	C	G	C	A	C	N	T	A	A	G	C	C	T	G	3	0	yes	Index	Unrelated
SEN_RT_218.2013	C	A	T	T	G	C	G	G	A	C	T	G	C	A	A	A	T	T	C	G	C	C	T	G	0	0	no	Secondary	Unrelated
SEN_RT_055.2013	T	A	C	T	G	G	A	G	A	C	C	G	T	A	A	C	T	T	A	G	C	T	T	G	0	0	yes	Index	Unrelated
SEN_RT_222.2013	C	A	T	T	C	C	A	G	T	T	T	G	T	A	A	A	T	A	A	G	A	C	T	G	0	0	yes	Secondary	Unrelated
SEN_RT_057.2013	N	A	C	T	C	G	A	G	T	T	C	G	T	A	C	C	N	A	A	G	C	C	T	G	2	0	yes	Index	Unrelated
SEN_RT_231.2013	T	A	T	T	G	C	A	G	A	T	T	G	C	C	A	C	T	T	C	G	C	C	T	G	0	0	yes	Secondary	Unrelated
SEN_RT_125.2012	T	A	C	T	C	C	G	G	A	C	C	G	C	A	C	C	T	T	A	G	A	T	T	G	0	0	yes	Index	Unrelated
SEN_RT_102.2012	T	A	T	T	N	C	A	G	T	C	C	A	C	C	A	A	T	T	A	G	C	T	T	G	1	0	no	Secondary	Unrelated
SEN_RT_201.2013	C	A	T	T	C	G	A	G	A	T	C	G	C	A	C	A	C	T	A	G	C	T	T	G	0	0	no	Index	Unrelated
SEN_RT_219.2013	C	A	T	T	C	C	G	G	A	T	T	A	C	C	C	C	C	A	A	G	C	C	T	G	0	0	no	Secondary	Unrelated
SEN_RT_030.2015	T	A	C	C	C	G	G	G	T	C	C	G	T	A	A	C	C	A	A	G	A	C	T	G	0	0	yes	Index	Unrelated
SEN_RT_166.2015	C	A	N	T	C	G	A	G	T	T	T	G	C	A	C	C	N	T	A	G	A	T	T	G	2	0	yes	Secondary	Unrelated
SEN_RT_165.2015	T	A	C	T	N	C	N	G	T	C	T	A	C	A	N	A	C	A	A	A	A	C	T	G	3	0	yes	Secondary	Unrelated
SEN_RT_296.2015	C	A	C	T	C	C	A	G	T	C	X	A	C	C	A	C	C	A	A	G	C	T	T	G	0	1	yes	Index	Unrelated
SEN_RT_239.2015	C	A	N	T	G	G	G	G	T	C	T	N	T	A	N	C	N	T	A	G	C	T	X	G	4	1	yes	Secondary	Unrelated
SEN_RT_020.2014	T	A	C	T	G	C	G	G	T	N	T	G	C	A	C	C	C	T	A	A	C	T	T	G	1	0	yes	Index	Unrelated
SEN_RT_141.2014	T	A	C	C	C	C	A	G	T	C	T	A	C	C	A	C	C	X	C	A	C	C	T	G	0	1	no	Secondary	Unrelated
																												Category	Index: Traveler	Index: Non-Traveler
																												Household Match	1	6	7
																												Household No Match	7	1	8
																													8	7
																												Fisher Exact Test: p = 0.010
																												Rules
																												Include only samples with 0,1 missing assays
																												Include samples with 4 or fewer mixed assays
																												Concordant is matching at all positions, allowing one mismatch, N's ignored
																												Discordant is not matching 2 or more assays, N's ignored
